# Supplementary material for: The influence of thermal treatments on the secondary structure of silk fibroin scaffolds and their interaction with fibroblasts
Source: PeerJ journal article supplement (doi:10.7717/peerj-matsci.8), 2020-09-01
Supplement: Figure_3_raw_data.xlsx [file Figure_3_raw_data.xlsx]

## Sheet: Figure 3 (a)
	Treatment time(min)	II		I		II/I
		x10-9	Fractinal content	x10-9	Fractinal content
Wet heating @ 95oC	3	1.93203	0.501081	1.92369	0.498919	1.00433
	5	2.42303	0.507868	2.34795	0.492132	1.03198
	10	1.15486	0.523199	1.05245	0.476801	1.09731
	30	2.34717	0.544165	1.96617	0.455835	1.19378
	90	1.13687	0.552986	0.919008	0.447014	1.23707
	180	0.963127	0.552559	0.779903	0.447441	1.23493

## Sheet: Figure3 (b)
	treatment temperature (oC)	K	II		I		II/I
				content		content
No treatment	0	273	2377407	0.478257	2593573	0.521743	0.916653
Wet-heating	37	310	2705152	0.480416	2925699	0.519584	0.924617
	50	323	1852453	0.483137	1981765	0.516863	0.934749
	60	333	2690295	0.515498	2528535	0.484502	1.06397
	80	353	1877661	0.555648	1501567	0.444352	1.25047
	95	368	1156144	0.607457	747109	0.392543	1.54749
Autoclave	121	394	3179661	0.621268	1938356	0.378732	1.64039
Dry heating	180	453	3307365	0.488085	3468844	0.511915	0.953449
NON	.
Wet-heating
AC
DH
