# Supplementary material for: The influence of thermal treatments on the secondary structure of silk fibroin scaffolds and their interaction with fibroblasts
Source: PeerJ journal article supplement (doi:10.7717/peerj-matsci.8), 2020-09-01
Supplement: Figure_5_raw_data.xlsx [file Figure_5_raw_data.xlsx]

## Sheet: Sheet1
Non treatment	d (mm)	elastic modulus (MPa)	Tensile strength (N)
1	1.86	0.03851	0.1925
2	1.82	0.04389	0.18
3	1.82	0.03951	0.1575
4	1.81	0.04026	0.1675
Average	1.8275	0.0405425	0.174375
Stdev	0.0221736	0.00234398	0.0151898
60 oC	d (mm)	elastic modulus (MPa)	Tensile strength (N)
1	1.83	0.04189	0.1875
2	1.83	0.04163	0.1725
3	1.82	0.04182	0.1675
4	1.81	0.04347	0.175
Average	1.8225	0.0422025	0.175625
Stdev	0.00957427	0.00085211	0.00850857
80 oC	d (mm)	elastic modulus (MPa)	Tensile strength (N)
1	1.86	0.04531	0.185
2	1.85	0.04508	0.1225
3	1.83	0.03834	0.1575
4	1.85	0.02844	0.1475
Average	1.8475	0.0392925	0.153125
Stdev	0.0125831	0.00792442	0.0258501
95 oC	d (mm)	elastic modulus (MPa)	Tensile strength (N)
1	1.84	0.04712	0.17
2	1.84	0.04308	0.175
3	1.85	0.04917	0.1825
4	1.85	0.05285	0.1875
Average	1.845	0.048055	0.17875
Stdev	0.0057735	0.00407677	0.00777282
AC	d (mm)	elastic modulus (MPa)	Tensile strength (N)
1	1.9	0.05026	0.175
2	1.83	0.04282	0.185
3	1.82	0.04778	0.1675
4	1.84	0.05522	0.175
Average	1.8475	0.04902	0.175625
Stdev	0.0359398	0.00516253	0.0071807
DH	d (mm)	elastic modulus (MPa)	Tensile strength (N)
1	1.62	0.07865	0.17
2	1.61	0.08364	0.175
3	1.61	0.07209	0.17
4	1.61	0.07496	0.1725
Average	1.6125	0.077335	0.171875
Stdev	0.005	0.00498775	0.00239357
n=4
			Wet heating
		Non	60	80	95	AC	DH
Tensile strength (N)	Average	0.174375	0.175625	0.153125	0.17875	0.175625	0.171875
	Stdev	0.0151898	0.00850857	0.0258501	0.00777282	0.0071807	0.00239357
