# Supplementary material for: The influence of thermal treatments on the secondary structure of silk fibroin scaffolds and their interaction with fibroblasts
Source: PeerJ journal article supplement (doi:10.7717/peerj-matsci.8), 2020-09-01
Supplement: raw_date_of_Figure_for_the_review_#1.xlsx [file raw_date_of_Figure_for_the_review_%231.xlsx]

## Sheet: Sheet2
NON		60		80		95		AC		DH
Strain (mm)	Stress (N)	Strain (mm)	Stress (N)	Strain (mm)	Stress (N)	Strain (mm)	Stress (N)	Strain (mm)	Stress (N)	Strain (mm)	Stress (N)
0	0.005	0	0	0	0	0	0	0	0.005	0	0.0025
0.00533333	0	0.00766667	0.0025	0.00733333	0.0025	0.00766667	0	0.00733333	0.0075	0.00766667	0
0.0133333	0.0025	0.0153333	-0.0025	0.0153333	0	0.0156667	0	0.0156667	0.005	0.0156667	0
0.0213333	0.0025	0.0233333	-0.0025	0.0233333	0	0.0236667	0.0025	0.0233333	0.0075	0.0236667	0
0.0293333	0.0075	0.0313333	0	0.0313333	0	0.0313333	0	0.0316667	0.005	0.0316667	0
0.0373333	0.005	0.0393333	0.005	0.0393333	0	0.0396667	0.0025	0.0396667	0.0075	0.04	0.0075
0.0453333	0	0.0476667	0.0025	0.0473333	0	0.0476667	0	0.0476667	0.0075	0.0476667	0.005
0.0533333	0	0.0556667	0.0075	0.0556667	0.005	0.0556667	0	0.0556667	0.0075	0.056	0
0.0616667	0.0025	0.0636667	0.0025	0.0636667	0.0025	0.064	0	0.064	0.0025	0.064	0
0.0696667	0.005	0.0716667	0	0.0716667	0	0.0716667	0.0025	0.0716667	0.01	0.072	0
0.0776667	0	0.0796667	0	0.0796667	0.0075	0.08	0.0025	0.08	0.0075	0.08	0.0025
0.0856667	0	0.088	0	0.0876667	0.0025	0.088	0	0.088	0.0075	0.0883333	0
0.0936667	0.0075	0.096	0	0.096	0.005	0.096	0	0.096	0.0075	0.0963333	0
0.101667	0	0.104	0.0025	0.104	0	0.104333	0.0025	0.104333	0.0075	0.104333	0
0.11	0.005	0.112	0	0.112	0.0025	0.112	0	0.112333	0.0075	0.112333	0.005
0.117667	0.0075	0.12	0	0.12	0	0.12	0	0.120333	0.0125	0.120667	0
0.126	0	0.128333	0	0.128333	0.0025	0.128	-0.0025	0.128333	0.0075	0.128667	0.0025
0.134	0.0075	0.136333	0.005	0.136333	0.0025	0.136333	0	0.136333	0.01	0.136667	-0.005
0.142	0.0025	0.144333	0	0.144667	0	0.144333	0	0.144667	0.0075	0.144667	0.0025
0.150333	0	0.152333	0	0.152333	0	0.152333	0.005	0.152333	0.0075	0.152667	-0.0025
0.158333	0	0.160333	0	0.160333	0.005	0.160333	0.005	0.160667	0.01	0.160667	0
0.166333	0	0.168667	0.0025	0.168667	0.0025	0.168333	0	0.168667	0.01	0.169333	0
0.174333	0.01	0.176667	0.0025	0.176667	0.0025	0.176333	0	0.176667	0.0075	0.177	0
0.182333	0.0075	0.184667	0.0075	0.184667	0	0.184667	0.0025	0.185	0.01	0.185333	0.005
0.190667	0.005	0.192667	0.0075	0.192667	0	0.192667	0	0.193	0.0075	0.193	0
0.198333	0.0025	0.200667	0	0.200667	0	0.200667	0	0.201	0.0125	0.201333	0
0.206667	0	0.209	0	0.208667	0	0.208667	0	0.209	0.0075	0.209333	-0.0025
0.214667	0	0.217	0	0.217	0	0.216667	0.005	0.217333	0.015	0.217333	0.005
0.222667	0.0025	0.225	0	0.225	0.0025	0.225	0	0.225333	0.0075	0.225667	0.0025
0.230667	0.005	0.233	-0.0025	0.233	0.005	0.233	0	0.233333	0.015	0.233667	0.0075
0.239	0.0025	0.241	0	0.241333	0	0.241	0	0.241333	0.005	0.241667	0
0.247	0	0.249	0	0.249333	0	0.249	0	0.249333	0.0075	0.249667	0.005
0.255	0.005	0.257333	0	0.257333	0	0.257	0	0.257333	0.0125	0.258	0
0.263	0.0075	0.265333	0	0.265333	0	0.265333	0	0.265333	0.0125	0.266	-0.0025
0.271	0.0025	0.273333	0.005	0.273333	0	0.273333	0	0.273667	0.0125	0.274	0
0.279	0	0.281333	0	0.281333	0	0.281333	0	0.281667	0.0075	0.282	0.0025
0.287	0	0.289667	0	0.289667	0.0075	0.289667	0	0.289667	0.01	0.290333	0
0.295333	0.005	0.297667	0	0.297667	0.0025	0.297333	0.0025	0.298	0.0125	0.298333	0.0025
0.303333	0.005	0.305667	0	0.305667	0.0025	0.305333	0	0.306	0.0125	0.306333	0
0.311333	0	0.313667	0	0.314	0.0075	0.313667	0.0025	0.314	0.0075	0.314333	0.0025
0.319667	0.0025	0.322	0	0.321667	0.005	0.321667	0.0025	0.322	0.01	0.322333	0.0025
0.327667	0.0025	0.329667	0.005	0.33	0	0.329667	0	0.33	0.0175	0.330667	0
0.335667	0.0025	0.338	0.0025	0.338	0.005	0.337667	0	0.338	0.015	0.338667	-0.0025
0.343667	-0.0025	0.346	0	0.346	0.0025	0.345667	0	0.346333	0.01	0.346667	0.0025
0.351667	0	0.354	0	0.354	0.005	0.354	0	0.354333	0.0075	0.355	0
0.359667	0.005	0.362333	-0.005	0.362	0.0075	0.362	0	0.362333	0.01	0.362667	0.0025
0.367667	0	0.37	0	0.370333	0.0075	0.37	0	0.370333	0.0125	0.371	0
0.376	0	0.378333	0	0.378333	0.0025	0.378333	0	0.378333	0.0125	0.379	0.0025
0.384	0.005	0.386333	0.0025	0.386333	0	0.386333	0	0.386667	0.01	0.387	0
0.392	0.005	0.394333	0	0.394333	0	0.394333	0	0.394667	0.015	0.395333	-0.0025
0.4	0	0.402333	0	0.402333	0.0025	0.402333	0	0.402667	0.0125	0.403333	0
0.408	0	0.410333	0	0.410333	0.0025	0.410333	0	0.410667	0.015	0.411333	0
0.416	0	0.418667	-0.0025	0.418667	0.005	0.418667	0	0.418667	0.0075	0.419667	0
0.424333	0	0.426667	0	0.426667	0.0075	0.426333	0.0025	0.427	0.0175	0.427667	0.0025
0.432333	0	0.434667	0	0.435	0	0.434667	0.005	0.435	0.015	0.435667	0
0.440333	0.0025	0.443	0	0.442667	0.0075	0.442667	-0.0025	0.443	0.0175	0.443667	0.005
0.448333	0	0.450667	0	0.451	0.0025	0.450667	0.0025	0.451	0.015	0.451667	0.0075
0.456333	0.0075	0.458667	0	0.459	0	0.458667	-0.0025	0.459	0.015	0.46	0.0025
0.464333	0	0.467	0	0.467	0.0075	0.466667	-0.0025	0.467333	0.015	0.468	-0.0025
0.472333	0	0.475	0.0025	0.475	0.0075	0.475	0	0.475333	0.0175	0.476	0.005
0.480667	0	0.483	0.0025	0.483	0.005	0.483	0	0.483333	0.015	0.484	0.0025
0.488667	0.005	0.491333	0.005	0.491333	0	0.491	0	0.491333	0.0175	0.492333	0
0.496667	0	0.499333	0	0.499333	0.0075	0.499	0	0.499333	0.015	0.500667	0
0.504667	0	0.507333	0	0.507333	0.005	0.507	0	0.507333	0.0175	0.508333	0
0.512667	0.005	0.515333	0	0.515333	0	0.515333	0.0025	0.515333	0.015	0.516333	0
0.521	0.0075	0.523333	0	0.523667	0	0.523333	0	0.523333	0.0225	0.524667	0
0.528667	0.005	0.531333	0.0025	0.531667	0.0025	0.531333	0	0.531333	0.0175	0.532667	0
0.537	0	0.539667	-0.005	0.539667	0.0025	0.539333	0.0025	0.539667	0.015	0.541	0
0.545	0	0.547667	0	0.547667	0.0075	0.547333	0	0.547333	0.0125	0.548667	0
0.553	0	0.555667	0	0.555667	0.0025	0.555333	0	0.555667	0.0175	0.557	0
0.561	0	0.563667	0	0.564	0.005	0.563667	0	0.563667	0.0175	0.565	0.005
0.569	0	0.571667	0	0.572	0.0075	0.571667	0.0025	0.572	0.0175	0.573	0
0.577333	0	0.58	0	0.58	0.0025	0.579667	0	0.579667	0.0175	0.581333	0
0.585333	0.0025	0.588	0	0.588	0.005	0.587667	0	0.587667	0.0225	0.589333	0.005
0.593333	0.005	0.596	0	0.596	0.005	0.595667	0	0.596	0.015	0.597333	0.01
0.601333	0.0075	0.604	0.0025	0.604333	0.005	0.604	0	0.604	0.0225	0.605333	0
0.609333	0	0.612333	0	0.612333	0.0075	0.612	-0.0025	0.612	0.015	0.613333	0.005
0.617333	0	0.62	0	0.620333	0.0075	0.62	-0.0025	0.620333	0.0225	0.621667	0
0.625667	0	0.628333	0	0.628333	0.005	0.628	0	0.628333	0.0175	0.629667	0.0025
0.633667	0	0.636333	0	0.636333	0.0075	0.636	0	0.636333	0.025	0.637667	0.0025
0.641667	0.0025	0.644333	0	0.644667	0.0075	0.644333	0.0025	0.644333	0.0175	0.645667	0.0025
0.649667	0.0075	0.652667	0	0.652333	0.005	0.652333	0	0.652333	0.0225	0.653667	0
0.657667	0.0075	0.660667	0	0.660667	0.0075	0.660333	0	0.660667	0.02	0.662	0
0.665667	0	0.668667	0	0.668667	0.0125	0.668333	0	0.668667	0.02	0.67	0
0.673667	0	0.677	0.005	0.676667	0.0075	0.676333	0	0.676667	0.015	0.678	0
0.682	0	0.684667	0.0025	0.685	0.0075	0.684333	0	0.685	0.02	0.686	0.0025
0.69	0.0025	0.693	0	0.693	0.0075	0.692667	0	0.692667	0.02	0.694	0.0025
0.698	0.0025	0.700667	0	0.701	0.0125	0.700667	0	0.701	0.02	0.702333	0.005
0.706	0.0075	0.709	0	0.709	0.01	0.708667	0.0025	0.709	0.02	0.710333	0.0075
0.714333	0.005	0.717	0	0.717	0.005	0.716667	0	0.717	0.0175	0.718333	0.0025
0.722	0.0025	0.725	0.0025	0.725333	0.01	0.724667	0	0.725	0.02	0.726333	0.0025
0.730333	0.0025	0.733333	0.0025	0.733333	0.015	0.733	0	0.733	0.0175	0.734333	0.0075
0.738333	0.005	0.741333	0	0.741333	0.0075	0.741	0	0.741333	0.0175	0.742667	0.0025
0.746333	0.005	0.749333	0	0.749333	0.0075	0.749	0	0.749333	0.02	0.750667	0.005
0.754333	0	0.757333	0.005	0.757333	0.01	0.757	-0.0025	0.757333	0.015	0.759	0.005
0.762333	0.0025	0.765667	0	0.765667	0.0175	0.765	0	0.765333	0.025	0.766667	0.005
0.770667	0.005	0.773667	0.0025	0.773667	0.0125	0.773333	0	0.773667	0.02	0.775	0.0025
0.778667	0.0075	0.781667	0.0025	0.781667	0.0075	0.781333	0	0.781667	0.0225	0.783	0.005
0.786667	0.0075	0.789667	0	0.79	0.0125	0.789333	0	0.789667	0.025	0.791	0.0075
0.794667	0.005	0.797667	0	0.797667	0.0175	0.797333	0.0025	0.797667	0.0225	0.799	0.01
0.802667	0.0025	0.805667	0.0025	0.806	0.015	0.805333	0	0.805667	0.0175	0.807333	0.0075
0.810667	0.0075	0.814	0.0025	0.814	0.01	0.813667	0	0.814	0.0175	0.815333	0.0125
0.819	0.005	0.822	0.0025	0.822	0.015	0.821667	0	0.822	0.0225	0.823333	0.0075
0.827	0.0025	0.83	0	0.830333	0.0175	0.829667	0	0.83	0.02	0.831667	0.005
0.835	0.0025	0.838	0.005	0.838	0.01	0.837667	0	0.838	0.0175	0.839667	0.0075
0.843	0.005	0.846	0	0.846333	0.0125	0.845667	0	0.846	0.025	0.847667	0.0125
0.851	0.0075	0.854	0.005	0.854333	0.015	0.853667	0	0.854333	0.025	0.856	0.01
0.859333	0.0025	0.862333	0	0.862333	0.0175	0.862	-0.0025	0.862333	0.025	0.863667	0.0075
0.867333	0.0025	0.87	0.005	0.870667	0.015	0.87	0	0.870333	0.0225	0.872	0.0125
0.875333	0.0075	0.878333	0.0075	0.878333	0.0175	0.878	0	0.878333	0.0225	0.88	0.01
0.883333	0.005	0.886333	0.005	0.886667	0.015	0.886	0	0.886333	0.02	0.888	0.01
0.891333	0.0025	0.894333	0.005	0.894667	0.0175	0.894	0	0.894667	0.025	0.896	0.01
0.899667	0.0025	0.902667	0.005	0.902667	0.0175	0.902	0	0.902667	0.0175	0.904	0.015
0.907667	0.005	0.910667	0	0.910667	0.01	0.91	0	0.910667	0.025	0.912333	0.015
0.915333	0.0075	0.918667	0.0025	0.918667	0.01	0.918333	0	0.918667	0.02	0.920333	0.015
0.923667	0.0075	0.926667	0.005	0.927	0.0175	0.926333	0	0.926667	0.0225	0.928667	0.0075
0.931667	0.0025	0.934667	0.0025	0.935	0.0125	0.934333	0	0.935	0.02	0.936667	0.015
0.939667	0.0075	0.943	0	0.943	0.015	0.942333	0	0.943	0.0225	0.944667	0.015
0.947667	0.01	0.951	0.005	0.951	0.0175	0.950667	0	0.951	0.02	0.952667	0.0175
0.955667	0.0075	0.958667	0.0075	0.959333	0.025	0.958667	0	0.959	0.02	0.961	0.01
0.964	0.005	0.967	0.0075	0.967333	0.0125	0.966667	0.0025	0.967	0.0225	0.968667	0.015
0.972	0.0125	0.975	0.0075	0.975667	0.0175	0.974667	0	0.975333	0.025	0.977	0.02
0.98	0.01	0.983	0.005	0.983667	0.0125	0.982667	0	0.983333	0.0225	0.985	0.0125
0.988	0.0175	0.991333	0.0075	0.991333	0.02	0.990667	0	0.991333	0.025	0.993	0.0125
0.996	0.0075	0.999333	0.0075	0.999667	0.0175	0.999	0	0.999333	0.0175	1.00133	0.01
1.00433	0.0125	1.00733	0.01	1.00767	0.02	1.007	0	1.00733	0.025	1.009	0.0175
1.01233	0.0075	1.01533	0.005	1.01567	0.02	1.015	0	1.01567	0.02	1.01733	0.01
1.02033	0.0075	1.02333	0.005	1.02367	0.0225	1.023	0	1.02367	0.02	1.02533	0.015
1.02867	0.0075	1.03133	0.0025	1.032	0.02	1.031	0	1.03167	0.0225	1.03333	0.0125
1.03667	0.015	1.03967	0.0075	1.04	0.0175	1.03933	0.0075	1.04	0.025	1.04167	0.0125
1.04467	0.0125	1.04767	0.005	1.048	0.02	1.04733	0.0025	1.04767	0.0175	1.04967	0.015
1.05267	0.0125	1.05567	0.01	1.056	0.0175	1.05533	0	1.056	0.025	1.05767	0.0125
1.06067	0.0125	1.064	0.005	1.064	0.02	1.06333	-0.0025	1.064	0.0275	1.06567	0.015
1.06867	0.0125	1.072	0.01	1.07233	0.0225	1.07133	0	1.072	0.025	1.074	0.015
1.07667	0.01	1.08	0.0075	1.08033	0.015	1.07933	0.005	1.08033	0.0225	1.082	0.015
1.08467	0.01	1.088	0.0075	1.08833	0.02	1.08733	0	1.08833	0.025	1.09	0.0125
1.093	0.0175	1.096	0.0075	1.09633	0.0175	1.09567	0.0025	1.09633	0.02	1.098	0.0175
1.101	0.0175	1.104	0.0075	1.10467	0.02	1.10367	0	1.10433	0.0275	1.106	0.0175
1.109	0.01	1.112	0.01	1.11267	0.0175	1.11167	0	1.11267	0.025	1.114	0.0175
1.117	0.015	1.12033	0.0125	1.12067	0.0225	1.11967	0	1.12067	0.025	1.12233	0.015
1.125	0.015	1.12833	0.0075	1.12867	0.0175	1.128	0	1.12867	0.0225	1.13033	0.0175
1.133	0.0175	1.13633	0.01	1.13667	0.0225	1.136	0	1.13667	0.025	1.13833	0.015
1.141	0.01	1.14433	0.0075	1.145	0.0175	1.144	0	1.145	0.03	1.14667	0.0175
1.14933	0.0175	1.15267	0.005	1.15267	0.025	1.152	0	1.15267	0.03	1.15467	0.015
1.15733	0.0075	1.16033	0.0075	1.161	0.0175	1.16	0	1.161	0.0175	1.16267	0.0175
1.16533	0.0175	1.16867	0.0075	1.169	0.025	1.168	0.0025	1.169	0.025	1.171	0.0175
1.17333	0.0125	1.177	0.01	1.177	0.02	1.176	0	1.177	0.025	1.17867	0.02
1.18133	0.015	1.18467	0.01	1.18533	0.0225	1.18433	0	1.18533	0.03	1.187	0.0175
1.18967	0.015	1.193	0.01	1.193	0.0225	1.19233	0	1.19333	0.0175	1.195	0.0175
1.19767	0.0175	1.20067	0.015	1.20133	0.025	1.20033	0	1.20133	0.025	1.203	0.0175
1.20567	0.015	1.209	0.015	1.20933	0.02	1.20867	0.0025	1.20933	0.025	1.211	0.0125
1.21367	0.0175	1.217	0.01	1.21733	0.0225	1.21633	0	1.21733	0.025	1.21933	0.0175
1.22167	0.0125	1.225	0.0075	1.22567	0.02	1.22467	0	1.22567	0.0175	1.22733	0.0175
1.23	0.0175	1.23267	0.01	1.23367	0.0225	1.23267	0.0075	1.23367	0.0225	1.23533	0.0175
1.238	0.01	1.241	0.01	1.24167	0.02	1.24067	0.0025	1.24167	0.0225	1.24333	0.0175
1.246	0.02	1.249	0.0125	1.24967	0.02	1.249	0	1.24967	0.03	1.25167	0.02
1.254	0.0125	1.257	0.0075	1.25767	0.02	1.25667	0.0025	1.25767	0.0225	1.25967	0.0175
1.262	0.0175	1.265	0.015	1.26567	0.02	1.265	0	1.26567	0.03	1.26767	0.02
1.27033	0.0125	1.273	0.0175	1.274	0.02	1.273	0.0025	1.274	0.0225	1.27567	0.0175
1.27833	0.0175	1.28133	0.015	1.282	0.025	1.281	0	1.282	0.035	1.284	0.0175
1.28633	0.0175	1.28933	0.0125	1.29	0.02	1.289	0	1.29	0.0225	1.292	0.02
1.29433	0.02	1.29733	0.0125	1.298	0.025	1.297	0	1.298	0.025	1.3	0.0175
1.30233	0.015	1.30533	0.01	1.306	0.025	1.30533	0.0025	1.306	0.025	1.308	0.02
1.31067	0.0175	1.31333	0.0125	1.31433	0.025	1.31333	0	1.31433	0.0275	1.316	0.0175
1.31867	0.02	1.32133	0.015	1.32233	0.0175	1.32133	0	1.32233	0.0275	1.32433	0.0175
1.32667	0.0175	1.32933	0.015	1.33033	0.025	1.32933	0.0025	1.33033	0.0225	1.33267	0.015
1.33467	0.015	1.33767	0.015	1.33833	0.025	1.33733	0.0075	1.33833	0.025	1.34033	0.0175
1.34267	0.02	1.34567	0.0125	1.34633	0.0225	1.34567	0.0075	1.34667	0.025	1.34833	0.0175
1.35067	0.0175	1.35367	0.0075	1.35467	0.025	1.35367	0.005	1.35467	0.025	1.35667	0.0225
1.359	0.0175	1.36167	0.0175	1.36267	0.025	1.36167	0.0075	1.36267	0.0275	1.36467	0.02
1.367	0.0175	1.36967	0.0125	1.37067	0.02	1.36967	0	1.371	0.025	1.373	0.025
1.375	0.0175	1.37767	0.0125	1.37867	0.0275	1.378	0.0075	1.37867	0.0275	1.381	0.0175
1.383	0.0175	1.38567	0.015	1.387	0.0225	1.386	0	1.387	0.02	1.389	0.02
1.391	0.0225	1.394	0.0125	1.395	0.0225	1.394	0.0075	1.395	0.03	1.397	0.025
1.39933	0.02	1.402	0.015	1.403	0.02	1.402	0.0025	1.403	0.025	1.405	0.0225
1.40733	0.0225	1.41	0.0175	1.411	0.025	1.41	0.0075	1.411	0.025	1.413	0.02
1.41533	0.015	1.41833	0.0175	1.419	0.0225	1.418	0.0075	1.419	0.025	1.421	0.025
1.42333	0.0225	1.42633	0.0175	1.427	0.0225	1.426	0.01	1.42733	0.025	1.429	0.02
1.43133	0.0175	1.43433	0.0175	1.43533	0.025	1.43433	0.0025	1.43533	0.025	1.437	0.025
1.43967	0.0225	1.44233	0.015	1.44333	0.025	1.44233	0.0075	1.44333	0.03	1.445	0.02
1.44767	0.0225	1.45033	0.015	1.45133	0.0225	1.45033	0.005	1.45133	0.025	1.45333	0.02
1.45567	0.02	1.45833	0.0125	1.45933	0.03	1.45833	0.0025	1.45933	0.0275	1.46133	0.0175
1.46367	0.0175	1.46667	0.0175	1.46733	0.0275	1.46633	0	1.46767	0.025	1.46933	0.0225
1.47167	0.02	1.47433	0.0175	1.47567	0.025	1.47467	0.0075	1.47567	0.0325	1.47733	0.02
1.48	0.0175	1.48267	0.0175	1.48367	0.02	1.48267	0.01	1.48367	0.025	1.48567	0.0225
1.488	0.0225	1.49067	0.015	1.49167	0.025	1.49067	0.01	1.49167	0.03	1.49367	0.02
1.496	0.0175	1.499	0.0175	1.49967	0.025	1.49867	0.0075	1.5	0.0275	1.502	0.0225
1.504	0.02	1.507	0.0175	1.50767	0.025	1.50667	0.005	1.508	0.0325	1.50967	0.025
1.512	0.02	1.515	0.0175	1.516	0.025	1.515	0.0075	1.51633	0.025	1.518	0.025
1.52	0.0225	1.523	0.02	1.524	0.025	1.523	0.0075	1.524	0.025	1.526	0.025
1.528	0.0225	1.531	0.0175	1.532	0.0225	1.531	0.0075	1.532	0.025	1.534	0.025
1.53633	0.02	1.539	0.0175	1.54033	0.025	1.539	0.0025	1.54033	0.0275	1.54233	0.025
1.54433	0.02	1.54733	0.0225	1.548	0.0225	1.547	0.0075	1.54833	0.0275	1.55	0.0225
1.55233	0.02	1.555	0.0175	1.55633	0.025	1.555	0.01	1.55633	0.0275	1.55833	0.02
1.56033	0.025	1.56333	0.0175	1.56433	0.025	1.56333	0.0075	1.56433	0.025	1.56633	0.02
1.56867	0.025	1.57133	0.0175	1.57233	0.03	1.57133	0.0075	1.57233	0.0325	1.57467	0.0275
1.57667	0.02	1.57933	0.0175	1.58067	0.0225	1.57933	0.005	1.58067	0.03	1.58267	0.025
1.58467	0.025	1.58733	0.0175	1.58867	0.025	1.58733	0.0125	1.58833	0.0325	1.59067	0.025
1.59267	0.025	1.59567	0.0175	1.59667	0.025	1.59533	0.01	1.59667	0.025	1.59867	0.02
1.60067	0.0175	1.60367	0.0175	1.605	0.025	1.60367	0.005	1.60467	0.0325	1.607	0.025
1.609	0.025	1.61167	0.015	1.61267	0.02	1.61167	0.0125	1.613	0.025	1.61467	0.025
1.61667	0.025	1.61967	0.0175	1.62067	0.0275	1.61967	0.015	1.621	0.0275	1.623	0.025
1.625	0.0175	1.62767	0.0175	1.629	0.0275	1.62767	0.0075	1.629	0.0275	1.631	0.0225
1.633	0.025	1.636	0.0175	1.637	0.0275	1.63567	0.0075	1.637	0.0325	1.639	0.0275
1.641	0.0225	1.644	0.015	1.64533	0.025	1.644	0.0075	1.64533	0.0275	1.64733	0.025
1.64933	0.0275	1.652	0.02	1.653	0.025	1.652	0.01	1.653	0.025	1.65533	0.02
1.657	0.0175	1.66	0.0175	1.66133	0.0275	1.66	0.0075	1.66133	0.03	1.66333	0.025
1.66533	0.0225	1.66833	0.0175	1.66933	0.0325	1.668	0.01	1.66933	0.0325	1.67133	0.0275
1.67333	0.0275	1.67633	0.0175	1.67733	0.0275	1.676	0.0125	1.67733	0.025	1.67967	0.025
1.68133	0.025	1.68433	0.0175	1.68567	0.03	1.684	0.0175	1.68567	0.0325	1.68767	0.025
1.68933	0.02	1.69233	0.0175	1.69333	0.0275	1.69233	0.01	1.69367	0.03	1.69567	0.0175
1.69733	0.0225	1.70033	0.02	1.70133	0.0275	1.70033	0.0125	1.70167	0.0325	1.704	0.025
1.70567	0.025	1.70833	0.02	1.70967	0.0225	1.70833	0.01	1.70967	0.0275	1.712	0.0225
1.71367	0.03	1.71667	0.0225	1.71767	0.025	1.71633	0.0175	1.71767	0.0325	1.72	0.0275
1.72167	0.025	1.72467	0.0175	1.72567	0.0325	1.72433	0.0075	1.726	0.0275	1.728	0.025
1.72967	0.0225	1.73267	0.02	1.734	0.0275	1.73267	0.01	1.734	0.0325	1.736	0.025
1.73767	0.0225	1.74067	0.02	1.742	0.025	1.74067	0.015	1.742	0.03	1.744	0.025
1.746	0.025	1.74867	0.0175	1.75	0.03	1.74867	0.0175	1.75	0.03	1.75233	0.0275
1.754	0.025	1.757	0.0225	1.758	0.0325	1.75667	0.015	1.758	0.03	1.76033	0.025
1.762	0.025	1.765	0.0225	1.766	0.0325	1.76467	0.0175	1.76633	0.035	1.76833	0.0275
1.77	0.03	1.773	0.0175	1.774	0.0275	1.773	0.0175	1.77433	0.025	1.77633	0.025
1.778	0.0275	1.781	0.02	1.78233	0.03	1.781	0.0175	1.78233	0.035	1.78433	0.0275
1.786	0.025	1.789	0.0175	1.79033	0.03	1.789	0.0125	1.79033	0.03	1.79267	0.03
1.794	0.0275	1.79733	0.0175	1.79833	0.0325	1.797	0.015	1.79833	0.035	1.80067	0.03
1.802	0.025	1.80533	0.025	1.80633	0.025	1.805	0.0175	1.80667	0.0325	1.80867	0.03
1.81033	0.025	1.81333	0.025	1.81467	0.0325	1.813	0.015	1.81467	0.035	1.817	0.025
1.81867	0.02	1.82133	0.02	1.82267	0.0325	1.821	0.0175	1.82267	0.0325	1.82467	0.0275
1.82633	0.025	1.82933	0.0225	1.83067	0.035	1.82933	0.0175	1.83067	0.03	1.83333	0.035
1.83467	0.0275	1.83767	0.0175	1.83867	0.0275	1.83733	0.0175	1.839	0.035	1.841	0.0325
1.84267	0.035	1.84567	0.025	1.847	0.035	1.84533	0.0175	1.847	0.0325	1.849	0.035
1.85067	0.0275	1.85367	0.0225	1.855	0.025	1.85333	0.015	1.855	0.0325	1.85733	0.0275
1.85867	0.0275	1.862	0.0225	1.863	0.035	1.86133	0.015	1.863	0.035	1.86533	0.035
1.86667	0.0275	1.86967	0.02	1.871	0.03	1.86933	0.0125	1.87133	0.0325	1.87333	0.0325
1.87467	0.0275	1.878	0.0225	1.879	0.0275	1.87767	0.02	1.879	0.035	1.88133	0.04
1.88267	0.025	1.886	0.0225	1.887	0.035	1.88567	0.02	1.88733	0.0325	1.88967	0.0325
1.891	0.02	1.894	0.0175	1.89533	0.035	1.89367	0.02	1.89533	0.035	1.89767	0.0375
1.899	0.025	1.902	0.0225	1.90333	0.0275	1.90167	0.02	1.90333	0.035	1.90567	0.0325
1.907	0.0275	1.91	0.02	1.91133	0.025	1.90967	0.02	1.91133	0.0425	1.91367	0.035
1.915	0.035	1.91833	0.0175	1.91933	0.03	1.918	0.02	1.91933	0.0325	1.922	0.025
1.923	0.025	1.92633	0.0175	1.92733	0.035	1.92567	0.0175	1.92767	0.035	1.93	0.0325
1.93133	0.0275	1.93433	0.0225	1.93567	0.03	1.934	0.0175	1.93567	0.035	1.938	0.025
1.93933	0.035	1.94233	0.02	1.94367	0.035	1.942	0.0175	1.94367	0.035	1.946	0.035
1.94733	0.025	1.95067	0.0175	1.95167	0.035	1.95	0.0175	1.95167	0.0325	1.954	0.0275
1.95533	0.025	1.95867	0.0175	1.95967	0.035	1.95833	0.025	1.96	0.035	1.96233	0.035
1.96333	0.0325	1.96667	0.0225	1.96767	0.03	1.96633	0.0175	1.968	0.035	1.97033	0.03
1.97133	0.03	1.97467	0.0175	1.976	0.04	1.97433	0.0225	1.976	0.0375	1.97833	0.035
1.97967	0.025	1.98267	0.0225	1.984	0.035	1.98233	0.02	1.984	0.035	1.98633	0.0325
1.98767	0.025	1.991	0.02	1.992	0.0375	1.99033	0.02	1.992	0.035	1.99467	0.035
1.99567	0.025	1.999	0.025	2.00033	0.0325	1.99833	0.02	2.00033	0.0375	2.00267	0.03
2.00367	0.03	2.007	0.02	2.008	0.035	2.00633	0.0225	2.00833	0.04	2.01067	0.0325
2.01167	0.03	2.015	0.02	2.01633	0.0375	2.01467	0.0225	2.01633	0.0325	2.01867	0.035
2.02	0.0275	2.02333	0.025	2.02433	0.04	2.02267	0.0175	2.02433	0.035	2.02667	0.0375
2.028	0.03	2.03133	0.0175	2.03233	0.0325	2.031	0.02	2.03267	0.035	2.035	0.0325
2.036	0.0275	2.03933	0.0175	2.04033	0.035	2.039	0.025	2.04067	0.04	2.043	0.04
2.044	0.025	2.04767	0.02	2.04833	0.035	2.047	0.0175	2.04867	0.0325	2.051	0.0325
2.052	0.0325	2.05533	0.025	2.05667	0.0375	2.05467	0.0225	2.05667	0.035	2.059	0.0375
2.06033	0.035	2.06367	0.025	2.06467	0.0375	2.063	0.0225	2.06467	0.04	2.067	0.0325
2.06833	0.03	2.07167	0.0225	2.07267	0.0325	2.071	0.0225	2.073	0.0425	2.07533	0.0425
2.07633	0.025	2.07967	0.0225	2.08067	0.04	2.079	0.0225	2.081	0.035	2.08333	0.035
2.08433	0.025	2.08767	0.025	2.08867	0.0375	2.08733	0.02	2.089	0.0375	2.09133	0.0425
2.09233	0.0275	2.09567	0.025	2.097	0.035	2.09533	0.0225	2.097	0.035	2.09967	0.0425
2.10067	0.0325	2.10367	0.0175	2.105	0.0375	2.10333	0.0225	2.10533	0.0425	2.10767	0.0425
2.10867	0.03	2.112	0.025	2.113	0.035	2.11133	0.0225	2.11333	0.0375	2.11567	0.0425
2.11667	0.0325	2.12	0.0175	2.121	0.04	2.11933	0.0225	2.12133	0.035	2.12367	0.0425
2.12467	0.0325	2.128	0.0225	2.129	0.035	2.12733	0.0175	2.12933	0.035	2.13167	0.0475
2.13267	0.035	2.13633	0.0225	2.137	0.0375	2.13533	0.02	2.13733	0.0375	2.13967	0.04
2.14067	0.025	2.144	0.0225	2.14533	0.0375	2.14367	0.0175	2.14567	0.0375	2.148	0.045
2.149	0.0275	2.15233	0.02	2.15333	0.0425	2.15167	0.02	2.15367	0.035	2.156	0.0425
2.15667	0.025	2.16033	0.0225	2.16133	0.035	2.15967	0.0275	2.16167	0.04	2.16433	0.0425
2.165	0.035	2.16867	0.02	2.16933	0.04	2.16767	0.025	2.16967	0.0375	2.17233	0.0425
2.173	0.025	2.17667	0.0175	2.17733	0.0375	2.17567	0.02	2.17767	0.0425	2.18033	0.0425
2.181	0.0275	2.18467	0.02	2.18567	0.0375	2.184	0.0225	2.186	0.0375	2.18833	0.05
2.18933	0.03	2.19267	0.0275	2.19367	0.0375	2.192	0.025	2.194	0.035	2.19633	0.0425
2.197	0.035	2.20067	0.025	2.20167	0.0425	2.2	0.0225	2.202	0.045	2.20433	0.04
2.205	0.03	2.20867	0.03	2.20967	0.0375	2.208	0.0225	2.21	0.04	2.21267	0.045
2.21333	0.0275	2.21667	0.0225	2.218	0.0425	2.216	0.0225	2.21833	0.04	2.22067	0.045
2.22133	0.0325	2.225	0.025	2.226	0.035	2.224	0.0225	2.22633	0.0425	2.22867	0.05
2.22933	0.035	2.233	0.025	2.234	0.035	2.232	0.025	2.23433	0.035	2.23667	0.045
2.23767	0.03	2.241	0.025	2.242	0.0425	2.24	0.0225	2.24233	0.035	2.245	0.0475
2.24567	0.03	2.249	0.0225	2.25033	0.0425	2.248	0.025	2.25033	0.04	2.253	0.0475
2.25367	0.0325	2.25733	0.03	2.25833	0.035	2.256	0.0225	2.25833	0.035	2.26133	0.0475
2.26167	0.025	2.26533	0.025	2.26633	0.0425	2.26433	0.025	2.26667	0.0375	2.269	0.0425
2.26967	0.0275	2.27333	0.025	2.27433	0.0425	2.27233	0.0175	2.27467	0.04	2.27733	0.045
2.27767	0.0325	2.28133	0.025	2.28233	0.04	2.28033	0.025	2.28267	0.0425	2.28533	0.05
2.28567	0.03	2.28933	0.025	2.29067	0.0375	2.28833	0.025	2.29067	0.0375	2.29333	0.045
2.294	0.035	2.29767	0.0225	2.29867	0.045	2.29633	0.025	2.29867	0.0425	2.30133	0.0475
2.302	0.03	2.30567	0.025	2.30667	0.04	2.30467	0.025	2.307	0.04	2.30967	0.045
2.31	0.035	2.31367	0.025	2.315	0.0475	2.31267	0.025	2.315	0.0425	2.31767	0.0475
2.31833	0.035	2.32167	0.025	2.32267	0.0375	2.32067	0.025	2.323	0.0425	2.32567	0.0475
2.326	0.0325	2.32967	0.025	2.331	0.0425	2.32867	0.025	2.331	0.0425	2.334	0.0425
2.33433	0.03	2.338	0.025	2.33867	0.0425	2.33667	0.02	2.339	0.04	2.342	0.0475
2.34233	0.0375	2.346	0.025	2.347	0.04	2.345	0.0275	2.34733	0.045	2.35	0.05
2.35033	0.0375	2.354	0.025	2.355	0.0425	2.353	0.0225	2.35533	0.0375	2.358	0.05
2.35833	0.035	2.36233	0.025	2.363	0.0425	2.361	0.0275	2.36333	0.045	2.366	0.05
2.36633	0.0275	2.37	0.0325	2.371	0.0425	2.369	0.0225	2.37133	0.04	2.37433	0.0475
2.37467	0.035	2.37833	0.0225	2.37933	0.0425	2.377	0.025	2.37933	0.0425	2.38233	0.0525
2.38233	0.0375	2.38633	0.0325	2.38733	0.04	2.385	0.025	2.38767	0.0425	2.39033	0.0425
2.39067	0.04	2.39433	0.0275	2.39533	0.04	2.39333	0.025	2.39567	0.0425	2.39833	0.05
2.39867	0.035	2.40233	0.0275	2.40333	0.0425	2.40133	0.025	2.40367	0.04	2.40633	0.0425
2.40667	0.035	2.41033	0.025	2.41133	0.045	2.40933	0.025	2.41167	0.04	2.41467	0.05
2.41467	0.04	2.41867	0.025	2.41967	0.04	2.41733	0.025	2.41967	0.0375	2.42267	0.0525
2.423	0.035	2.42667	0.025	2.42767	0.04	2.42533	0.0275	2.428	0.04	2.43067	0.0425
2.431	0.035	2.43467	0.03	2.43567	0.0475	2.43367	0.0225	2.436	0.0425	2.43867	0.0525
2.439	0.035	2.44267	0.0225	2.44367	0.0425	2.44167	0.025	2.444	0.0425	2.447	0.0525
2.447	0.0375	2.451	0.03	2.45167	0.0425	2.44967	0.0225	2.452	0.04	2.455	0.05
2.455	0.035	2.45867	0.025	2.46	0.0425	2.45767	0.0325	2.46	0.0425	2.463	0.0525
2.46333	0.0325	2.467	0.0275	2.468	0.04	2.46567	0.0225	2.46833	0.0425	2.471	0.0475
2.471	0.035	2.475	0.025	2.476	0.04	2.474	0.025	2.47633	0.0475	2.47933	0.0475
2.47933	0.0375	2.48333	0.0275	2.484	0.04	2.482	0.025	2.48433	0.0425	2.48733	0.05
2.48733	0.0375	2.491	0.0275	2.492	0.0425	2.49	0.0325	2.49233	0.0425	2.49533	0.0525
2.49533	0.035	2.49933	0.0275	2.50033	0.0425	2.498	0.0225	2.50033	0.0425	2.50333	0.0475
2.50367	0.035	2.50733	0.025	2.50833	0.0475	2.506	0.025	2.50833	0.045	2.51167	0.0525
2.51133	0.0375	2.51533	0.025	2.51667	0.0425	2.514	0.025	2.51667	0.0425	2.51967	0.0525
2.51967	0.035	2.52367	0.0225	2.52433	0.04	2.52233	0.03	2.52467	0.0425	2.52767	0.0525
2.52767	0.035	2.53167	0.03	2.53233	0.0475	2.53033	0.0225	2.53267	0.0425	2.53567	0.055
2.53567	0.0375	2.53967	0.025	2.54067	0.0425	2.53833	0.025	2.54067	0.0425	2.54367	0.0575
2.54367	0.04	2.54767	0.03	2.54867	0.045	2.54633	0.03	2.54867	0.045	2.552	0.0525
2.55167	0.0375	2.55567	0.0275	2.55667	0.0425	2.55433	0.0275	2.557	0.0425	2.56	0.0575
2.56	0.0375	2.564	0.0325	2.56467	0.0425	2.56267	0.035	2.565	0.04	2.568	0.05
2.568	0.0325	2.572	0.0325	2.573	0.0475	2.57067	0.0275	2.573	0.0475	2.576	0.055
2.576	0.035	2.58	0.03	2.581	0.04	2.57867	0.0275	2.581	0.04	2.58433	0.0575
2.584	0.035	2.588	0.0325	2.589	0.0425	2.58667	0.03	2.589	0.0425	2.59233	0.0525
2.59233	0.035	2.596	0.025	2.597	0.0475	2.59467	0.025	2.59733	0.0425	2.60033	0.0525
2.60033	0.035	2.60433	0.0325	2.60533	0.0425	2.603	0.025	2.60533	0.0475	2.60833	0.055
2.60833	0.0375	2.61233	0.03	2.613	0.0425	2.61067	0.0275	2.61367	0.0425	2.61633	0.0575
2.61633	0.0375	2.62033	0.03	2.621	0.045	2.619	0.03	2.62133	0.0375	2.62467	0.0525
2.62433	0.035	2.62833	0.0325	2.62933	0.0425	2.627	0.025	2.62933	0.045	2.63267	0.055
2.63233	0.0375	2.63633	0.025	2.63733	0.045	2.635	0.025	2.63733	0.0425	2.64067	0.06
2.64033	0.04	2.64433	0.035	2.64567	0.0425	2.643	0.0275	2.64567	0.0475	2.64867	0.0525
2.64867	0.04	2.65267	0.03	2.65333	0.045	2.651	0.0325	2.65367	0.0425	2.657	0.055
2.65667	0.035	2.66067	0.0325	2.66167	0.0475	2.65933	0.025	2.66167	0.0425	2.665	0.0525
2.66467	0.035	2.66867	0.025	2.66933	0.0425	2.66733	0.0275	2.66967	0.0425	2.673	0.06
2.67267	0.0375	2.67667	0.035	2.67767	0.045	2.67533	0.0275	2.67767	0.0425	2.68133	0.055
2.68067	0.0425	2.685	0.0325	2.68567	0.0475	2.68333	0.0275	2.686	0.0475	2.68933	0.0575
2.689	0.035	2.693	0.035	2.69367	0.0425	2.69133	0.03	2.694	0.0425	2.69733	0.0525
2.697	0.035	2.701	0.025	2.70167	0.0475	2.69933	0.035	2.70233	0.045	2.70533	0.06
2.705	0.0375	2.709	0.03	2.70967	0.04	2.70733	0.03	2.71	0.0425	2.713	0.0575
2.713	0.0425	2.717	0.0325	2.71767	0.0425	2.71567	0.03	2.718	0.04	2.72133	0.0575
2.721	0.0425	2.72533	0.035	2.726	0.0425	2.72367	0.025	2.72633	0.0425	2.72933	0.055
2.729	0.0375	2.73333	0.03	2.734	0.0425	2.732	0.025	2.73433	0.0525	2.73733	0.06
2.73733	0.04	2.74133	0.04	2.742	0.0425	2.73967	0.03	2.74233	0.0525	2.74533	0.055
2.74533	0.04	2.74933	0.0275	2.75033	0.05	2.74767	0.03	2.75033	0.0425	2.75333	0.06
2.75333	0.035	2.75733	0.035	2.75833	0.05	2.75567	0.0275	2.75867	0.045	2.76167	0.055
2.76133	0.0375	2.76533	0.03	2.76633	0.045	2.764	0.03	2.76667	0.0475	2.76967	0.06
2.76933	0.0425	2.77333	0.035	2.77467	0.045	2.772	0.03	2.77467	0.0425	2.77767	0.0575
2.77767	0.04	2.78133	0.0325	2.78233	0.045	2.78	0.035	2.78267	0.045	2.78567	0.06
2.78567	0.0375	2.78933	0.035	2.79067	0.0425	2.78833	0.03	2.79067	0.05	2.794	0.06
2.79367	0.0425	2.79733	0.035	2.79867	0.045	2.796	0.0325	2.79867	0.0475	2.802	0.0625
2.80167	0.0425	2.80533	0.035	2.80667	0.0425	2.80433	0.03	2.807	0.05	2.81	0.06
2.80967	0.045	2.81367	0.035	2.815	0.045	2.81233	0.0325	2.815	0.045	2.818	0.0625
2.818	0.04	2.82167	0.035	2.82267	0.0525	2.82033	0.03	2.82267	0.0475	2.82633	0.06
2.82567	0.0425	2.82967	0.0325	2.831	0.0475	2.82833	0.0325	2.831	0.0475	2.83433	0.06
2.834	0.04	2.838	0.035	2.83867	0.0475	2.83633	0.03	2.839	0.0525	2.84233	0.06
2.842	0.04	2.84567	0.03	2.847	0.0475	2.84467	0.035	2.84733	0.045	2.85067	0.0625
2.85	0.0425	2.85367	0.04	2.85533	0.0475	2.85233	0.0325	2.85533	0.0475	2.85833	0.06
2.85833	0.0425	2.862	0.035	2.863	0.0475	2.86067	0.035	2.86333	0.045	2.86667	0.06
2.866	0.0425	2.87	0.035	2.87133	0.0475	2.86867	0.035	2.87167	0.045	2.87467	0.0575
2.874	0.0425	2.87833	0.035	2.87933	0.05	2.877	0.04	2.87933	0.05	2.88267	0.06
2.88233	0.04	2.886	0.035	2.88733	0.05	2.885	0.035	2.88767	0.045	2.891	0.06
2.89033	0.0375	2.89433	0.035	2.89567	0.05	2.893	0.035	2.89567	0.05	2.899	0.0575
2.89833	0.045	2.90233	0.035	2.90367	0.0475	2.901	0.0325	2.90367	0.0525	2.907	0.06
2.90633	0.0375	2.91033	0.0375	2.91167	0.0475	2.909	0.035	2.91167	0.055	2.915	0.0575
2.91467	0.0425	2.91833	0.035	2.91967	0.0525	2.917	0.035	2.91967	0.0525	2.92333	0.0625
2.92233	0.04	2.92633	0.035	2.92767	0.05	2.925	0.035	2.928	0.055	2.93133	0.06
2.93067	0.0425	2.93433	0.035	2.93567	0.045	2.93333	0.035	2.936	0.055	2.93933	0.0625
2.93867	0.04	2.94267	0.035	2.944	0.0525	2.94133	0.035	2.944	0.055	2.94733	0.0575
2.94667	0.0425	2.95067	0.035	2.952	0.0525	2.94933	0.035	2.952	0.0525	2.95533	0.06
2.95467	0.045	2.95867	0.0325	2.96	0.045	2.95733	0.035	2.96033	0.055	2.96333	0.0625
2.963	0.0425	2.96667	0.0425	2.968	0.05	2.96533	0.035	2.96833	0.0575	2.97167	0.065
2.97067	0.0425	2.97467	0.0375	2.97633	0.0525	2.97367	0.035	2.97633	0.055	2.97967	0.06
2.979	0.0375	2.98267	0.035	2.98433	0.05	2.98167	0.0325	2.98433	0.0525	2.98767	0.065
2.987	0.0425	2.991	0.035	2.99233	0.0525	2.98967	0.0325	2.99233	0.0525	2.996	0.0625
2.995	0.0425	2.999	0.0375	3.00033	0.045	2.99767	0.0375	3.00067	0.0525	3.004	0.0625
3.003	0.045	3.00733	0.035	3.00833	0.05	3.00567	0.0325	3.00867	0.055	3.012	0.06
3.011	0.0425	3.015	0.04	3.01667	0.0525	3.014	0.035	3.017	0.0525	3.02	0.065
3.01933	0.04	3.023	0.035	3.02467	0.05	3.022	0.035	3.02467	0.055	3.028	0.0625
3.02733	0.045	3.031	0.035	3.03267	0.0525	3.03	0.0375	3.03267	0.055	3.03633	0.06
3.03533	0.0425	3.03933	0.035	3.04067	0.0525	3.038	0.035	3.041	0.0525	3.04433	0.06
3.04333	0.04	3.04733	0.0375	3.04867	0.0525	3.046	0.035	3.04867	0.055	3.05233	0.0575
3.05133	0.045	3.05533	0.0375	3.057	0.0525	3.054	0.0375	3.057	0.055	3.06033	0.07
3.05967	0.0475	3.06333	0.0425	3.065	0.0525	3.06233	0.035	3.065	0.055	3.06833	0.0625
3.06767	0.045	3.07133	0.035	3.073	0.0525	3.07	0.0375	3.07333	0.06	3.07667	0.06
3.07567	0.04	3.07933	0.0375	3.081	0.055	3.07833	0.0325	3.081	0.055	3.08467	0.0575
3.08367	0.0425	3.08767	0.0325	3.089	0.0525	3.08633	0.0375	3.089	0.0575	3.09267	0.0675
3.09167	0.0425	3.09567	0.0375	3.097	0.0525	3.09433	0.035	3.09733	0.0525	3.101	0.065
3.1	0.0425	3.10367	0.035	3.10533	0.0525	3.10267	0.04	3.10533	0.055	3.109	0.0625
3.108	0.0425	3.11167	0.04	3.11333	0.0525	3.11033	0.0375	3.11333	0.0525	3.117	0.0625
3.116	0.045	3.11967	0.0375	3.12133	0.0525	3.11867	0.0375	3.12133	0.06	3.12533	0.07
3.124	0.0475	3.128	0.04	3.12933	0.0475	3.12667	0.035	3.12967	0.055	3.133	0.0675
3.132	0.0425	3.136	0.04	3.13733	0.0525	3.13467	0.035	3.13767	0.0575	3.141	0.06
3.14	0.045	3.144	0.04	3.14567	0.05	3.14267	0.035	3.14567	0.055	3.14933	0.0625
3.14833	0.0475	3.152	0.035	3.15367	0.055	3.15067	0.04	3.15367	0.06	3.15733	0.07
3.15633	0.0375	3.16	0.0425	3.16167	0.0475	3.159	0.035	3.16167	0.06	3.16567	0.065
3.16433	0.0425	3.16833	0.035	3.16967	0.055	3.167	0.0375	3.16967	0.06	3.17333	0.06
3.17233	0.0425	3.17633	0.04	3.178	0.0525	3.175	0.035	3.178	0.06	3.18167	0.0625
3.18033	0.0425	3.18433	0.0375	3.186	0.0575	3.183	0.04	3.186	0.06	3.18967	0.07
3.18833	0.045	3.19267	0.04	3.194	0.05	3.19133	0.0375	3.194	0.06	3.19767	0.065
3.19633	0.0475	3.20033	0.035	3.202	0.0575	3.199	0.0425	3.20233	0.06	3.20567	0.07
3.20467	0.0425	3.20867	0.04	3.21	0.055	3.20733	0.0375	3.21033	0.0575	3.214	0.06
3.21267	0.045	3.21667	0.0375	3.218	0.0525	3.21533	0.04	3.21833	0.06	3.222	0.07
3.22067	0.0475	3.22467	0.0425	3.22633	0.055	3.22333	0.04	3.22633	0.06	3.23	0.0625
3.229	0.0375	3.23267	0.04	3.23433	0.0575	3.23133	0.0375	3.23433	0.0575	3.238	0.07
3.23667	0.0475	3.24067	0.0375	3.24233	0.06	3.23933	0.035	3.24233	0.055	3.24633	0.065
3.245	0.0475	3.24867	0.035	3.25067	0.0575	3.24733	0.0375	3.25067	0.065	3.25433	0.07
3.253	0.045	3.257	0.0425	3.25867	0.05	3.25533	0.035	3.25867	0.0625	3.26267	0.0675
3.261	0.0425	3.265	0.04	3.26667	0.055	3.26367	0.04	3.26667	0.0575	3.27033	0.06
3.269	0.0425	3.273	0.0375	3.27467	0.055	3.27167	0.04	3.275	0.06	3.27867	0.07
3.27733	0.0475	3.281	0.04	3.28267	0.0575	3.27967	0.0375	3.283	0.065	3.28667	0.0725
3.285	0.045	3.289	0.0375	3.291	0.05	3.28767	0.0375	3.291	0.0575	3.29467	0.0625
3.293	0.0425	3.29733	0.04	3.29867	0.055	3.29567	0.04	3.299	0.06	3.30267	0.0675
3.30133	0.0425	3.30533	0.04	3.307	0.06	3.304	0.0425	3.30733	0.06	3.31067	0.07
3.30933	0.045	3.31333	0.0425	3.31533	0.0575	3.312	0.0375	3.31533	0.06	3.319	0.07
3.31767	0.045	3.32133	0.0425	3.323	0.0525	3.32	0.0425	3.32333	0.06	3.327	0.0675
3.32533	0.045	3.32933	0.04	3.33133	0.0525	3.328	0.04	3.33133	0.0625	3.33533	0.07
3.33367	0.045	3.33767	0.0475	3.33933	0.06	3.336	0.0375	3.33933	0.055	3.343	0.0675
3.34133	0.045	3.34567	0.035	3.34733	0.06	3.344	0.0425	3.34733	0.0575	3.35133	0.07
3.34967	0.045	3.35367	0.04	3.35533	0.05	3.352	0.0425	3.35567	0.0575	3.35933	0.0675
3.35767	0.0475	3.36167	0.04	3.36367	0.0525	3.36033	0.04	3.36367	0.06	3.36733	0.07
3.36567	0.0425	3.36967	0.0425	3.37167	0.06	3.36833	0.04	3.37167	0.055	3.37567	0.07
3.37367	0.0425	3.378	0.04	3.37933	0.0575	3.37633	0.0425	3.37967	0.06	3.38367	0.075
3.38167	0.0525	3.386	0.0425	3.38767	0.055	3.38433	0.0425	3.38767	0.06	3.39167	0.07
3.38967	0.045	3.394	0.0425	3.39567	0.055	3.39233	0.0425	3.396	0.055	3.39967	0.07
3.398	0.0475	3.402	0.0425	3.40367	0.0575	3.40067	0.0375	3.404	0.06	3.40767	0.0725
3.406	0.0475	3.41	0.0425	3.41167	0.06	3.40867	0.0425	3.412	0.0575	3.416	0.07
3.414	0.05	3.41833	0.045	3.42	0.0525	3.41667	0.0425	3.42	0.055	3.424	0.0725
3.422	0.045	3.42633	0.0425	3.428	0.06	3.42467	0.04	3.42833	0.0575	3.432	0.07
3.43	0.0425	3.43433	0.04	3.436	0.06	3.43267	0.0375	3.43633	0.0525	3.44	0.07
3.43833	0.0475	3.44233	0.045	3.444	0.06	3.441	0.0425	3.44433	0.06	3.448	0.075
3.446	0.05	3.45033	0.0425	3.452	0.0575	3.449	0.0425	3.45233	0.0525	3.45633	0.07
3.45433	0.0525	3.45833	0.0475	3.46033	0.055	3.457	0.04	3.46033	0.06	3.46433	0.0725
3.46233	0.0475	3.46667	0.04	3.46833	0.0575	3.465	0.0375	3.46867	0.055	3.47233	0.0675
3.47033	0.05	3.47467	0.0425	3.47633	0.0575	3.473	0.0425	3.47667	0.06	3.48033	0.0725
3.47833	0.0475	3.48267	0.045	3.48433	0.0575	3.481	0.0425	3.48467	0.0575	3.48833	0.07
3.48667	0.05	3.49067	0.04	3.49233	0.06	3.48933	0.0425	3.49267	0.06	3.49667	0.0725
3.49467	0.045	3.49867	0.0425	3.50067	0.0575	3.49733	0.0425	3.50067	0.055	3.50467	0.0725
3.50267	0.0525	3.507	0.04	3.50833	0.06	3.50533	0.045	3.509	0.06	3.51267	0.07
3.51067	0.0525	3.515	0.0425	3.51667	0.06	3.51333	0.0425	3.517	0.0575	3.521	0.0725
3.51867	0.0475	3.523	0.0425	3.52467	0.0575	3.52167	0.045	3.525	0.055	3.52867	0.075
3.52667	0.0475	3.531	0.04	3.53267	0.06	3.52933	0.0425	3.533	0.0525	3.537	0.07
3.535	0.0475	3.539	0.0425	3.54067	0.0625	3.53733	0.04	3.54133	0.065	3.545	0.0775
3.543	0.0525	3.54733	0.0475	3.549	0.055	3.54567	0.0475	3.54933	0.0575	3.553	0.07
3.551	0.0475	3.55533	0.0475	3.557	0.06	3.55367	0.0425	3.55733	0.06	3.56133	0.075
3.559	0.045	3.56333	0.0425	3.565	0.0575	3.56167	0.045	3.56533	0.0525	3.569	0.07
3.567	0.0525	3.57133	0.0425	3.573	0.06	3.56967	0.045	3.57367	0.0575	3.57733	0.075
3.575	0.05	3.57933	0.0425	3.581	0.0575	3.57767	0.0425	3.58167	0.0525	3.58567	0.07
3.583	0.0525	3.58733	0.0425	3.58933	0.06	3.586	0.045	3.58967	0.0575	3.59367	0.075
3.591	0.045	3.59567	0.0475	3.59733	0.0675	3.594	0.045	3.59767	0.0525	3.60167	0.0725
3.59933	0.055	3.60367	0.0425	3.60533	0.0625	3.602	0.0425	3.606	0.06	3.60967	0.075
3.60733	0.05	3.61167	0.0475	3.61333	0.0575	3.61	0.0475	3.614	0.055	3.61767	0.0775
3.61533	0.0525	3.61967	0.045	3.62167	0.0625	3.618	0.045	3.622	0.06	3.626	0.07
3.62333	0.0425	3.628	0.0425	3.62967	0.0625	3.626	0.0425	3.63	0.0525	3.634	0.07
3.63167	0.0525	3.636	0.0425	3.63767	0.0625	3.634	0.0475	3.638	0.0575	3.642	0.0775
3.63933	0.0525	3.644	0.0475	3.646	0.06	3.64233	0.045	3.64633	0.06	3.65	0.07
3.64767	0.055	3.652	0.0425	3.65367	0.06	3.65033	0.0425	3.65433	0.0625	3.65833	0.0725
3.65567	0.0525	3.66	0.0475	3.66167	0.0625	3.65833	0.0425	3.66233	0.0525	3.66633	0.0725
3.66367	0.05	3.668	0.0475	3.66967	0.0625	3.66633	0.0425	3.67033	0.0575	3.67433	0.0775
3.67167	0.0525	3.67633	0.045	3.678	0.065	3.67433	0.0425	3.67833	0.055	3.68233	0.07
3.67967	0.055	3.68433	0.05	3.686	0.0575	3.68233	0.045	3.68667	0.06	3.69033	0.0775
3.688	0.05	3.69233	0.0425	3.694	0.0625	3.69067	0.045	3.69467	0.0525	3.69833	0.0725
3.69567	0.045	3.70033	0.0425	3.70233	0.065	3.69867	0.05	3.70267	0.06	3.70667	0.0775
3.704	0.045	3.70833	0.045	3.71	0.06	3.70667	0.0425	3.71067	0.055	3.71467	0.0775
3.712	0.055	3.71667	0.0475	3.71833	0.0625	3.71467	0.0475	3.71867	0.06	3.72267	0.0775
3.72	0.0525	3.72467	0.0425	3.72633	0.0625	3.72267	0.0425	3.727	0.0575	3.73067	0.075
3.728	0.0525	3.73267	0.045	3.73433	0.0625	3.731	0.0425	3.735	0.06	3.739	0.075
3.73633	0.0525	3.74067	0.05	3.74233	0.06	3.73867	0.04	3.743	0.0625	3.747	0.0775
3.744	0.0525	3.74867	0.045	3.75067	0.0625	3.747	0.0475	3.751	0.0575	3.755	0.075
3.752	0.0475	3.757	0.045	3.75833	0.06	3.755	0.0425	3.759	0.0575	3.763	0.0725
3.76	0.0525	3.76467	0.045	3.76667	0.0675	3.763	0.05	3.76733	0.06	3.77133	0.0775
3.768	0.055	3.773	0.0475	3.77467	0.0625	3.77133	0.045	3.77533	0.0625	3.77933	0.0725
3.77633	0.0525	3.781	0.0475	3.78267	0.0625	3.77933	0.0475	3.78333	0.06	3.78733	0.0775
3.784	0.0525	3.789	0.0475	3.791	0.0625	3.78733	0.045	3.79133	0.055	3.79567	0.075
3.79233	0.0525	3.797	0.045	3.799	0.07	3.79533	0.0475	3.79933	0.06	3.80333	0.075
3.80033	0.055	3.805	0.05	3.807	0.06	3.80333	0.0425	3.80767	0.06	3.81167	0.0725
3.80833	0.055	3.81333	0.045	3.815	0.0675	3.81133	0.0475	3.81567	0.06	3.81967	0.075
3.81667	0.05	3.82133	0.045	3.823	0.065	3.81933	0.0425	3.82367	0.06	3.82767	0.0725
3.82433	0.0475	3.82933	0.045	3.83133	0.065	3.82767	0.0475	3.83167	0.0575	3.836	0.0725
3.83233	0.05	3.83733	0.0475	3.839	0.06	3.83567	0.045	3.83967	0.06	3.844	0.075
3.84033	0.055	3.84533	0.045	3.84733	0.06	3.84367	0.0475	3.848	0.0625	3.852	0.0775
3.84867	0.0525	3.85367	0.0475	3.85533	0.0675	3.85167	0.045	3.856	0.06	3.86	0.075
3.85667	0.05	3.86167	0.045	3.86333	0.0675	3.85967	0.0525	3.864	0.0675	3.86833	0.0775
3.86467	0.055	3.86967	0.05	3.87133	0.0625	3.86767	0.05	3.87233	0.065	3.87633	0.0775
3.87267	0.0575	3.87767	0.05	3.87967	0.065	3.876	0.05	3.88	0.065	3.88433	0.0775
3.88067	0.0525	3.88567	0.0475	3.88767	0.07	3.884	0.0475	3.88833	0.06	3.89233	0.0775
3.889	0.0525	3.894	0.0475	3.89567	0.07	3.892	0.045	3.89633	0.06	3.90033	0.0775
3.897	0.0575	3.902	0.05	3.90367	0.0625	3.9	0.045	3.90433	0.0625	3.90867	0.075
3.905	0.0575	3.91	0.0525	3.912	0.065	3.908	0.0525	3.91233	0.0675	3.91667	0.08
3.91333	0.0525	3.918	0.0525	3.92	0.06	3.91633	0.0475	3.92033	0.06	3.925	0.0775
3.92133	0.0525	3.92633	0.045	3.928	0.0675	3.92433	0.05	3.92867	0.06	3.933	0.0775
3.92933	0.0575	3.93433	0.0525	3.936	0.0625	3.93233	0.0475	3.93667	0.0625	3.941	0.075
3.93733	0.055	3.94233	0.0475	3.944	0.0675	3.94033	0.045	3.94467	0.065	3.949	0.07
3.94533	0.0525	3.95033	0.0525	3.952	0.07	3.94833	0.0525	3.95267	0.0575	3.957	0.075
3.95333	0.0525	3.95833	0.0425	3.96033	0.0675	3.95633	0.0475	3.96067	0.06	3.965	0.0775
3.96167	0.055	3.96633	0.05	3.96833	0.0625	3.96467	0.05	3.96867	0.065	3.973	0.0775
3.96933	0.055	3.97433	0.05	3.97633	0.065	3.97267	0.0525	3.97667	0.065	3.98133	0.08
3.97767	0.055	3.98267	0.05	3.98433	0.0675	3.98067	0.05	3.98467	0.06	3.98933	0.08
3.98567	0.0525	3.99067	0.0475	3.99233	0.07	3.98867	0.05	3.99267	0.0625	3.99767	0.0825
3.99367	0.055	3.99867	0.0525	4.00067	0.065	3.99667	0.045	4.00067	0.065	4.00567	0.0775
4.00167	0.06	4.007	0.0525	4.00833	0.0625	4.00467	0.0525	4.009	0.07	4.01367	0.0775
4.00967	0.0575	4.01467	0.0525	4.01667	0.07	4.013	0.05	4.017	0.065	4.02167	0.0775
4.01767	0.055	4.023	0.0525	4.02467	0.065	4.021	0.0525	4.025	0.06	4.02967	0.0825
4.026	0.055	4.031	0.0525	4.03267	0.065	4.029	0.045	4.033	0.0675	4.038	0.0875
4.034	0.0525	4.039	0.055	4.04067	0.07	4.037	0.0525	4.04133	0.0625	4.046	0.08
4.042	0.055	4.047	0.05	4.049	0.065	4.045	0.0525	4.049	0.065	4.054	0.0825
4.05	0.06	4.055	0.05	4.057	0.0675	4.05333	0.0525	4.05733	0.0675	4.062	0.085
4.058	0.0525	4.063	0.055	4.065	0.065	4.06133	0.045	4.06533	0.07	4.07033	0.0825
4.06633	0.0575	4.07133	0.0525	4.073	0.065	4.06933	0.05	4.07367	0.0675	4.07833	0.0775
4.07433	0.055	4.07933	0.0525	4.08133	0.07	4.07733	0.0475	4.08167	0.06	4.08633	0.08
4.08233	0.06	4.08733	0.0525	4.08933	0.07	4.08533	0.0525	4.08967	0.07	4.09433	0.0775
4.09033	0.0575	4.09533	0.0525	4.09733	0.0675	4.09333	0.055	4.09767	0.07	4.10267	0.08
4.09833	0.055	4.10367	0.0525	4.10533	0.0675	4.10167	0.055	4.10567	0.0675	4.11067	0.0825
4.10633	0.055	4.11167	0.055	4.11333	0.07	4.10933	0.0475	4.114	0.0675	4.11867	0.08
4.11433	0.0525	4.11967	0.0475	4.12167	0.0675	4.11767	0.0525	4.12167	0.07	4.127	0.08
4.12267	0.055	4.12767	0.0525	4.12967	0.065	4.12567	0.0525	4.13	0.0675	4.13467	0.08
4.13067	0.0575	4.13567	0.0525	4.13767	0.07	4.13367	0.0475	4.138	0.07	4.143	0.08
4.13867	0.0525	4.14367	0.055	4.146	0.07	4.142	0.0475	4.14633	0.065	4.151	0.0825
4.14667	0.0575	4.152	0.0525	4.15367	0.07	4.15	0.055	4.154	0.07	4.159	0.0775
4.155	0.0575	4.16	0.0525	4.162	0.07	4.158	0.055	4.16233	0.07	4.16733	0.0775
4.163	0.0625	4.168	0.0525	4.17	0.07	4.166	0.0575	4.17033	0.065	4.17533	0.08
4.171	0.0575	4.17633	0.0525	4.178	0.07	4.174	0.0525	4.17833	0.065	4.18333	0.08
4.179	0.0575	4.184	0.0575	4.186	0.0675	4.18233	0.0525	4.18633	0.07	4.19133	0.085
4.187	0.06	4.19233	0.06	4.194	0.065	4.19033	0.055	4.19433	0.0675	4.19967	0.08
4.195	0.06	4.2	0.055	4.202	0.07	4.19833	0.05	4.20267	0.0675	4.20767	0.085
4.203	0.0525	4.20833	0.055	4.21033	0.065	4.20633	0.05	4.21033	0.0675	4.21567	0.08
4.211	0.0575	4.21633	0.0525	4.21833	0.07	4.21433	0.06	4.21867	0.07	4.22367	0.085
4.219	0.0575	4.22433	0.055	4.22633	0.07	4.22233	0.055	4.22667	0.0675	4.23167	0.0875
4.22733	0.055	4.23233	0.055	4.23433	0.07	4.23033	0.0525	4.23467	0.0675	4.24	0.08
4.23533	0.055	4.24033	0.0525	4.24233	0.07	4.23833	0.0525	4.24267	0.065	4.248	0.08
4.24333	0.0625	4.24833	0.055	4.25067	0.07	4.24667	0.0575	4.251	0.0725	4.256	0.0875
4.25133	0.06	4.25667	0.06	4.25833	0.06	4.25467	0.0575	4.259	0.065	4.264	0.0875
4.25967	0.0575	4.26467	0.0525	4.26667	0.0675	4.26267	0.0525	4.267	0.07	4.27233	0.08
4.26733	0.0575	4.27267	0.0575	4.27467	0.0725	4.271	0.05	4.27533	0.07	4.28033	0.08
4.27567	0.0575	4.281	0.0525	4.28267	0.0725	4.27867	0.0525	4.283	0.07	4.28833	0.085
4.28367	0.06	4.289	0.055	4.29067	0.07	4.287	0.06	4.29133	0.07	4.29633	0.085
4.29167	0.06	4.297	0.055	4.299	0.07	4.295	0.0575	4.29933	0.0725	4.30467	0.0825
4.29967	0.0575	4.305	0.06	4.307	0.0725	4.303	0.0525	4.30733	0.0675	4.31267	0.085
4.308	0.0575	4.313	0.055	4.315	0.0725	4.311	0.055	4.31533	0.0725	4.32067	0.085
4.316	0.065	4.32133	0.055	4.323	0.0675	4.319	0.06	4.32367	0.0725	4.329	0.0825
4.324	0.065	4.329	0.055	4.33133	0.07	4.32733	0.06	4.33167	0.07	4.337	0.0925
4.332	0.0575	4.33733	0.0575	4.339	0.0775	4.33533	0.0525	4.33967	0.07	4.345	0.0825
4.34033	0.055	4.34533	0.0575	4.34733	0.0725	4.34333	0.06	4.34767	0.0775	4.353	0.0925
4.348	0.06	4.35333	0.0575	4.35533	0.065	4.35133	0.055	4.356	0.0675	4.361	0.09
4.35633	0.06	4.36133	0.0575	4.36333	0.0725	4.35933	0.06	4.364	0.0725	4.36933	0.0875
4.36433	0.0575	4.36933	0.0575	4.37133	0.0725	4.36767	0.05	4.372	0.07	4.37733	0.0875
4.37233	0.06	4.37733	0.06	4.37933	0.0775	4.37567	0.0525	4.38	0.075	4.38533	0.09
4.38033	0.06	4.38567	0.0575	4.38767	0.0675	4.38367	0.055	4.388	0.0725	4.39333	0.0875
4.38867	0.0625	4.39367	0.0575	4.39567	0.07	4.39167	0.055	4.39633	0.075	4.40133	0.0925
4.39667	0.06	4.40167	0.06	4.40367	0.075	4.39967	0.0525	4.40433	0.07	4.40967	0.0875
4.40467	0.06	4.40967	0.055	4.41167	0.0725	4.40767	0.0525	4.41233	0.075	4.41767	0.0925
4.41267	0.06	4.418	0.06	4.41967	0.07	4.416	0.06	4.42033	0.07	4.426	0.0925
4.42067	0.06	4.426	0.06	4.42767	0.0725	4.424	0.0575	4.42867	0.07	4.434	0.085
4.42867	0.06	4.434	0.06	4.436	0.0725	4.432	0.0575	4.43667	0.07	4.442	0.0875
4.437	0.06	4.442	0.055	4.444	0.0725	4.44	0.06	4.44467	0.0775	4.45	0.095
4.445	0.0625	4.45	0.06	4.452	0.0725	4.448	0.0575	4.45267	0.07	4.45833	0.0925
4.453	0.06	4.458	0.06	4.46	0.07	4.456	0.0575	4.46067	0.0775	4.466	0.0925
4.461	0.0625	4.46633	0.06	4.468	0.075	4.46433	0.055	4.469	0.0725	4.47433	0.09
4.469	0.0625	4.47433	0.0575	4.47633	0.075	4.47233	0.06	4.477	0.075	4.48233	0.0925
4.477	0.06	4.48233	0.06	4.48433	0.07	4.48033	0.06	4.485	0.07	4.49033	0.0875
4.48533	0.06	4.49033	0.06	4.49233	0.07	4.48833	0.065	4.493	0.075	4.49867	0.095
4.49333	0.06	4.49833	0.06	4.50033	0.075	4.49633	0.055	4.501	0.07	4.50667	0.09
4.50133	0.0625	4.50667	0.06	4.50833	0.0775	4.50433	0.06	4.509	0.075	4.51467	0.095
4.50933	0.065	4.51467	0.06	4.51667	0.07	4.51267	0.06	4.51733	0.08	4.52267	0.095
4.51733	0.065	4.52267	0.065	4.52467	0.0725	4.52067	0.06	4.52533	0.07	4.53067	0.0875
4.52567	0.06	4.53067	0.06	4.53267	0.075	4.52867	0.06	4.53333	0.0725	4.539	0.095
4.53367	0.06	4.539	0.0575	4.54067	0.0775	4.53667	0.055	4.54167	0.0775	4.547	0.0975
4.54167	0.065	4.547	0.0625	4.54867	0.0725	4.54467	0.0575	4.54933	0.0725	4.555	0.09
4.54967	0.0625	4.555	0.055	4.557	0.075	4.55267	0.0625	4.55767	0.0725	4.563	0.0925
4.55767	0.0625	4.563	0.06	4.565	0.075	4.561	0.06	4.56567	0.075	4.57133	0.095
4.566	0.06	4.571	0.0575	4.573	0.0775	4.569	0.06	4.57367	0.075	4.57933	0.1025
4.574	0.0625	4.579	0.0625	4.581	0.07	4.577	0.06	4.58167	0.0725	4.58733	0.0975
4.582	0.0625	4.58733	0.0625	4.589	0.0725	4.585	0.06	4.59	0.0775	4.59567	0.1
4.59	0.06	4.59533	0.0625	4.597	0.075	4.593	0.055	4.598	0.0725	4.60367	0.095
4.598	0.06	4.603	0.06	4.60533	0.0775	4.60133	0.06	4.606	0.0775	4.61167	0.095
4.606	0.0625	4.61133	0.0625	4.613	0.075	4.60933	0.06	4.614	0.07	4.61967	0.0975
4.614	0.065	4.61933	0.0625	4.62133	0.0775	4.61733	0.06	4.622	0.0775	4.628	0.1
4.622	0.06	4.62733	0.06	4.62933	0.0775	4.62533	0.0575	4.63033	0.075	4.63567	0.095
4.63033	0.06	4.63533	0.055	4.63733	0.0775	4.63333	0.0625	4.63833	0.075	4.644	0.105
4.63833	0.065	4.64333	0.0625	4.64567	0.0725	4.64167	0.06	4.64633	0.0725	4.652	0.095
4.64633	0.065	4.65133	0.065	4.65367	0.0725	4.64967	0.0625	4.65433	0.08	4.66	0.1025
4.65433	0.06	4.65967	0.0625	4.66167	0.0775	4.65767	0.055	4.66233	0.0725	4.66833	0.095
4.66267	0.0575	4.66767	0.06	4.66967	0.08	4.66567	0.06	4.67067	0.075	4.67633	0.095
4.67067	0.0625	4.676	0.0625	4.67767	0.0775	4.67367	0.0675	4.67867	0.0775	4.68433	0.095
4.67867	0.0625	4.68367	0.06	4.686	0.0775	4.682	0.06	4.687	0.0775	4.69233	0.1025
4.68667	0.06	4.69167	0.065	4.694	0.0775	4.69	0.0575	4.69467	0.07	4.70033	0.095
4.69467	0.06	4.69933	0.06	4.702	0.0775	4.698	0.06	4.703	0.075	4.70867	0.1025
4.70267	0.07	4.70767	0.06	4.71	0.0775	4.706	0.0625	4.711	0.0825	4.71667	0.095
4.71067	0.0725	4.71567	0.06	4.718	0.0775	4.714	0.065	4.719	0.08	4.72467	0.0975
4.71867	0.065	4.72367	0.065	4.72633	0.08	4.722	0.06	4.72733	0.0775	4.73267	0.095
4.727	0.0625	4.732	0.0625	4.73433	0.0775	4.73033	0.0575	4.73533	0.0825	4.741	0.105
4.735	0.0675	4.73967	0.0625	4.74233	0.0725	4.73833	0.06	4.74333	0.0775	4.749	0.095
4.743	0.0675	4.748	0.0675	4.75033	0.0775	4.74633	0.06	4.75133	0.08	4.757	0.1
4.751	0.065	4.756	0.065	4.75833	0.08	4.75433	0.06	4.75933	0.0725	4.76533	0.0975
4.759	0.06	4.764	0.0575	4.76667	0.085	4.76233	0.06	4.76733	0.08	4.77333	0.1
4.76733	0.07	4.772	0.06	4.77467	0.0775	4.77067	0.0675	4.77533	0.075	4.78133	0.095
4.77533	0.065	4.78033	0.06	4.78267	0.075	4.77833	0.065	4.78367	0.08	4.78933	0.1025
4.78333	0.065	4.78833	0.07	4.79067	0.0775	4.78667	0.06	4.79167	0.08	4.79733	0.0975
4.79133	0.0625	4.79633	0.06	4.79867	0.085	4.79467	0.06	4.79967	0.0775	4.80533	0.1
4.79933	0.065	4.80433	0.06	4.807	0.0775	4.80267	0.0625	4.808	0.0775	4.81367	0.095
4.80733	0.07	4.81233	0.065	4.815	0.0775	4.811	0.07	4.816	0.0775	4.82167	0.095
4.81567	0.07	4.82067	0.0675	4.823	0.08	4.81867	0.06	4.824	0.0775	4.82967	0.095
4.82333	0.0625	4.82867	0.06	4.831	0.08	4.827	0.0625	4.83233	0.0775	4.83767	0.095
4.83167	0.0675	4.83667	0.0625	4.839	0.08	4.835	0.065	4.84	0.0825	4.846	0.095
4.83967	0.0675	4.84467	0.065	4.84733	0.0825	4.843	0.0625	4.84833	0.0775	4.854	0.095
4.84767	0.065	4.85267	0.07	4.85533	0.08	4.851	0.06	4.85633	0.085	4.862	0.095
4.85567	0.0675	4.861	0.065	4.86333	0.085	4.85933	0.0625	4.86433	0.0825	4.87033	0.0975
4.86367	0.0675	4.869	0.06	4.87133	0.0775	4.86733	0.065	4.87233	0.0775	4.87833	0.0925
4.872	0.07	4.877	0.065	4.87933	0.08	4.87533	0.065	4.88033	0.0775	4.88633	0.0975
4.88	0.0625	4.885	0.07	4.88767	0.0875	4.88333	0.07	4.88867	0.0775	4.89433	0.095
4.888	0.0675	4.893	0.0625	4.89567	0.0775	4.89133	0.065	4.89667	0.0775	4.90267	0.095
4.896	0.0675	4.901	0.0675	4.90367	0.0775	4.89967	0.0625	4.90467	0.0775	4.91067	0.0975
4.904	0.07	4.909	0.0625	4.91167	0.0825	4.90733	0.07	4.91267	0.085	4.91867	0.1
4.912	0.07	4.91733	0.0625	4.92	0.08	4.91567	0.06	4.92067	0.08	4.92667	0.0925
4.92	0.0675	4.92533	0.065	4.92767	0.08	4.92367	0.065	4.929	0.085	4.935	0.1
4.92833	0.0675	4.93333	0.065	4.936	0.08	4.93167	0.07	4.937	0.08	4.943	0.095
4.93633	0.07	4.94133	0.065	4.944	0.0875	4.94	0.07	4.945	0.085	4.951	0.1
4.94433	0.065	4.94967	0.0675	4.952	0.08	4.94767	0.065	4.953	0.0775	4.95933	0.0975
4.95233	0.065	4.95767	0.06	4.96033	0.0875	4.956	0.07	4.961	0.0825	4.96733	0.1
4.96033	0.0675	4.96567	0.0625	4.968	0.0825	4.964	0.07	4.96933	0.0825	4.97533	0.095
4.96833	0.07	4.97367	0.07	4.97633	0.0825	4.972	0.0725	4.97733	0.085	4.98333	0.1
4.97633	0.07	4.98167	0.07	4.98433	0.085	4.98033	0.065	4.98533	0.0825	4.99133	0.095
4.98467	0.065	4.98967	0.065	4.99233	0.0875	4.98833	0.0675	4.99333	0.0825	4.99967	0.0975
4.99267	0.065	4.998	0.07	5.00067	0.08	4.99633	0.065	5.00167	0.085	5.00767	0.0975
5.00067	0.07	5.006	0.0675	5.00833	0.0825	5.00433	0.07	5.00967	0.0825	5.01567	0.1
5.00867	0.0625	5.014	0.07	5.01667	0.0875	5.01233	0.065	5.01767	0.0775	5.02367	0.095
5.017	0.0675	5.022	0.065	5.02467	0.08	5.02033	0.0625	5.02567	0.0825	5.032	0.1
5.025	0.07	5.03	0.0675	5.03267	0.08	5.02833	0.0675	5.03367	0.085	5.04	0.1025
5.033	0.0725	5.038	0.0675	5.04067	0.0875	5.03667	0.0725	5.04167	0.085	5.048	0.0975
5.041	0.0675	5.04633	0.07	5.04867	0.0875	5.04467	0.07	5.05	0.0775	5.056	0.0975
5.049	0.0675	5.05433	0.065	5.057	0.0875	5.05267	0.065	5.058	0.0875	5.064	0.0975
5.057	0.075	5.06233	0.0675	5.065	0.0825	5.06067	0.07	5.066	0.0875	5.07233	0.0975
5.06533	0.0725	5.07033	0.07	5.073	0.085	5.06867	0.07	5.074	0.0875	5.08033	0.1025
5.07333	0.07	5.07833	0.0675	5.08133	0.0875	5.07667	0.0725	5.082	0.085	5.08833	0.095
5.08133	0.065	5.08667	0.0625	5.08933	0.0875	5.085	0.0625	5.09033	0.085	5.09633	0.0975
5.08933	0.07	5.09467	0.07	5.09733	0.0775	5.093	0.07	5.09833	0.0875	5.10467	0.0975
5.09733	0.0725	5.10267	0.0675	5.10533	0.0825	5.101	0.0725	5.10633	0.09	5.11267	0.1025
5.10533	0.07	5.11067	0.07	5.11333	0.0875	5.109	0.07	5.11467	0.085	5.12067	0.1
5.11367	0.07	5.11867	0.065	5.12167	0.0875	5.117	0.07	5.12267	0.0875	5.12867	0.0975
5.12167	0.07	5.127	0.07	5.12967	0.0825	5.12533	0.07	5.13067	0.0875	5.137	0.1025
5.12967	0.075	5.135	0.07	5.13767	0.09	5.133	0.0675	5.13867	0.085	5.145	0.1
5.13767	0.065	5.143	0.07	5.146	0.0925	5.14133	0.0675	5.14667	0.0875	5.153	0.1
5.14567	0.07	5.151	0.0675	5.15367	0.0875	5.14933	0.0775	5.15467	0.0875	5.16133	0.105
5.154	0.07	5.159	0.0725	5.16167	0.08	5.15733	0.07	5.163	0.0875	5.16933	0.1025
5.162	0.07	5.16733	0.0675	5.16967	0.0875	5.16533	0.07	5.171	0.0825	5.17733	0.105
5.17	0.07	5.17533	0.0675	5.178	0.09	5.17333	0.0675	5.179	0.0875	5.18533	0.1
5.178	0.075	5.18333	0.07	5.186	0.085	5.18167	0.075	5.187	0.09	5.19333	0.1075
5.186	0.0725	5.19133	0.0725	5.194	0.085	5.18967	0.0725	5.195	0.09	5.20167	0.1
5.19433	0.075	5.19933	0.07	5.202	0.0875	5.19767	0.075	5.20333	0.0925	5.20967	0.1025
5.20233	0.0725	5.20767	0.0725	5.21033	0.09	5.20567	0.07	5.21133	0.0875	5.21767	0.1025
5.21033	0.075	5.21567	0.0675	5.218	0.0825	5.214	0.0725	5.21933	0.0925	5.226	0.1075
5.21833	0.0775	5.22367	0.07	5.22633	0.0825	5.222	0.07	5.22767	0.0925	5.234	0.095
5.22633	0.0725	5.23167	0.07	5.23433	0.09	5.23	0.0725	5.23567	0.09	5.242	0.1025
5.23467	0.07	5.23967	0.07	5.24233	0.09	5.238	0.0725	5.24367	0.0875	5.25	0.1025
5.24267	0.0725	5.248	0.07	5.25067	0.0875	5.246	0.075	5.25167	0.095	5.25833	0.105
5.25067	0.075	5.256	0.07	5.25867	0.085	5.254	0.07	5.25967	0.0925	5.26633	0.1
5.25867	0.075	5.264	0.065	5.26667	0.0875	5.262	0.07	5.268	0.095	5.27433	0.0975
5.26667	0.07	5.272	0.07	5.275	0.0875	5.27033	0.07	5.276	0.0875	5.28233	0.1025
5.27467	0.07	5.28	0.0675	5.28267	0.09	5.27833	0.0725	5.284	0.0925	5.29067	0.1025
5.28267	0.075	5.288	0.07	5.291	0.085	5.28633	0.0725	5.292	0.095	5.29867	0.105
5.29067	0.0775	5.29633	0.07	5.299	0.0875	5.29433	0.0725	5.30033	0.09	5.30667	0.1025
5.299	0.0725	5.30433	0.07	5.307	0.0925	5.30233	0.07	5.30833	0.0925	5.31467	0.105
5.307	0.07	5.31233	0.07	5.315	0.0875	5.31067	0.0775	5.31633	0.095	5.32267	0.105
5.315	0.0725	5.32033	0.0725	5.323	0.0875	5.31867	0.0725	5.32433	0.095	5.331	0.1075
5.323	0.0775	5.32833	0.0725	5.33133	0.0925	5.32667	0.0775	5.33233	0.095	5.339	0.105
5.33133	0.07	5.33667	0.075	5.33933	0.0925	5.33467	0.0725	5.34033	0.0925	5.347	0.105
5.33933	0.0775	5.34467	0.07	5.34733	0.095	5.34267	0.0775	5.34867	0.0975	5.35533	0.105
5.347	0.0725	5.35267	0.0725	5.35533	0.09	5.35067	0.075	5.35667	0.095	5.363	0.105
5.35533	0.0775	5.36067	0.075	5.36333	0.0875	5.359	0.0775	5.36467	0.0975	5.37133	0.1075
5.36333	0.0775	5.36867	0.075	5.37167	0.0925	5.367	0.075	5.37267	0.09	5.37933	0.1075
5.37133	0.0725	5.377	0.07	5.37967	0.085	5.375	0.0775	5.38067	0.095	5.38767	0.1075
5.37933	0.08	5.385	0.0725	5.38767	0.0875	5.383	0.0775	5.389	0.0975	5.39567	0.105
5.38733	0.075	5.39333	0.075	5.39567	0.0875	5.39133	0.07	5.397	0.0975	5.40367	0.105
5.39567	0.0725	5.401	0.075	5.40367	0.0875	5.39933	0.0725	5.405	0.0925	5.41167	0.11
5.40367	0.075	5.409	0.07	5.412	0.09	5.40733	0.0725	5.413	0.0975	5.41967	0.11
5.41167	0.0725	5.41733	0.0725	5.42	0.0875	5.41533	0.0725	5.421	0.0975	5.428	0.11
5.41967	0.0775	5.42533	0.07	5.428	0.0875	5.42333	0.0725	5.42933	0.0975	5.436	0.105
5.42767	0.0725	5.43333	0.0725	5.436	0.09	5.43133	0.07	5.43733	0.0925	5.444	0.105
5.436	0.0775	5.44133	0.07	5.444	0.09	5.43967	0.0725	5.44533	0.095	5.45233	0.11
5.444	0.0775	5.44933	0.0775	5.45233	0.0875	5.44767	0.0725	5.45333	0.1	5.46033	0.1075
5.452	0.0825	5.45733	0.0725	5.46033	0.0875	5.45567	0.07	5.46133	0.095	5.46833	0.1125
5.46	0.0775	5.46567	0.075	5.46833	0.095	5.46367	0.0675	5.46933	0.095	5.47633	0.1075
5.468	0.075	5.47367	0.0725	5.47633	0.09	5.47167	0.07	5.47767	0.105	5.48433	0.11
5.476	0.0775	5.48167	0.0775	5.48433	0.09	5.48	0.0675	5.48567	0.1	5.49267	0.11
5.48433	0.0775	5.49	0.07	5.49233	0.095	5.488	0.07	5.49367	0.0975	5.50067	0.105
5.49233	0.0725	5.498	0.075	5.50067	0.0925	5.496	0.07	5.50167	0.095	5.50867	0.1125
5.50033	0.0775	5.506	0.075	5.50833	0.0875	5.504	0.0725	5.50967	0.1025	5.517	0.11
5.50833	0.0775	5.514	0.0725	5.51633	0.0875	5.512	0.075	5.518	0.1	5.525	0.1125
5.51633	0.0825	5.522	0.0775	5.52433	0.0975	5.52033	0.07	5.526	0.095	5.533	0.1125
5.52467	0.075	5.53	0.075	5.53233	0.095	5.52833	0.07	5.534	0.0975	5.541	0.1075
5.53233	0.085	5.538	0.075	5.54067	0.0925	5.53633	0.07	5.542	0.105	5.549	0.115
5.54067	0.0775	5.54633	0.075	5.54867	0.09	5.54433	0.07	5.55033	0.0975	5.55733	0.1125
5.54867	0.0775	5.55433	0.075	5.55667	0.095	5.55233	0.075	5.55833	0.1	5.56533	0.1125
5.55667	0.075	5.56233	0.0725	5.56467	0.095	5.56067	0.07	5.56633	0.095	5.57333	0.1125
5.56467	0.075	5.57033	0.075	5.573	0.09	5.56833	0.07	5.57433	0.095	5.58167	0.1125
5.573	0.0775	5.57833	0.0775	5.581	0.0875	5.57667	0.075	5.58233	0.0975	5.58967	0.1125
5.581	0.0825	5.58667	0.0775	5.589	0.0875	5.58467	0.07	5.59033	0.105	5.59767	0.115
5.589	0.0775	5.59467	0.0775	5.597	0.095	5.59267	0.07	5.59867	0.095	5.60567	0.1125
5.597	0.0825	5.60267	0.0775	5.605	0.09	5.60067	0.0775	5.60667	0.1	5.61367	0.11
5.605	0.0775	5.61067	0.0775	5.613	0.0875	5.60867	0.075	5.61467	0.1025	5.622	0.1125
5.61333	0.0875	5.61867	0.0775	5.62133	0.0925	5.617	0.075	5.62267	0.1025	5.63	0.1125
5.621	0.08	5.627	0.075	5.629	0.095	5.625	0.07	5.63067	0.0975	5.638	0.1125
5.62933	0.0775	5.635	0.075	5.63733	0.0925	5.633	0.075	5.639	0.1	5.64633	0.1175
5.63733	0.08	5.643	0.0825	5.64567	0.095	5.641	0.075	5.647	0.1025	5.654	0.1125
5.64533	0.085	5.651	0.0775	5.65333	0.09	5.649	0.075	5.655	0.1025	5.66233	0.1125
5.65367	0.0775	5.659	0.08	5.66167	0.095	5.65733	0.07	5.663	0.095	5.67067	0.1175
5.66133	0.08	5.66733	0.0775	5.66967	0.0925	5.66533	0.0775	5.671	0.105	5.67833	0.1125
5.66967	0.0775	5.67533	0.08	5.67767	0.0925	5.67333	0.075	5.67933	0.1	5.68667	0.1125
5.67733	0.0775	5.68333	0.08	5.68567	0.095	5.68133	0.075	5.68733	0.105	5.69467	0.1125
5.68567	0.08	5.69133	0.08	5.69367	0.095	5.68933	0.075	5.69533	0.095	5.703	0.1175
5.69367	0.0775	5.69933	0.0775	5.702	0.095	5.69767	0.075	5.70333	0.1075	5.71067	0.1175
5.70167	0.0825	5.70767	0.0775	5.71	0.0925	5.70567	0.0725	5.71133	0.1025	5.719	0.1125
5.71	0.085	5.71567	0.0825	5.718	0.09	5.71367	0.0775	5.71967	0.1	5.727	0.115
5.71767	0.085	5.72367	0.085	5.726	0.095	5.72167	0.0775	5.72767	0.1	5.735	0.12
5.726	0.085	5.73167	0.08	5.734	0.095	5.73	0.075	5.73567	0.1025	5.74333	0.1175
5.734	0.0825	5.73967	0.085	5.742	0.095	5.73767	0.0725	5.74367	0.105	5.75133	0.115
5.742	0.0775	5.74767	0.085	5.75033	0.095	5.746	0.075	5.75167	0.105	5.75933	0.1175
5.75	0.08	5.75567	0.08	5.75833	0.095	5.754	0.0725	5.75967	0.1025	5.76733	0.1175
5.75833	0.0875	5.764	0.0775	5.76633	0.0975	5.762	0.0725	5.768	0.1025	5.77567	0.12
5.76633	0.0825	5.772	0.08	5.77467	0.095	5.77033	0.0775	5.776	0.105	5.78367	0.115
5.77433	0.0825	5.78	0.085	5.78233	0.095	5.778	0.075	5.784	0.105	5.79167	0.1175
5.78233	0.0825	5.78833	0.085	5.79067	0.095	5.78633	0.0775	5.792	0.11	5.79967	0.1175
5.79033	0.08	5.79633	0.0875	5.79867	0.0925	5.79433	0.0775	5.8	0.105	5.80767	0.12
5.79833	0.08	5.80433	0.0875	5.80667	0.095	5.80233	0.0725	5.80833	0.1075	5.816	0.1175
5.80633	0.08	5.81233	0.0825	5.815	0.0975	5.81067	0.08	5.81633	0.11	5.824	0.115
5.81467	0.0775	5.82033	0.0825	5.82267	0.105	5.81833	0.0775	5.82433	0.105	5.83233	0.115
5.82267	0.0775	5.82833	0.08	5.831	0.095	5.82667	0.0775	5.83233	0.1075	5.84	0.1225
5.83067	0.085	5.83667	0.085	5.839	0.095	5.83467	0.075	5.84033	0.105	5.84833	0.1175
5.83867	0.085	5.84467	0.0825	5.847	0.0975	5.84267	0.0775	5.84867	0.1075	5.85633	0.115
5.84667	0.0825	5.85267	0.0775	5.855	0.095	5.85067	0.0775	5.85667	0.105	5.86433	0.115
5.855	0.08	5.86067	0.085	5.863	0.095	5.85867	0.0725	5.86467	0.1075	5.87267	0.115
5.86267	0.0875	5.86867	0.0825	5.87133	0.0925	5.867	0.0775	5.87267	0.11	5.88067	0.115
5.871	0.08	5.877	0.0875	5.87933	0.0925	5.875	0.08	5.88067	0.1075	5.88867	0.1175
5.879	0.0775	5.885	0.0825	5.88733	0.1	5.88267	0.0775	5.889	0.105	5.89667	0.12
5.887	0.08	5.893	0.0825	5.89533	0.1	5.891	0.0775	5.897	0.1075	5.90467	0.12
5.895	0.085	5.901	0.085	5.90367	0.095	5.899	0.0775	5.905	0.1075	5.913	0.1225
5.90333	0.0825	5.909	0.0875	5.91133	0.095	5.907	0.08	5.913	0.1075	5.921	0.12
5.91133	0.08	5.917	0.0825	5.91933	0.095	5.91533	0.08	5.921	0.1075	5.92933	0.115
5.91933	0.08	5.92533	0.0825	5.92733	0.105	5.923	0.0775	5.92933	0.1125	5.93733	0.1175
5.92733	0.0875	5.93333	0.085	5.93567	0.095	5.93133	0.0775	5.93733	0.1075	5.94533	0.115
5.93533	0.09	5.94133	0.0875	5.94333	0.0975	5.93933	0.0775	5.94533	0.11	5.95333	0.1225
5.94367	0.08	5.94933	0.085	5.95167	0.1	5.94733	0.075	5.95333	0.105	5.96133	0.1175
5.95133	0.0775	5.95733	0.0825	5.95967	0.1	5.95567	0.08	5.96133	0.1075	5.96933	0.1125
5.95967	0.0825	5.96567	0.0875	5.96767	0.095	5.96333	0.08	5.96967	0.11	5.97767	0.1175
5.96767	0.085	5.97333	0.08	5.976	0.1	5.97167	0.08	5.97767	0.11	5.98567	0.1175
5.97567	0.0875	5.98167	0.085	5.984	0.1025	5.97967	0.08	5.98567	0.1075	5.99367	0.12
5.984	0.08	5.98967	0.0825	5.992	0.1025	5.98767	0.0775	5.99367	0.1125	6.002	0.1175
5.99167	0.0875	5.99767	0.0875	6	0.0975	5.996	0.075	6.00167	0.105	6.01	0.12
6	0.085	6.006	0.0875	6.008	0.1	6.00367	0.08	6.01	0.1125	6.018	0.1175
6.008	0.08	6.01367	0.0875	6.016	0.1025	6.012	0.085	6.018	0.1125	6.026	0.12
6.016	0.0825	6.022	0.085	6.024	0.1025	6.02	0.0775	6.026	0.11	6.034	0.12
6.024	0.09	6.03	0.0875	6.03233	0.1	6.028	0.08	6.034	0.1075	6.04233	0.1225
6.032	0.0825	6.038	0.09	6.04033	0.095	6.036	0.08	6.042	0.11	6.05033	0.1225
6.04	0.0825	6.046	0.0825	6.04833	0.1025	6.04433	0.0775	6.05	0.1075	6.05833	0.1175
6.048	0.0875	6.054	0.085	6.05633	0.095	6.052	0.0775	6.05833	0.1075	6.06633	0.1225
6.05633	0.0875	6.06233	0.0875	6.06467	0.095	6.06033	0.0775	6.06633	0.1075	6.07467	0.1225
6.06433	0.0875	6.07033	0.0875	6.07267	0.0975	6.06833	0.0825	6.07433	0.1075	6.08267	0.12
6.07233	0.0825	6.07833	0.09	6.08067	0.1025	6.07633	0.08	6.08233	0.1125	6.09067	0.1175
6.08033	0.08	6.08633	0.0875	6.08867	0.105	6.08467	0.0825	6.09067	0.105	6.09867	0.1175
6.08833	0.0875	6.09467	0.09	6.09667	0.0975	6.09233	0.0775	6.09867	0.1125	6.107	0.1225
6.09633	0.0875	6.10267	0.0875	6.10467	0.0975	6.10067	0.0825	6.10667	0.1075	6.115	0.12
6.10467	0.0825	6.11067	0.0875	6.113	0.1025	6.10867	0.0825	6.11467	0.11	6.123	0.1225
6.11267	0.085	6.11867	0.0875	6.12067	0.1025	6.11667	0.085	6.12267	0.11	6.131	0.12
6.12067	0.085	6.127	0.09	6.129	0.095	6.125	0.08	6.13067	0.1075	6.13933	0.12
6.12867	0.0825	6.135	0.0875	6.137	0.1	6.13267	0.0825	6.139	0.11	6.14733	0.12
6.13667	0.0825	6.14267	0.0925	6.14533	0.1025	6.141	0.0775	6.147	0.11	6.15533	0.12
6.145	0.0875	6.151	0.0875	6.153	0.1025	6.149	0.0875	6.155	0.105	6.16367	0.1225
6.153	0.0875	6.159	0.0875	6.16133	0.1	6.157	0.0825	6.163	0.1125	6.17133	0.1225
6.161	0.0825	6.167	0.0925	6.16933	0.105	6.165	0.08	6.17133	0.1125	6.17967	0.1225
6.169	0.0825	6.17533	0.0875	6.17733	0.105	6.173	0.08	6.17933	0.1075	6.18767	0.13
6.177	0.0875	6.183	0.0875	6.18533	0.1025	6.18133	0.0875	6.18733	0.1075	6.19567	0.125
6.185	0.09	6.19133	0.095	6.19333	0.095	6.18933	0.085	6.19533	0.1125	6.204	0.125
6.193	0.0875	6.19933	0.09	6.20167	0.1	6.19733	0.0825	6.20367	0.11	6.212	0.1225
6.20133	0.085	6.20733	0.0875	6.20967	0.105	6.20533	0.085	6.21167	0.11	6.22	0.13
6.20933	0.09	6.21533	0.09	6.21767	0.1025	6.21333	0.0825	6.21967	0.1125	6.228	0.125
6.21733	0.09	6.22367	0.09	6.22567	0.105	6.22167	0.09	6.22767	0.11	6.236	0.1225
6.22533	0.0875	6.23167	0.09	6.234	0.105	6.22967	0.0825	6.23567	0.1125	6.24433	0.1225
6.23333	0.085	6.23967	0.095	6.242	0.105	6.23767	0.08	6.244	0.11	6.25233	0.1225
6.24133	0.09	6.248	0.0875	6.25	0.105	6.24567	0.0875	6.252	0.115	6.26067	0.1275
6.24933	0.0925	6.25567	0.09	6.258	0.1025	6.25367	0.0925	6.26	0.1125	6.26867	0.125
6.25767	0.09	6.264	0.09	6.266	0.105	6.262	0.08	6.268	0.1125	6.27667	0.1225
6.26567	0.085	6.27167	0.0925	6.27433	0.105	6.27	0.08	6.27633	0.1125	6.28467	0.125
6.27367	0.085	6.28	0.0875	6.282	0.1025	6.278	0.085	6.28433	0.11	6.293	0.1175
6.28167	0.0875	6.288	0.0875	6.29033	0.105	6.286	0.0925	6.29233	0.115	6.301	0.13
6.29	0.0875	6.296	0.0875	6.29833	0.1075	6.294	0.0875	6.30033	0.115	6.309	0.13
6.298	0.0875	6.304	0.09	6.30633	0.105	6.302	0.085	6.30833	0.1125	6.317	0.1275
6.306	0.085	6.312	0.09	6.31467	0.105	6.31033	0.0825	6.31667	0.1125	6.325	0.1225
6.314	0.095	6.32033	0.095	6.32267	0.1075	6.31833	0.0875	6.32467	0.12	6.33333	0.1275
6.322	0.09	6.32833	0.0925	6.33067	0.105	6.32633	0.0875	6.33267	0.115	6.34133	0.1225
6.33	0.0875	6.33633	0.09	6.33867	0.105	6.33433	0.0875	6.34067	0.115	6.34933	0.1275
6.33833	0.0875	6.34433	0.0875	6.34667	0.11	6.34233	0.0825	6.349	0.1125	6.35733	0.1275
6.346	0.0925	6.35233	0.0925	6.355	0.1	6.35067	0.09	6.357	0.1125	6.36567	0.13
6.35433	0.09	6.36067	0.0925	6.363	0.105	6.35867	0.09	6.365	0.115	6.37367	0.1275
6.36233	0.0875	6.36867	0.0925	6.371	0.1025	6.36667	0.085	6.373	0.115	6.38167	0.125
6.37033	0.09	6.37667	0.0875	6.379	0.1075	6.37467	0.0875	6.381	0.115	6.38967	0.13
6.37833	0.0925	6.38467	0.0925	6.387	0.1025	6.38267	0.09	6.38933	0.1175	6.398	0.13
6.38633	0.09	6.39267	0.095	6.39533	0.1025	6.39067	0.0875	6.39733	0.1175	6.406	0.1275
6.39467	0.0875	6.40067	0.095	6.40333	0.1025	6.399	0.085	6.40533	0.1175	6.414	0.13
6.40267	0.09	6.40833	0.0875	6.41133	0.1075	6.407	0.085	6.41333	0.1125	6.422	0.1275
6.41067	0.095	6.41667	0.095	6.41933	0.105	6.415	0.09	6.42133	0.115	6.43	0.13
6.41867	0.0925	6.42467	0.09	6.42733	0.105	6.423	0.0825	6.42967	0.1125	6.438	0.1325
6.42667	0.0875	6.433	0.0875	6.43533	0.105	6.43133	0.0875	6.43767	0.115	6.446	0.1325
6.43467	0.09	6.441	0.0925	6.44333	0.105	6.43933	0.09	6.44567	0.1225	6.454	0.13
6.443	0.095	6.449	0.095	6.45133	0.1075	6.44733	0.09	6.45367	0.115	6.46233	0.13
6.451	0.0925	6.457	0.0925	6.45967	0.1075	6.45533	0.0875	6.46167	0.1225	6.47	0.125
6.459	0.0875	6.465	0.0875	6.46767	0.1075	6.46333	0.0875	6.46967	0.1225	6.47833	0.13
6.467	0.0925	6.473	0.095	6.47567	0.105	6.47167	0.0875	6.478	0.12	6.48633	0.125
6.475	0.095	6.481	0.095	6.48367	0.1075	6.47967	0.09	6.486	0.12	6.49467	0.13
6.48333	0.0875	6.48933	0.0925	6.492	0.1075	6.48767	0.0925	6.49433	0.1175	6.50267	0.13
6.491	0.0875	6.49733	0.09	6.5	0.1125	6.49567	0.0875	6.50233	0.1175	6.51067	0.13
6.49933	0.0875	6.50533	0.0925	6.508	0.1125	6.50367	0.09	6.51033	0.1175	6.51867	0.13
6.50733	0.095	6.51333	0.095	6.516	0.105	6.512	0.0925	6.51833	0.1225	6.52667	0.135
6.51533	0.095	6.52167	0.095	6.524	0.11	6.52	0.0875	6.52633	0.12	6.535	0.1325
6.52367	0.0925	6.52933	0.0925	6.53233	0.105	6.528	0.0875	6.53467	0.115	6.543	0.13
6.53133	0.0925	6.53767	0.0925	6.54033	0.1075	6.536	0.0875	6.54233	0.1225	6.551	0.135
6.53933	0.1	6.54567	0.095	6.54833	0.1075	6.544	0.09	6.55067	0.1175	6.559	0.1325
6.54767	0.095	6.55367	0.095	6.55633	0.11	6.552	0.09	6.55867	0.12	6.567	0.13
6.55567	0.09	6.562	0.0975	6.56467	0.1075	6.56033	0.085	6.56667	0.12	6.57533	0.13
6.56367	0.09	6.57	0.09	6.57267	0.11	6.568	0.0875	6.575	0.1175	6.58333	0.13
6.57167	0.095	6.578	0.095	6.58067	0.1075	6.57633	0.09	6.58267	0.1225	6.59133	0.1325
6.57967	0.0925	6.586	0.095	6.58867	0.105	6.58467	0.0925	6.591	0.1225	6.59933	0.13
6.58767	0.095	6.594	0.095	6.59667	0.105	6.59233	0.0875	6.599	0.1225	6.60767	0.135
6.59567	0.09	6.602	0.095	6.60467	0.11	6.60067	0.0925	6.607	0.125	6.61567	0.1325
6.604	0.0925	6.61	0.095	6.61267	0.11	6.60867	0.0925	6.61533	0.1225	6.62367	0.135
6.612	0.0925	6.61833	0.1	6.621	0.1125	6.61667	0.095	6.62333	0.1225	6.63167	0.1325
6.62	0.0875	6.62633	0.095	6.629	0.1125	6.62467	0.0875	6.63133	0.1225	6.63967	0.13
6.628	0.095	6.63433	0.0925	6.637	0.11	6.63267	0.095	6.63933	0.12	6.648	0.1325
6.636	0.0925	6.64233	0.0975	6.64533	0.11	6.64067	0.0925	6.64733	0.1225	6.656	0.1375
6.644	0.095	6.65067	0.0925	6.653	0.11	6.649	0.0925	6.65533	0.1225	6.66433	0.135
6.65233	0.0925	6.65867	0.0975	6.66133	0.1075	6.657	0.0875	6.66367	0.12	6.67233	0.1325
6.66033	0.095	6.66667	0.095	6.66933	0.115	6.665	0.0875	6.67167	0.12	6.68033	0.135
6.66833	0.1	6.675	0.095	6.67733	0.1125	6.673	0.0925	6.67967	0.125	6.68867	0.14
6.67633	0.095	6.68267	0.0975	6.68567	0.1125	6.68133	0.0925	6.68767	0.1225	6.69633	0.1325
6.68433	0.09	6.691	0.1	6.69367	0.105	6.68933	0.0925	6.69567	0.1225	6.70467	0.1375
6.69267	0.095	6.69867	0.095	6.70167	0.11	6.69733	0.095	6.704	0.115	6.71267	0.135
6.70067	0.095	6.707	0.0925	6.70967	0.1125	6.70533	0.0975	6.712	0.1275	6.72067	0.14
6.70867	0.0975	6.715	0.095	6.71767	0.1125	6.71333	0.09	6.72	0.1225	6.72867	0.1375
6.71667	0.095	6.723	0.1025	6.72567	0.1075	6.72133	0.09	6.72833	0.12	6.737	0.1425
6.725	0.095	6.73133	0.0975	6.734	0.11	6.72967	0.095	6.736	0.1225	6.745	0.1375
6.733	0.095	6.73933	0.095	6.742	0.1125	6.73733	0.09	6.74433	0.1225	6.753	0.1325
6.741	0.095	6.74733	0.1	6.75	0.1125	6.74567	0.0875	6.75233	0.1225	6.761	0.135
6.749	0.095	6.75533	0.1	6.758	0.1125	6.75367	0.09	6.76033	0.1225	6.76933	0.13
6.757	0.095	6.76333	0.095	6.766	0.1125	6.76167	0.09	6.76867	0.1225	6.777	0.1325
6.76533	0.095	6.77167	0.095	6.77433	0.1125	6.77	0.095	6.77633	0.1275	6.78533	0.135
6.77333	0.1	6.77967	0.0975	6.782	0.11	6.77767	0.095	6.78467	0.1225	6.79333	0.135
6.78133	0.095	6.78767	0.1	6.79033	0.1125	6.786	0.09	6.79267	0.12	6.80133	0.1325
6.78933	0.095	6.79567	0.1025	6.79833	0.1125	6.794	0.0925	6.80067	0.1275	6.80967	0.13
6.79733	0.095	6.80367	0.095	6.80633	0.115	6.802	0.0925	6.809	0.1275	6.81767	0.135
6.80533	0.1	6.81167	0.1	6.81433	0.1125	6.81	0.095	6.81667	0.1225	6.82567	0.13
6.81367	0.0975	6.82	0.1025	6.82233	0.1125	6.818	0.095	6.825	0.1225	6.834	0.135
6.82133	0.095	6.828	0.0975	6.83067	0.1125	6.826	0.09	6.833	0.1225	6.842	0.1375
6.82967	0.095	6.83633	0.1025	6.83867	0.1125	6.834	0.095	6.841	0.125	6.85	0.1375
6.83767	0.1	6.844	0.1	6.84667	0.11	6.842	0.095	6.84933	0.1225	6.858	0.14
6.84567	0.095	6.852	0.105	6.85467	0.1125	6.85033	0.09	6.857	0.1275	6.86633	0.1375
6.854	0.095	6.86033	0.0975	6.863	0.1125	6.85833	0.09	6.86533	0.1225	6.87433	0.135
6.862	0.0975	6.868	0.105	6.871	0.11	6.86633	0.0975	6.87333	0.1275	6.88233	0.14
6.87	0.1025	6.87633	0.095	6.879	0.1125	6.87433	0.095	6.88133	0.1225	6.89067	0.13
6.878	0.1	6.88433	0.105	6.887	0.1175	6.88233	0.0925	6.88967	0.1275	6.89833	0.14
6.886	0.095	6.89233	0.0975	6.895	0.1125	6.89067	0.095	6.89767	0.1225	6.90667	0.135
6.894	0.095	6.90033	0.0975	6.90333	0.1125	6.89867	0.095	6.90567	0.1225	6.91467	0.1375
6.90233	0.1	6.90867	0.0975	6.91133	0.1075	6.90667	0.1	6.91367	0.125	6.92267	0.1425
6.91033	0.1025	6.91667	0.1025	6.91933	0.1125	6.91467	0.095	6.92167	0.125	6.931	0.14
6.91833	0.095	6.92467	0.0975	6.92733	0.1125	6.92267	0.095	6.93	0.13	6.939	0.1325
6.92633	0.095	6.93267	0.1025	6.93567	0.1125	6.931	0.0925	6.938	0.125	6.947	0.14
6.93433	0.0975	6.941	0.0975	6.94333	0.1125	6.939	0.095	6.94633	0.13	6.955	0.1375
6.94267	0.095	6.949	0.1025	6.95167	0.115	6.947	0.095	6.954	0.13	6.963	0.135
6.95033	0.095	6.957	0.0975	6.95967	0.115	6.95533	0.0925	6.96233	0.125	6.97133	0.1375
6.95867	0.1025	6.965	0.105	6.96767	0.1125	6.963	0.095	6.97033	0.13	6.97933	0.14
6.96667	0.1	6.973	0.1	6.97567	0.1125	6.97133	0.095	6.97833	0.13	6.98733	0.14
6.97467	0.1	6.981	0.1025	6.984	0.1125	6.97933	0.0975	6.98633	0.125	6.99533	0.135
6.983	0.095	6.98933	0.1	6.992	0.1125	6.98733	0.095	6.99467	0.1275	7.00367	0.135
6.99067	0.095	6.99733	0.1025	7	0.1125	6.99533	0.0975	7.00267	0.13	7.01167	0.14
6.999	0.1025	7.00567	0.1	7.008	0.1125	7.00333	0.0975	7.01067	0.13	7.01967	0.1425
7.007	0.0975	7.01333	0.1075	7.01633	0.115	7.01167	0.095	7.019	0.13	7.02767	0.14
7.015	0.1	7.02167	0.105	7.02433	0.12	7.01967	0.0975	7.02667	0.1275	7.036	0.14
7.023	0.1025	7.02967	0.105	7.03233	0.1175	7.02767	0.1	7.035	0.125	7.044	0.145
7.031	0.0975	7.03767	0.105	7.04033	0.1125	7.03567	0.1	7.043	0.13	7.052	0.14
7.039	0.1	7.046	0.105	7.04833	0.1175	7.04367	0.095	7.051	0.13	7.06	0.1375
7.047	0.1	7.05367	0.105	7.05667	0.115	7.05167	0.095	7.05933	0.13	7.068	0.14
7.05533	0.105	7.06167	0.1	7.06467	0.1175	7.06	0.0975	7.06733	0.13	7.07633	0.1425
7.06333	0.1025	7.07	0.105	7.07267	0.1175	7.068	0.1	7.07533	0.13	7.08433	0.1425
7.07133	0.095	7.078	0.1025	7.08067	0.1175	7.076	0.095	7.08333	0.13	7.09233	0.1375
7.07933	0.0975	7.086	0.1	7.08867	0.1175	7.084	0.095	7.09133	0.13	7.10033	0.1425
7.08733	0.1	7.094	0.095	7.09667	0.1175	7.092	0.105	7.09933	0.13	7.10867	0.14
7.09533	0.11	7.10233	0.105	7.105	0.12	7.10033	0.105	7.10733	0.13	7.11667	0.14
7.10367	0.105	7.11033	0.1	7.113	0.1175	7.10833	0.1	7.11533	0.13	7.12467	0.1425
7.11167	0.1025	7.118	0.105	7.121	0.1125	7.11633	0.1	7.12333	0.13	7.13267	0.145
7.11967	0.105	7.12633	0.1075	7.129	0.115	7.12433	0.0975	7.13133	0.1325	7.141	0.14
7.12767	0.0975	7.13467	0.105	7.13733	0.1175	7.13233	0.105	7.13933	0.125	7.149	0.1425
7.136	0.1025	7.14233	0.1025	7.14533	0.12	7.14033	0.095	7.14767	0.1325	7.157	0.14
7.144	0.105	7.15067	0.1025	7.153	0.1175	7.14867	0.1025	7.15567	0.13	7.16533	0.14
7.152	0.1025	7.15867	0.105	7.16133	0.1225	7.15667	0.1	7.16367	0.13	7.173	0.14
7.16	0.1025	7.16667	0.105	7.16933	0.1225	7.16467	0.1	7.17167	0.13	7.18133	0.1375
7.168	0.1	7.175	0.105	7.17733	0.115	7.17267	0.095	7.18	0.13	7.18933	0.14
7.176	0.105	7.183	0.105	7.18567	0.12	7.18067	0.1025	7.188	0.13	7.19733	0.1425
7.184	0.105	7.191	0.1075	7.19367	0.1175	7.189	0.105	7.196	0.13	7.20567	0.14
7.19233	0.105	7.199	0.105	7.20167	0.1175	7.197	0.1025	7.204	0.135	7.21367	0.14
7.2	0.1025	7.207	0.1075	7.20967	0.1225	7.205	0.095	7.212	0.1325	7.22167	0.1425
7.20833	0.1075	7.215	0.1075	7.218	0.1175	7.213	0.105	7.22	0.135	7.22967	0.1425
7.21633	0.1	7.22333	0.1075	7.226	0.1175	7.221	0.105	7.22833	0.1325	7.23767	0.145
7.22433	0.105	7.23133	0.1125	7.234	0.115	7.22933	0.0975	7.23633	0.13	7.246	0.14
7.23267	0.1025	7.23933	0.105	7.242	0.12	7.237	0.1025	7.24433	0.13	7.254	0.1425
7.24033	0.1025	7.24733	0.105	7.25	0.1175	7.245	0.105	7.25233	0.135	7.262	0.1425
7.24833	0.1025	7.25567	0.11	7.258	0.1175	7.25333	0.0975	7.26033	0.135	7.27033	0.145
7.25667	0.105	7.26367	0.11	7.26633	0.12	7.26133	0.1	7.26867	0.1325	7.278	0.1425
7.26467	0.1025	7.27167	0.1075	7.27433	0.1175	7.26967	0.1	7.27667	0.1325	7.28633	0.145
7.273	0.105	7.27967	0.1075	7.28233	0.1225	7.27733	0.1025	7.28467	0.13	7.29433	0.14
7.28067	0.1	7.28767	0.105	7.29033	0.12	7.28567	0.1	7.29267	0.14	7.30233	0.145
7.28867	0.105	7.296	0.1075	7.29833	0.115	7.29367	0.105	7.301	0.1325	7.31067	0.14
7.297	0.105	7.304	0.11	7.30633	0.1275	7.30167	0.1025	7.309	0.1375	7.31867	0.14
7.305	0.105	7.312	0.1075	7.31467	0.1225	7.30967	0.1075	7.317	0.13	7.32667	0.1425
7.313	0.105	7.32	0.1075	7.32267	0.12	7.31767	0.105	7.325	0.135	7.335	0.145
7.321	0.105	7.328	0.1125	7.33067	0.12	7.326	0.1	7.33333	0.135	7.343	0.1425
7.329	0.1025	7.33633	0.1125	7.33867	0.1225	7.334	0.105	7.34133	0.1375	7.351	0.1425
7.33733	0.105	7.34433	0.1075	7.34667	0.1225	7.342	0.11	7.34933	0.135	7.359	0.1425
7.345	0.105	7.35233	0.105	7.355	0.1225	7.35	0.1025	7.35733	0.13	7.367	0.145
7.35333	0.1075	7.36067	0.11	7.363	0.1175	7.358	0.1025	7.36533	0.1325	7.375	0.1425
7.36133	0.1025	7.36833	0.11	7.371	0.1175	7.366	0.105	7.37367	0.14	7.38333	0.1475
7.36933	0.105	7.37667	0.1075	7.379	0.1225	7.374	0.105	7.38167	0.13	7.39133	0.14
7.37733	0.105	7.38467	0.105	7.38733	0.125	7.382	0.105	7.38967	0.14	7.39933	0.1475
7.38533	0.1075	7.39267	0.105	7.39533	0.115	7.39	0.1075	7.39767	0.13	7.40767	0.1475
7.39367	0.105	7.40067	0.105	7.40333	0.12	7.398	0.105	7.40567	0.1325	7.41567	0.1475
7.40167	0.105	7.40867	0.11	7.41133	0.1225	7.406	0.1025	7.41367	0.1325	7.42367	0.145
7.40967	0.105	7.41667	0.105	7.41933	0.12	7.414	0.105	7.422	0.135	7.43167	0.1475
7.41767	0.105	7.425	0.11	7.42733	0.1225	7.42233	0.105	7.43	0.1325	7.43967	0.1425
7.42567	0.105	7.433	0.1075	7.43533	0.1225	7.43033	0.105	7.438	0.1375	7.448	0.1475
7.43367	0.105	7.441	0.1075	7.44367	0.1225	7.43833	0.105	7.44633	0.1375	7.456	0.1475
7.442	0.105	7.449	0.11	7.45167	0.12	7.44633	0.105	7.45433	0.1375	7.464	0.1475
7.45	0.1075	7.457	0.11	7.45967	0.1225	7.45467	0.1025	7.46233	0.1375	7.472	0.145
7.45767	0.105	7.46533	0.1125	7.46767	0.1225	7.46233	0.1	7.47033	0.135	7.48	0.1475
7.466	0.1075	7.47333	0.11	7.476	0.1225	7.47067	0.1025	7.47867	0.135	7.488	0.145
7.474	0.1025	7.48133	0.11	7.484	0.1225	7.47867	0.1075	7.48633	0.135	7.49633	0.15
7.482	0.105	7.48933	0.1125	7.492	0.1225	7.48667	0.1075	7.49467	0.135	7.50433	0.1475
7.49	0.105	7.49733	0.1075	7.5	0.1225	7.49467	0.105	7.50267	0.1375	7.51267	0.145
7.498	0.105	7.50567	0.1125	7.508	0.125	7.50267	0.105	7.51067	0.1375	7.52067	0.145
7.506	0.1075	7.51367	0.1075	7.51633	0.1225	7.51067	0.1075	7.519	0.135	7.52867	0.1475
7.51433	0.11	7.52167	0.1125	7.52433	0.1225	7.519	0.105	7.527	0.1375	7.537	0.1475
7.52233	0.11	7.52967	0.1125	7.53233	0.1225	7.527	0.105	7.535	0.14	7.545	0.15
7.53033	0.11	7.53767	0.1125	7.54033	0.1225	7.535	0.105	7.543	0.14	7.553	0.145
7.53833	0.105	7.546	0.11	7.54833	0.1225	7.543	0.105	7.551	0.135	7.561	0.1475
7.54633	0.11	7.554	0.1125	7.55667	0.1225	7.55133	0.1075	7.55933	0.14	7.569	0.1475
7.55467	0.105	7.562	0.1075	7.56467	0.1275	7.55933	0.105	7.56733	0.14	7.57733	0.1475
7.56267	0.105	7.57	0.11	7.57267	0.1275	7.56733	0.1075	7.57533	0.14	7.58533	0.1475
7.57067	0.1075	7.578	0.11	7.58067	0.125	7.57533	0.105	7.58333	0.14	7.59333	0.1475
7.57867	0.11	7.58633	0.1125	7.58867	0.1225	7.58333	0.1075	7.59133	0.14	7.60133	0.1475
7.58667	0.105	7.59433	0.1125	7.59667	0.1225	7.59133	0.1075	7.599	0.145	7.60933	0.15
7.59467	0.1075	7.60233	0.1075	7.605	0.125	7.59967	0.105	7.60733	0.14	7.61767	0.1475
7.603	0.1025	7.61033	0.1075	7.613	0.1225	7.60767	0.1075	7.61533	0.1375	7.62567	0.1475
7.611	0.1075	7.61833	0.1125	7.621	0.125	7.61567	0.1075	7.62333	0.14	7.63367	0.1525
7.619	0.105	7.62633	0.1075	7.629	0.125	7.62367	0.105	7.63133	0.14	7.64167	0.145
7.627	0.105	7.63467	0.1125	7.637	0.1225	7.63167	0.11	7.63967	0.14	7.65	0.1475
7.635	0.105	7.64267	0.1125	7.64533	0.1225	7.64	0.1075	7.64767	0.14	7.658	0.1525
7.643	0.105	7.65067	0.115	7.65333	0.1225	7.648	0.1125	7.65567	0.14	7.666	0.1475
7.65133	0.105	7.65867	0.11	7.66133	0.125	7.656	0.1075	7.664	0.14	7.674	0.1475
7.65933	0.11	7.66667	0.1125	7.66933	0.1225	7.664	0.1125	7.67167	0.14	7.68233	0.145
7.66733	0.105	7.675	0.11	7.67733	0.1225	7.672	0.1075	7.68	0.14	7.69033	0.1475
7.67533	0.11	7.68267	0.11	7.68567	0.1225	7.68	0.1125	7.688	0.1425	7.69833	0.15
7.68367	0.1075	7.691	0.1125	7.69367	0.1225	7.68833	0.11	7.696	0.1375	7.70633	0.1475
7.69167	0.11	7.699	0.1125	7.70167	0.1275	7.69633	0.1125	7.704	0.14	7.71433	0.1475
7.69967	0.1075	7.707	0.1125	7.70967	0.1225	7.70433	0.105	7.712	0.145	7.72233	0.15
7.70767	0.1125	7.71533	0.1125	7.71767	0.1225	7.71233	0.11	7.72	0.14	7.73067	0.155
7.71567	0.1075	7.723	0.11	7.726	0.125	7.72033	0.11	7.72833	0.14	7.73867	0.15
7.72367	0.11	7.73133	0.1175	7.734	0.1275	7.72867	0.1125	7.73633	0.14	7.74667	0.1525
7.732	0.1125	7.73933	0.1075	7.742	0.125	7.73633	0.1125	7.74433	0.1425	7.755	0.15
7.73967	0.11	7.74733	0.115	7.75	0.1275	7.74467	0.1125	7.75233	0.1425	7.763	0.1525
7.748	0.1075	7.75533	0.11	7.758	0.125	7.75267	0.11	7.76067	0.14	7.771	0.15
7.756	0.105	7.76333	0.1125	7.76633	0.13	7.76067	0.1125	7.76867	0.145	7.779	0.1475
7.764	0.11	7.771	0.1125	7.77433	0.13	7.769	0.1075	7.77667	0.1425	7.78733	0.15
7.772	0.1125	7.77933	0.1125	7.78233	0.13	7.77667	0.115	7.78467	0.145	7.79533	0.1475
7.78	0.11	7.78733	0.1125	7.79033	0.125	7.785	0.11	7.793	0.1475	7.80333	0.1525
7.78833	0.11	7.79533	0.1125	7.79833	0.13	7.793	0.1075	7.80067	0.1425	7.81133	0.1475
7.79633	0.11	7.80333	0.1125	7.80667	0.125	7.801	0.1075	7.809	0.145	7.81933	0.155
7.80433	0.1125	7.81167	0.115	7.81467	0.13	7.809	0.1125	7.817	0.145	7.82767	0.1475
7.81233	0.1075	7.81967	0.1125	7.82267	0.13	7.817	0.11	7.825	0.1475	7.83567	0.15
7.82067	0.1125	7.82767	0.1125	7.83067	0.1275	7.82533	0.1125	7.833	0.14	7.84367	0.155
7.82833	0.105	7.836	0.11	7.83867	0.1225	7.83333	0.1125	7.841	0.1425	7.85167	0.1475
7.83667	0.1125	7.844	0.1125	7.84667	0.125	7.84133	0.1125	7.849	0.1475	7.85967	0.15
7.84433	0.11	7.852	0.115	7.855	0.125	7.84933	0.11	7.857	0.1475	7.868	0.155
7.85267	0.1125	7.86	0.1125	7.86267	0.1275	7.85733	0.105	7.86533	0.1425	7.876	0.15
7.86067	0.1075	7.868	0.1125	7.871	0.1225	7.86533	0.115	7.87333	0.1475	7.88433	0.1525
7.86867	0.1125	7.876	0.1125	7.879	0.1275	7.87367	0.11	7.88133	0.1475	7.89233	0.1525
7.87667	0.1125	7.88433	0.1125	7.887	0.13	7.88167	0.11	7.88933	0.1425	7.90033	0.155
7.88467	0.11	7.89233	0.1125	7.89533	0.13	7.88967	0.1075	7.89733	0.14	7.90833	0.1475
7.89267	0.1075	7.90033	0.1075	7.90333	0.13	7.89767	0.115	7.90567	0.1425	7.91633	0.1525
7.901	0.1125	7.90833	0.1125	7.91133	0.125	7.90567	0.1125	7.91333	0.145	7.92467	0.1575
7.909	0.115	7.91667	0.1125	7.91933	0.13	7.914	0.11	7.92167	0.145	7.93267	0.15
7.917	0.1125	7.92467	0.1125	7.92733	0.125	7.92167	0.115	7.92967	0.14	7.94067	0.15
7.925	0.115	7.93267	0.1125	7.93567	0.1275	7.93	0.105	7.938	0.1475	7.94867	0.1475
7.933	0.115	7.94067	0.1175	7.94333	0.125	7.938	0.1125	7.94567	0.1475	7.957	0.1525
7.94133	0.1125	7.94867	0.11	7.95167	0.13	7.946	0.1125	7.954	0.1475	7.965	0.1525
7.94933	0.115	7.95667	0.115	7.95967	0.13	7.954	0.115	7.962	0.1425	7.973	0.155
7.95733	0.115	7.965	0.11	7.96767	0.13	7.962	0.115	7.97	0.1475	7.98133	0.155
7.96533	0.1125	7.973	0.1175	7.976	0.13	7.97033	0.1125	7.97833	0.145	7.98933	0.155
7.97333	0.1125	7.981	0.1125	7.98367	0.1275	7.97833	0.1125	7.986	0.145	7.99733	0.1525
7.98133	0.1125	7.989	0.115	7.992	0.1325	7.98633	0.11	7.99433	0.1425	8.00533	0.1525
7.98933	0.11	7.997	0.1125	8	0.1275	7.99433	0.1125	8.00233	0.14	8.01333	0.1525
7.99767	0.1175	8.00533	0.115	8.008	0.13	8.00233	0.1125	8.01033	0.1475	8.02167	0.1475
8.00567	0.1175	8.01333	0.115	8.01633	0.1275	8.01067	0.115	8.01867	0.1475	8.02933	0.15
8.01367	0.1175	8.02133	0.115	8.02433	0.135	8.01867	0.115	8.02667	0.145	8.03767	0.1475
8.02167	0.1125	8.02933	0.11	8.03233	0.135	8.02667	0.1125	8.03467	0.1425	8.04567	0.1575
8.02967	0.12	8.03733	0.1125	8.04033	0.1325	8.03467	0.1125	8.04267	0.1475	8.054	0.155
8.038	0.1125	8.04567	0.1125	8.04833	0.13	8.04267	0.1125	8.05067	0.1475	8.062	0.1525
8.04567	0.1125	8.05333	0.115	8.05667	0.1375	8.05067	0.1125	8.059	0.1425	8.07	0.155
8.054	0.1125	8.06167	0.1125	8.06467	0.13	8.059	0.11	8.067	0.1475	8.078	0.1525
8.062	0.115	8.06967	0.1175	8.07267	0.13	8.067	0.1125	8.075	0.1475	8.08633	0.1525
8.07033	0.1125	8.07767	0.115	8.08067	0.1325	8.075	0.1125	8.083	0.145	8.09433	0.155
8.07833	0.1125	8.086	0.115	8.08867	0.1325	8.083	0.1125	8.091	0.14	8.10233	0.155
8.08633	0.1175	8.094	0.1125	8.09667	0.13	8.091	0.1125	8.09933	0.145	8.11033	0.1575
8.09433	0.115	8.102	0.12	8.105	0.13	8.09933	0.115	8.10733	0.1475	8.11833	0.155
8.10233	0.1125	8.11	0.115	8.113	0.13	8.10733	0.1175	8.11533	0.1475	8.12667	0.1575
8.11067	0.1125	8.118	0.1175	8.121	0.13	8.11533	0.1125	8.12333	0.145	8.13467	0.155
8.11833	0.12	8.12633	0.115	8.129	0.1325	8.12333	0.1125	8.13133	0.1475	8.14267	0.1525
8.12667	0.1175	8.13433	0.115	8.137	0.135	8.13133	0.11	8.13967	0.15	8.15067	0.155
8.13467	0.1175	8.14233	0.1175	8.14533	0.1325	8.13933	0.1125	8.14767	0.145	8.15867	0.155
8.14267	0.1125	8.15033	0.115	8.15333	0.13	8.14767	0.1125	8.15567	0.1475	8.167	0.1575
8.151	0.115	8.15833	0.1175	8.16133	0.13	8.15567	0.115	8.16367	0.1475	8.175	0.1575
8.15867	0.1125	8.16667	0.1125	8.16933	0.1375	8.16367	0.1125	8.17167	0.1475	8.183	0.1575
8.167	0.115	8.17467	0.115	8.17733	0.135	8.17167	0.1125	8.18	0.1475	8.19133	0.1575
8.175	0.1125	8.18267	0.1175	8.18567	0.135	8.17967	0.1175	8.188	0.1475	8.19933	0.155
8.183	0.12	8.19067	0.1125	8.19367	0.13	8.188	0.1125	8.196	0.1525	8.20733	0.1575
8.19133	0.115	8.19867	0.12	8.20167	0.1375	8.196	0.1125	8.20433	0.1475	8.21533	0.1575
8.199	0.1175	8.207	0.115	8.20967	0.1325	8.204	0.1125	8.212	0.1475	8.22333	0.155
8.207	0.1125	8.215	0.12	8.21767	0.1325	8.212	0.1125	8.22033	0.1475	8.23133	0.1575
8.215	0.12	8.223	0.1125	8.22567	0.1375	8.22	0.12	8.22833	0.1525	8.23967	0.16
8.223	0.1225	8.231	0.1175	8.234	0.14	8.22833	0.115	8.23633	0.1475	8.24767	0.16
8.23133	0.12	8.239	0.1175	8.242	0.135	8.236	0.1125	8.24433	0.15	8.25567	0.1575
8.23933	0.1125	8.247	0.115	8.25	0.1325	8.244	0.1175	8.25233	0.15	8.264	0.1575
8.24733	0.1175	8.25533	0.1125	8.258	0.13	8.25233	0.12	8.26067	0.1575	8.272	0.1625
8.25533	0.1225	8.26333	0.12	8.266	0.1325	8.26033	0.12	8.26867	0.15	8.28	0.1575
8.26333	0.1125	8.27133	0.12	8.27433	0.1325	8.26833	0.115	8.27667	0.1525	8.288	0.1575
8.27167	0.115	8.27933	0.12	8.28233	0.135	8.27633	0.115	8.28467	0.1475	8.296	0.1575
8.27967	0.1175	8.28733	0.115	8.29033	0.135	8.28467	0.1175	8.29267	0.15	8.304	0.1575
8.28767	0.1175	8.29567	0.115	8.29833	0.135	8.29267	0.1175	8.301	0.1475	8.31233	0.1575
8.29567	0.1125	8.30367	0.12	8.30667	0.1325	8.30067	0.12	8.309	0.15	8.32033	0.1575
8.30367	0.1175	8.31167	0.1175	8.31467	0.135	8.30867	0.1125	8.317	0.1475	8.32867	0.1575
8.31167	0.1175	8.31967	0.115	8.32267	0.13	8.31667	0.1175	8.325	0.15	8.33667	0.165
8.31967	0.1225	8.32767	0.1125	8.33067	0.13	8.325	0.1175	8.33333	0.155	8.34467	0.1575
8.328	0.1225	8.336	0.12	8.33867	0.135	8.333	0.115	8.34133	0.155	8.35267	0.16
8.336	0.12	8.344	0.1175	8.34667	0.1325	8.34067	0.1125	8.34933	0.1525	8.36067	0.155
8.344	0.1125	8.352	0.1125	8.355	0.135	8.349	0.1175	8.35733	0.1575	8.369	0.16
8.352	0.1175	8.36	0.115	8.363	0.1325	8.357	0.12	8.36533	0.15	8.377	0.16
8.36	0.1175	8.368	0.115	8.371	0.1375	8.365	0.12	8.37367	0.1525	8.385	0.1625
8.36833	0.1175	8.37633	0.1125	8.379	0.1375	8.373	0.115	8.38133	0.1525	8.393	0.1575
8.37633	0.1175	8.38433	0.115	8.387	0.135	8.381	0.1175	8.38967	0.15	8.401	0.1575
8.38433	0.1225	8.39233	0.1175	8.39533	0.1325	8.38933	0.1175	8.39767	0.155	8.40933	0.1575
8.39233	0.1225	8.40033	0.1175	8.40333	0.13	8.39733	0.115	8.40567	0.155	8.41733	0.1575
8.40033	0.12	8.40833	0.1125	8.41133	0.135	8.40533	0.1125	8.41367	0.1475	8.42533	0.155
8.40833	0.1175	8.41667	0.1175	8.41933	0.135	8.41333	0.115	8.42167	0.155	8.43333	0.16
8.41633	0.1125	8.42467	0.115	8.42733	0.135	8.42133	0.12	8.43	0.1525	8.44167	0.1575
8.42433	0.1175	8.43267	0.12	8.43567	0.1325	8.42967	0.1225	8.438	0.15	8.44967	0.1625
8.43267	0.1125	8.44067	0.12	8.44367	0.1325	8.43767	0.1175	8.44633	0.155	8.45767	0.16
8.44067	0.1175	8.44867	0.12	8.45167	0.135	8.44533	0.1175	8.45433	0.155	8.46567	0.16
8.44867	0.12	8.45667	0.1175	8.46	0.13	8.45367	0.1175	8.46233	0.1575	8.47367	0.1625
8.45667	0.12	8.465	0.1225	8.46767	0.135	8.46167	0.1175	8.47033	0.15	8.482	0.16
8.46467	0.1175	8.473	0.1175	8.476	0.135	8.46967	0.1125	8.47833	0.1525	8.49	0.155
8.47267	0.1225	8.481	0.115	8.484	0.13	8.478	0.1175	8.48633	0.155	8.49833	0.1625
8.481	0.115	8.489	0.115	8.492	0.1325	8.48567	0.1175	8.49433	0.1525	8.506	0.16
8.489	0.1225	8.49733	0.12	8.5	0.135	8.494	0.12	8.50233	0.1575	8.51433	0.16
8.497	0.1175	8.50533	0.1225	8.508	0.1375	8.502	0.1175	8.51067	0.15	8.52233	0.1575
8.505	0.1225	8.51333	0.12	8.51633	0.135	8.51	0.1225	8.519	0.1575	8.53033	0.1625
8.513	0.1225	8.52133	0.1225	8.52433	0.1325	8.518	0.1175	8.52667	0.155	8.53867	0.1575
8.52133	0.12	8.52933	0.1225	8.53233	0.14	8.526	0.1225	8.53467	0.155	8.54667	0.16
8.529	0.12	8.53733	0.12	8.54033	0.1375	8.53433	0.1175	8.543	0.155	8.55467	0.1575
8.53733	0.1225	8.54567	0.12	8.54833	0.135	8.54233	0.12	8.551	0.1575	8.56267	0.1625
8.54533	0.12	8.55367	0.1175	8.55633	0.1375	8.55033	0.1175	8.559	0.155	8.57067	0.16
8.55333	0.12	8.56167	0.12	8.56467	0.14	8.55833	0.12	8.567	0.155	8.579	0.16
8.56167	0.12	8.56967	0.1175	8.57267	0.1325	8.56633	0.115	8.575	0.1525	8.587	0.1575
8.56967	0.1225	8.57767	0.1175	8.58067	0.13	8.57433	0.12	8.58333	0.1575	8.595	0.1625
8.57767	0.12	8.58567	0.1175	8.58867	0.13	8.58233	0.12	8.59133	0.1575	8.603	0.16
8.58567	0.1225	8.594	0.12	8.59667	0.1375	8.59033	0.1225	8.59933	0.1575	8.611	0.165
8.59367	0.1175	8.602	0.12	8.605	0.135	8.59867	0.1175	8.60733	0.1575	8.61933	0.1575
8.60167	0.1125	8.61	0.115	8.613	0.135	8.60667	0.1225	8.61533	0.1575	8.62733	0.16
8.60967	0.1225	8.618	0.1225	8.621	0.1325	8.61467	0.115	8.62367	0.155	8.63533	0.1625
8.61767	0.1225	8.626	0.1175	8.629	0.1375	8.623	0.1225	8.63167	0.155	8.64367	0.1575
8.626	0.1175	8.63433	0.12	8.63733	0.14	8.63067	0.12	8.63967	0.1575	8.65167	0.1575
8.634	0.12	8.64233	0.1225	8.64533	0.1375	8.639	0.12	8.64767	0.1575	8.65967	0.165
8.642	0.12	8.65033	0.125	8.65333	0.1325	8.647	0.1225	8.65567	0.1575	8.668	0.1625
8.65033	0.1225	8.65833	0.1225	8.66133	0.1325	8.655	0.1225	8.664	0.1575	8.67567	0.1625
8.658	0.12	8.66633	0.1225	8.66933	0.14	8.663	0.12	8.672	0.1575	8.684	0.1575
8.66633	0.1175	8.67467	0.1225	8.67733	0.135	8.671	0.115	8.68	0.1575	8.692	0.1625
8.674	0.125	8.68267	0.1225	8.68567	0.14	8.67933	0.1175	8.688	0.16	8.7	0.1625
8.68233	0.1225	8.69067	0.1225	8.69367	0.1325	8.68733	0.1225	8.696	0.155	8.70833	0.165
8.69033	0.1225	8.69867	0.1225	8.70167	0.1425	8.69533	0.1225	8.70433	0.1575	8.71633	0.1625
8.69833	0.115	8.70667	0.1225	8.70967	0.14	8.70333	0.1225	8.71233	0.1575	8.72433	0.165
8.70633	0.12	8.715	0.125	8.71767	0.14	8.71167	0.1225	8.72033	0.16	8.73233	0.16
8.71467	0.12	8.723	0.1225	8.72567	0.1375	8.71933	0.13	8.72833	0.16	8.74067	0.165
8.72267	0.1225	8.731	0.1225	8.734	0.14	8.72767	0.1225	8.73667	0.1575	8.74867	0.1625
8.73067	0.1225	8.739	0.1225	8.742	0.14	8.73567	0.12	8.74467	0.1575	8.75667	0.1625
8.73867	0.1225	8.747	0.1225	8.75	0.1425	8.74367	0.125	8.75267	0.16	8.76467	0.1575
8.74667	0.1225	8.75533	0.12	8.758	0.14	8.75167	0.1225	8.76067	0.16	8.773	0.165
8.75467	0.12	8.76333	0.125	8.766	0.135	8.75967	0.1175	8.769	0.1575	8.781	0.165
8.76267	0.1275	8.77133	0.12	8.77433	0.1375	8.768	0.1225	8.77667	0.1575	8.789	0.1625
8.771	0.125	8.77933	0.1225	8.782	0.135	8.776	0.1225	8.785	0.1575	8.797	0.16
8.779	0.1225	8.78733	0.1225	8.79033	0.1375	8.784	0.1225	8.793	0.16	8.80533	0.1625
8.787	0.1225	8.79533	0.1225	8.79833	0.14	8.792	0.1225	8.801	0.1575	8.81333	0.1575
8.795	0.12	8.80333	0.1225	8.80633	0.14	8.8	0.125	8.809	0.1575	8.82133	0.1675
8.803	0.1225	8.81133	0.1225	8.81467	0.14	8.80833	0.1225	8.817	0.1625	8.82933	0.1575
8.81133	0.1225	8.81967	0.1225	8.82233	0.1425	8.81633	0.125	8.82533	0.1625	8.83733	0.1575
8.81933	0.1225	8.82767	0.1225	8.83067	0.14	8.82433	0.1225	8.83333	0.1625	8.84567	0.16
8.82733	0.1225	8.836	0.12	8.83867	0.14	8.83233	0.1275	8.84133	0.1575	8.85367	0.1625
8.83533	0.1225	8.84367	0.1225	8.84667	0.1425	8.84033	0.1275	8.84933	0.165	8.86167	0.165
8.84333	0.1225	8.852	0.1225	8.85467	0.14	8.84833	0.1225	8.85733	0.165	8.87	0.165
8.85133	0.1225	8.86	0.1225	8.86267	0.14	8.85667	0.125	8.86533	0.165	8.878	0.16
8.85967	0.125	8.868	0.125	8.871	0.1475	8.86467	0.1275	8.87367	0.165	8.886	0.165
8.86767	0.1275	8.876	0.1225	8.879	0.1375	8.87267	0.1275	8.88167	0.16	8.894	0.16
8.87567	0.12	8.88433	0.1225	8.887	0.1425	8.88067	0.125	8.89	0.1575	8.902	0.165
8.88367	0.1225	8.89233	0.125	8.89533	0.145	8.88867	0.125	8.898	0.1575	8.91033	0.1575
8.89167	0.1225	8.90033	0.1225	8.903	0.145	8.897	0.1225	8.906	0.16	8.91833	0.165
8.89967	0.125	8.90833	0.1225	8.91133	0.1425	8.905	0.1275	8.914	0.16	8.92633	0.16
8.908	0.125	8.91633	0.1275	8.91933	0.14	8.913	0.125	8.922	0.1625	8.93433	0.165
8.916	0.1275	8.92467	0.125	8.92733	0.1425	8.921	0.13	8.93	0.1625	8.94267	0.1625
8.924	0.1225	8.93267	0.1225	8.93533	0.14	8.929	0.1225	8.93833	0.1625	8.95033	0.165
8.932	0.1225	8.94067	0.1275	8.94333	0.14	8.93733	0.13	8.94633	0.16	8.95867	0.1625
8.94	0.1225	8.94867	0.125	8.95133	0.145	8.94533	0.1275	8.95433	0.16	8.96667	0.16
8.948	0.125	8.95667	0.1225	8.95967	0.1475	8.95333	0.125	8.96233	0.16	8.97467	0.165
8.956	0.13	8.965	0.1225	8.96767	0.14	8.96133	0.13	8.97033	0.1625	8.983	0.165
8.96433	0.1275	8.973	0.125	8.97567	0.145	8.96933	0.13	8.97867	0.1575	8.991	0.165
8.97233	0.1275	8.981	0.1275	8.98367	0.14	8.97767	0.13	8.98633	0.1625	8.99933	0.165
8.98033	0.1275	8.989	0.1275	8.99167	0.145	8.98533	0.125	8.99467	0.165	9.00733	0.1625
8.98833	0.125	8.997	0.1225	9	0.145	8.99367	0.1275	9.00267	0.165	9.01533	0.165
8.99633	0.125	9.00533	0.125	9.008	0.1425	9.00167	0.1325	9.011	0.16	9.02333	0.165
9.00433	0.1275	9.01333	0.1225	9.016	0.1475	9.00967	0.13	9.019	0.1625	9.03133	0.165
9.01233	0.1225	9.02133	0.13	9.024	0.14	9.01767	0.1275	9.027	0.1625	9.03967	0.16
9.02067	0.125	9.02933	0.125	9.032	0.145	9.026	0.1275	9.035	0.165	9.04767	0.165
9.02867	0.125	9.03733	0.125	9.04033	0.14	9.034	0.13	9.043	0.16	9.05567	0.165
9.03667	0.13	9.04567	0.1275	9.04833	0.145	9.042	0.1275	9.051	0.165	9.06367	0.17
9.04467	0.1275	9.05333	0.1225	9.05633	0.1475	9.05	0.1275	9.05933	0.165	9.072	0.1675
9.05267	0.1275	9.06167	0.1225	9.06433	0.145	9.05833	0.13	9.067	0.165	9.08	0.1675
9.061	0.1275	9.06967	0.125	9.07267	0.1425	9.06633	0.13	9.07533	0.1625	9.088	0.165
9.069	0.1275	9.07767	0.1225	9.08033	0.145	9.074	0.125	9.08333	0.165	9.096	0.165
9.077	0.125	9.08567	0.1275	9.08867	0.1475	9.08233	0.1275	9.09133	0.1625	9.10433	0.165
9.085	0.1275	9.094	0.125	9.09667	0.145	9.09033	0.1275	9.09967	0.17	9.11233	0.1675
9.093	0.1275	9.102	0.1275	9.10467	0.1475	9.09833	0.1325	9.10767	0.165	9.12033	0.16
9.101	0.13	9.11	0.13	9.11267	0.14	9.10667	0.1325	9.11567	0.165	9.12867	0.165
9.10933	0.1275	9.118	0.125	9.12067	0.145	9.11467	0.13	9.12367	0.165	9.13633	0.1675
9.117	0.1275	9.126	0.1225	9.129	0.145	9.12267	0.13	9.13167	0.165	9.14467	0.165
9.12533	0.1275	9.13433	0.1275	9.137	0.145	9.13067	0.1275	9.14	0.165	9.15267	0.165
9.13333	0.125	9.142	0.1275	9.14533	0.1475	9.13867	0.13	9.148	0.1625	9.16067	0.1625
9.14133	0.125	9.15033	0.13	9.153	0.1475	9.147	0.13	9.156	0.165	9.169	0.165
9.14933	0.1275	9.15833	0.13	9.16133	0.1475	9.155	0.1325	9.164	0.165	9.177	0.1625
9.15733	0.13	9.16633	0.13	9.16933	0.1475	9.163	0.13	9.172	0.1625	9.185	0.16
9.16567	0.125	9.17467	0.1275	9.17733	0.15	9.171	0.13	9.18033	0.165	9.193	0.165
9.17367	0.1275	9.18267	0.13	9.18567	0.1475	9.179	0.13	9.18833	0.165	9.20133	0.165
9.18167	0.13	9.19067	0.1275	9.19333	0.1475	9.18733	0.13	9.19633	0.165	9.20933	0.1675
9.18967	0.125	9.19867	0.13	9.20167	0.1475	9.195	0.13	9.20433	0.1675	9.21733	0.165
9.19767	0.1275	9.20667	0.1325	9.20967	0.1475	9.203	0.13	9.21233	0.1675	9.22533	0.16
9.20567	0.1275	9.215	0.13	9.21767	0.145	9.21133	0.13	9.22067	0.17	9.23333	0.165
9.21367	0.13	9.223	0.1275	9.22567	0.1475	9.21933	0.13	9.22867	0.165	9.24167	0.1675
9.22167	0.1275	9.231	0.1275	9.23367	0.1475	9.22733	0.135	9.23667	0.165	9.24967	0.165
9.23	0.1225	9.239	0.13	9.242	0.1525	9.23533	0.13	9.24467	0.16	9.258	0.17
9.238	0.13	9.247	0.1325	9.25	0.145	9.24333	0.13	9.25267	0.1625	9.26567	0.16
9.246	0.1275	9.255	0.125	9.258	0.1475	9.25167	0.13	9.261	0.17	9.274	0.165
9.254	0.13	9.26333	0.13	9.266	0.145	9.25967	0.13	9.269	0.165	9.282	0.16
9.262	0.125	9.27133	0.1325	9.274	0.15	9.26767	0.13	9.277	0.1675	9.29	0.1625
9.27033	0.13	9.27933	0.13	9.282	0.1475	9.27567	0.13	9.28533	0.165	9.298	0.1625
9.27833	0.1275	9.28733	0.13	9.29033	0.1525	9.28367	0.13	9.293	0.1675	9.306	0.1675
9.28633	0.1275	9.29533	0.13	9.298	0.1475	9.292	0.1375	9.30133	0.1675	9.31433	0.16
9.29433	0.1325	9.30333	0.135	9.30633	0.1475	9.29967	0.1325	9.30933	0.17	9.32233	0.165
9.30233	0.125	9.31133	0.13	9.31467	0.145	9.308	0.1325	9.31733	0.165	9.33067	0.165
9.31067	0.13	9.31967	0.13	9.32233	0.1475	9.316	0.1325	9.32533	0.1675	9.33867	0.165
9.31867	0.13	9.32767	0.13	9.33067	0.1475	9.324	0.13	9.33333	0.165	9.34667	0.165
9.32667	0.13	9.33567	0.13	9.33867	0.1475	9.332	0.1325	9.34167	0.165	9.355	0.165
9.33467	0.13	9.34367	0.13	9.34667	0.1525	9.34033	0.135	9.34967	0.165	9.36267	0.165
9.34267	0.1275	9.352	0.1275	9.35467	0.1475	9.34833	0.135	9.35767	0.1675	9.371	0.165
9.35067	0.1325	9.36	0.13	9.36267	0.145	9.35633	0.1325	9.366	0.165	9.379	0.16
9.359	0.1325	9.368	0.13	9.371	0.15	9.36467	0.13	9.374	0.17	9.387	0.1675
9.367	0.13	9.376	0.1325	9.379	0.1525	9.37233	0.135	9.382	0.1675	9.395	0.16
9.375	0.13	9.38433	0.13	9.387	0.15	9.38033	0.13	9.39	0.175	9.40333	0.165
9.383	0.13	9.39233	0.13	9.395	0.1475	9.38867	0.1375	9.398	0.17	9.41133	0.165
9.391	0.13	9.40033	0.1325	9.40333	0.1525	9.39667	0.1325	9.406	0.1675	9.41933	0.165
9.399	0.13	9.40833	0.135	9.411	0.15	9.40467	0.1325	9.41433	0.17	9.42733	0.165
9.40733	0.1275	9.41667	0.13	9.41933	0.1525	9.41267	0.13	9.42233	0.17	9.43567	0.1675
9.415	0.1325	9.42433	0.1325	9.42733	0.1525	9.421	0.13	9.43033	0.1675	9.44367	0.165
9.42333	0.13	9.43267	0.13	9.43533	0.1475	9.429	0.1325	9.43833	0.17	9.45167	0.16
9.43133	0.1375	9.44067	0.13	9.44333	0.155	9.437	0.13	9.44633	0.17	9.46	0.1675
9.43933	0.1275	9.44867	0.1325	9.45133	0.155	9.445	0.14	9.45433	0.1675	9.468	0.165
9.44733	0.13	9.45667	0.135	9.45967	0.15	9.453	0.1325	9.462	0.1675	9.476	0.165
9.45533	0.1325	9.465	0.13	9.46767	0.15	9.461	0.135	9.47033	0.17	9.484	0.165
9.46367	0.13	9.47267	0.135	9.47567	0.1475	9.46933	0.1325	9.47833	0.17	9.49233	0.1575
9.47167	0.13	9.481	0.1325	9.48367	0.15	9.47733	0.1375	9.48633	0.1675	9.50033	0.165
9.47967	0.1325	9.489	0.13	9.49167	0.1525	9.48533	0.135	9.49467	0.1675	9.50833	0.165
9.48767	0.1325	9.497	0.1325	9.5	0.15	9.49333	0.1325	9.50267	0.17	9.51633	0.165
9.49567	0.13	9.50533	0.135	9.508	0.155	9.50133	0.13	9.51067	0.17	9.52433	0.16
9.50367	0.125	9.51333	0.13	9.516	0.1475	9.50933	0.13	9.519	0.175	9.53233	0.165
9.51167	0.1325	9.52133	0.135	9.524	0.155	9.51767	0.1325	9.527	0.17	9.54067	0.16
9.52	0.13	9.52933	0.135	9.532	0.1475	9.52567	0.1325	9.535	0.1675	9.54867	0.165
9.528	0.1325	9.53733	0.1325	9.54	0.1475	9.53367	0.13	9.54267	0.1725	9.55667	0.16
9.536	0.13	9.54567	0.135	9.548	0.15	9.54167	0.13	9.551	0.17	9.56467	0.165
9.544	0.1325	9.55367	0.1375	9.55633	0.1525	9.54967	0.1375	9.559	0.1725	9.573	0.16
9.552	0.13	9.56167	0.135	9.56433	0.15	9.558	0.13	9.567	0.175	9.581	0.165
9.56033	0.135	9.56967	0.1325	9.57233	0.1475	9.566	0.1375	9.57533	0.1675	9.589	0.1625
9.56833	0.1325	9.57767	0.135	9.58067	0.1525	9.574	0.13	9.58333	0.1725	9.59733	0.165
9.57633	0.13	9.586	0.1375	9.58833	0.1525	9.582	0.1375	9.59133	0.175	9.60533	0.16
9.58433	0.135	9.594	0.1375	9.59667	0.1475	9.59	0.1325	9.59933	0.1725	9.61333	0.1575
9.59233	0.135	9.602	0.1325	9.60467	0.1475	9.59833	0.1325	9.60733	0.17	9.62133	0.155
9.60033	0.1325	9.61	0.13	9.61267	0.15	9.60633	0.1375	9.61533	0.1725	9.62933	0.1575
9.60867	0.1325	9.618	0.135	9.621	0.15	9.61433	0.1325	9.62367	0.1675	9.63767	0.15
9.61667	0.135	9.62633	0.13	9.629	0.155	9.62233	0.135	9.63167	0.17	9.64567	0.1325
9.62467	0.135	9.63433	0.1325	9.637	0.1525	9.63033	0.1325	9.63967	0.1675	9.65367	0.0075
9.63267	0.135	9.642	0.1325	9.645	0.155	9.63833	0.13	9.64767	0.1725	9.66167	0.0075
9.64067	0.14	9.65033	0.14	9.653	0.1525	9.64667	0.135	9.65567	0.17	9.67	0.0075
9.649	0.1325	9.65833	0.14	9.661	0.1475	9.65467	0.1375	9.664	0.175	9.678	0.005
9.65667	0.1375	9.66667	0.135	9.66933	0.155	9.66267	0.135	9.672	0.17	9.686	0
9.665	0.1325	9.67467	0.1325	9.67733	0.15	9.67067	0.1375	9.68	0.1775	9.694	0.0025
9.673	0.1375	9.68267	0.14	9.68567	0.15	9.67867	0.135	9.688	0.17	9.702	0.0025
9.681	0.1325	9.691	0.1375	9.69333	0.1525	9.687	0.14	9.696	0.175	9.71033	0.0075
9.68933	0.135	9.69867	0.1375	9.70133	0.15	9.695	0.1375	9.70433	0.1675	9.71833	0.005
9.69733	0.1375	9.70667	0.135	9.70933	0.1525	9.70267	0.1325	9.71233	0.175	9.72633	0
9.70533	0.135	9.71467	0.1375	9.71733	0.15	9.711	0.14	9.72033	0.1725	9.73433	0.005
9.71333	0.135	9.723	0.1325	9.72533	0.15	9.719	0.1325	9.72833	0.175	9.74267	0
9.72133	0.1375	9.731	0.14	9.73333	0.1575	9.727	0.1375	9.73667	0.175	9.75067	0
9.72933	0.135	9.739	0.13	9.74133	0.1475	9.735	0.1375	9.74467	0.1725	9.75867	0.005
9.73767	0.1325	9.747	0.1375	9.74967	0.15	9.743	0.135	9.75233	0.1725	9.76667	0.005
9.74567	0.135	9.75533	0.1375	9.75767	0.1525	9.75133	0.13	9.76067	0.175	9.775	0.0025
9.75367	0.135	9.76333	0.135	9.76567	0.15	9.75933	0.1375	9.76867	0.17	9.783	0.005
9.76167	0.1375	9.77133	0.14	9.774	0.1525	9.76767	0.135	9.77667	0.175	9.791	0
9.76967	0.1375	9.77933	0.135	9.78167	0.15	9.77533	0.14	9.785	0.175	9.799	0.0025
9.778	0.135	9.78733	0.14	9.79	0.155	9.78333	0.1375	9.793	0.175	9.80733	0
9.78567	0.1375	9.79533	0.135	9.79767	0.15	9.79167	0.14	9.801	0.175	9.81533	0.0025
9.794	0.135	9.80333	0.135	9.806	0.1525	9.79967	0.1325	9.809	0.1725	9.82333	0.005
9.802	0.135	9.81167	0.14	9.814	0.1525	9.80767	0.14	9.817	0.1725	9.83133	0
9.81	0.13	9.81967	0.1375	9.822	0.1575	9.81567	0.135	9.825	0.175	9.83933	0.005
9.81833	0.1375	9.82767	0.1375	9.83033	0.1575	9.824	0.1375	9.83333	0.17	9.84733	0.005
9.826	0.1375	9.836	0.135	9.83833	0.15	9.832	0.1375	9.84133	0.1775	9.85567	0.0025
9.83433	0.1375	9.844	0.14	9.84633	0.155	9.84	0.1375	9.84967	0.175	9.86367	0.005
9.842	0.1325	9.852	0.14	9.85433	0.1525	9.848	0.14	9.85733	0.175	9.872	0.005
9.85033	0.14	9.86	0.14	9.86267	0.1575	9.85633	0.1325	9.86567	0.17	9.88	0.0025
9.85833	0.135	9.868	0.135	9.87067	0.15	9.864	0.135	9.87367	0.175	9.888	0.005
9.86633	0.1375	9.87633	0.14	9.87867	0.1575	9.87233	0.14	9.88167	0.175	9.896	0.005
9.87433	0.14	9.88433	0.1375	9.88667	0.1575	9.88033	0.1375	9.88967	0.175	9.904	0.0025
9.88233	0.13	9.89233	0.1425	9.895	0.16	9.88833	0.14	9.89767	0.165	9.91233	0.0025
9.89033	0.1325	9.90033	0.135	9.903	0.1525	9.89633	0.135	9.906	0.1725	9.92033	0
9.89867	0.135	9.90833	0.14	9.911	0.1575	9.90433	0.14	9.914	0.175	9.92833	0.0075
9.90667	0.14	9.91667	0.1425	9.919	0.155	9.91233	0.135	9.922	0.175	9.93633	0.005
9.91467	0.14	9.92467	0.14	9.927	0.1575	9.92033	0.14	9.93	0.1725	9.94433	0.0025
9.92267	0.135	9.93267	0.135	9.935	0.1525	9.92867	0.1375	9.93833	0.175	9.95267	0
9.93067	0.1425	9.94067	0.1375	9.943	0.1575	9.93667	0.14	9.94633	0.175	9.96067	0.005
9.939	0.1375	9.94867	0.1375	9.951	0.1575	9.94467	0.14	9.95433	0.1775
9.947	0.1325	9.95667	0.145	9.95933	0.16	9.95267	0.135	9.96233	0.175
9.955	0.13	9.965	0.1375	9.96733	0.1575	9.961	0.14	9.97033	0.175
9.963	0.1375	9.973	0.14	9.97533	0.155	9.969	0.145	9.97867	0.18
9.971	0.1375	9.981	0.1375	9.98367	0.1525	9.977	0.145	9.98633	0.1825
9.979	0.14	9.989	0.145	9.99167	0.16	9.985	0.14	9.99467	0.1725
9.98733	0.135	9.997	0.14	9.99967	0.1575	9.993	0.14	10.0027	0.1775
9.99533	0.1375	10.0053	0.1375	10.0077	0.155	10.001	0.1375	10.0107	0.175
10.0033	0.14	10.0133	0.14	10.016	0.1575	10.009	0.1425	10.019	0.18
10.0113	0.135	10.0213	0.14	10.024	0.16	10.017	0.14	10.0267	0.175
10.0193	0.1375	10.0293	0.14	10.032	0.1575	10.025	0.1425	10.035	0.1825
10.0273	0.1325	10.0373	0.14	10.04	0.1575	10.033	0.14	10.043	0.18
10.0353	0.14	10.0457	0.145	10.048	0.155	10.041	0.1425	10.051	0.1825
10.0433	0.14	10.0537	0.14	10.0563	0.155	10.049	0.145	10.0593	0.1725
10.0513	0.1425	10.0617	0.14	10.0643	0.1575	10.057	0.14	10.0673	0.18
10.0593	0.14	10.0697	0.14	10.0723	0.1575	10.0653	0.14	10.0753	0.18
10.0673	0.14	10.0777	0.1375	10.0803	0.1575	10.073	0.14	10.0833	0.1825
10.0753	0.14	10.086	0.1425	10.0883	0.1575	10.0813	0.14	10.0913	0.1775
10.0833	0.1375	10.094	0.14	10.0963	0.155	10.0893	0.14	10.0997	0.18
10.0917	0.135	10.102	0.14	10.1047	0.1575	10.0973	0.14	10.1077	0.1825
10.0997	0.14	10.11	0.14	10.1127	0.16	10.1057	0.14	10.1157	0.1825
10.1077	0.14	10.118	0.145	10.1207	0.16	10.1137	0.1425	10.1237	0.1825
10.1157	0.1425	10.1263	0.1425	10.1287	0.1575	10.1217	0.1475	10.1317	0.1825
10.1237	0.14	10.1343	0.14	10.1367	0.16	10.1297	0.14	10.14	0.1775
10.132	0.14	10.1423	0.14	10.145	0.1575	10.1377	0.1425	10.1477	0.1775
10.14	0.14	10.1503	0.1425	10.153	0.1625	10.146	0.145	10.156	0.18
10.148	0.1425	10.1583	0.14	10.161	0.1575	10.1537	0.1475	10.164	0.18
10.156	0.1325	10.1663	0.145	10.169	0.1575	10.162	0.14	10.172	0.1775
10.164	0.14	10.1747	0.14	10.177	0.1625	10.17	0.14	10.1803	0.1825
10.172	0.1375	10.1827	0.1425	10.1853	0.1575	10.178	0.14	10.1883	0.1825
10.1803	0.14	10.1907	0.145	10.1933	0.16	10.186	0.14	10.1963	0.1825
10.1883	0.14	10.1987	0.1425	10.2013	0.1575	10.194	0.14	10.2043	0.1825
10.1963	0.1425	10.207	0.14	10.2093	0.16	10.202	0.1425	10.2123	0.18
10.2043	0.1375	10.215	0.14	10.2173	0.16	10.2103	0.145	10.2207	0.18
10.2123	0.1375	10.223	0.14	10.2257	0.16	10.2183	0.1475	10.2287	0.1825
10.2203	0.14	10.231	0.14	10.2337	0.1575	10.2267	0.1425	10.2367	0.1775
10.2287	0.14	10.239	0.14	10.2417	0.16	10.2343	0.145	10.2447	0.175
10.2367	0.1425	10.2473	0.1425	10.2497	0.16	10.2427	0.1425	10.2527	0.175
10.2447	0.1425	10.2553	0.14	10.2577	0.16	10.2507	0.145	10.261	0.18
10.2527	0.14	10.2633	0.1425	10.266	0.16	10.2587	0.1375	10.269	0.18
10.2607	0.14	10.2713	0.1425	10.274	0.1625	10.267	0.1475	10.277	0.18
10.2687	0.1425	10.2797	0.145	10.282	0.1625	10.275	0.14	10.285	0.175
10.277	0.1375	10.2877	0.1375	10.29	0.16	10.283	0.1475	10.293	0.1825
10.285	0.14	10.2957	0.1425	10.298	0.16	10.291	0.14	10.301	0.1775
10.293	0.14	10.3037	0.1425	10.3063	0.16	10.299	0.14	10.3093	0.1775
10.301	0.14	10.3117	0.1425	10.3143	0.16	10.3073	0.145	10.3173	0.175
10.309	0.1425	10.32	0.14	10.3223	0.16	10.315	0.1475	10.3253	0.1825
10.3173	0.1425	10.3277	0.145	10.3303	0.1625	10.3233	0.14	10.3337	0.175
10.3253	0.1425	10.336	0.1475	10.3383	0.165	10.3313	0.1425	10.3413	0.1775
10.3333	0.1425	10.344	0.145	10.3467	0.1575	10.3393	0.1475	10.3497	0.1775
10.3413	0.145	10.352	0.1375	10.3547	0.1625	10.3473	0.145	10.3577	0.1775
10.3493	0.14	10.3603	0.145	10.3627	0.1575	10.3557	0.15	10.3657	0.175
10.3577	0.1425	10.368	0.14	10.3707	0.1625	10.3637	0.1475	10.374	0.18
10.3653	0.1425	10.3763	0.145	10.3787	0.1625	10.3717	0.145	10.382	0.175
10.3737	0.145	10.3843	0.14	10.3867	0.1625	10.3797	0.1475	10.39	0.18
10.3817	0.145	10.3923	0.1425	10.395	0.16	10.3877	0.1425	10.398	0.1825
10.3897	0.1425	10.4003	0.14	10.403	0.1625	10.3957	0.145	10.4063	0.18
10.3977	0.1425	10.4083	0.145	10.411	0.16	10.404	0.145	10.4143	0.175
10.4057	0.14	10.4167	0.145	10.419	0.1625	10.412	0.145	10.4223	0.1775
10.414	0.14	10.4247	0.1425	10.4273	0.165	10.42	0.1475	10.4303	0.1775
10.422	0.1425	10.4327	0.145	10.4353	0.1625	10.428	0.1475	10.4383	0.1775
10.43	0.14	10.4407	0.1425	10.4433	0.1625	10.4363	0.145	10.4467	0.18
10.438	0.1425	10.4487	0.1425	10.4513	0.1625	10.444	0.15	10.4547	0.185
10.446	0.145	10.4567	0.1475	10.4593	0.165	10.452	0.1425	10.4627	0.18
10.4543	0.1425	10.465	0.145	10.4673	0.165	10.4603	0.1475	10.4707	0.1825
10.4623	0.1425	10.473	0.145	10.4757	0.16	10.4683	0.1425	10.4787	0.175
10.47	0.1425	10.481	0.1425	10.4837	0.165	10.4763	0.1475	10.4867	0.1825
10.4783	0.145	10.4893	0.1475	10.4917	0.16	10.4843	0.145	10.495	0.18
10.4867	0.1475	10.4973	0.1425	10.4997	0.165	10.4923	0.1425	10.503	0.1775
10.4943	0.145	10.5053	0.145	10.5077	0.16	10.5003	0.14	10.511	0.1775
10.5027	0.145	10.5133	0.145	10.516	0.1625	10.5083	0.1475	10.5193	0.185
10.5103	0.1475	10.5217	0.1475	10.524	0.16	10.5167	0.145	10.527	0.18
10.5187	0.1475	10.5293	0.145	10.532	0.165	10.5247	0.1475	10.5353	0.1775
10.5267	0.1425	10.5377	0.145	10.54	0.165	10.5327	0.145	10.5433	0.18
10.5347	0.145	10.5457	0.14	10.548	0.165	10.5407	0.14	10.5513	0.185
10.5427	0.1425	10.5537	0.1475	10.5563	0.165	10.5487	0.1525	10.5593	0.1825
10.5507	0.145	10.5617	0.1425	10.5643	0.165	10.557	0.15	10.5677	0.18
10.5587	0.145	10.5697	0.145	10.5723	0.16	10.565	0.145	10.5757	0.1775
10.567	0.1425	10.5777	0.14	10.5803	0.165	10.573	0.1425	10.5837	0.1825
10.575	0.145	10.586	0.1475	10.5887	0.1625	10.5813	0.1475	10.5917	0.18
10.583	0.1475	10.594	0.1475	10.5963	0.165	10.589	0.145	10.5997	0.1825
10.5913	0.1475	10.602	0.1475	10.6047	0.165	10.5973	0.1475	10.608	0.18
10.599	0.145	10.61	0.145	10.6127	0.1625	10.6057	0.145	10.6157	0.185
10.6073	0.1475	10.618	0.1475	10.6207	0.165	10.6133	0.155	10.624	0.18
10.6153	0.145	10.6263	0.1475	10.629	0.165	10.6217	0.15	10.632	0.18
10.6233	0.1475	10.6343	0.1475	10.637	0.16	10.6293	0.145	10.64	0.1775
10.6313	0.14	10.6423	0.1475	10.645	0.1625	10.6377	0.15	10.6483	0.1825
10.6393	0.1475	10.6503	0.15	10.653	0.1625	10.6457	0.1475	10.6563	0.1825
10.6477	0.145	10.6587	0.1475	10.6613	0.165	10.6537	0.1475	10.6643	0.18
10.6553	0.1475	10.6667	0.1475	10.669	0.16	10.662	0.1475	10.6723	0.1725
10.6637	0.1475	10.6747	0.145	10.6773	0.165	10.67	0.15	10.6807	0.175
10.6717	0.1475	10.6827	0.15	10.6853	0.165	10.678	0.1475	10.6883	0.1725
10.6797	0.145	10.691	0.1475	10.6933	0.1625	10.686	0.15	10.6967	0.175
10.688	0.145	10.6987	0.15	10.7013	0.165	10.694	0.15	10.7047	0.06
10.6957	0.14	10.707	0.1425	10.7097	0.1625	10.702	0.145	10.7127	0
10.704	0.1475	10.715	0.145	10.7177	0.16	10.7103	0.1475	10.721	0
10.712	0.15	10.723	0.1475	10.7257	0.165	10.7183	0.1525	10.729	0.005
10.72	0.1475	10.731	0.1475	10.7337	0.1625	10.7263	0.1475	10.737	0
10.728	0.1475	10.739	0.1475	10.742	0.1675	10.7343	0.145	10.745	0.005
10.7363	0.1475	10.7473	0.1475	10.75	0.1675	10.7423	0.1475	10.753	0
10.744	0.145	10.7553	0.1475	10.758	0.165	10.7507	0.1475	10.761	0
10.7523	0.1475	10.7633	0.1475	10.766	0.165	10.7583	0.1525	10.7693	0
10.7603	0.1475	10.7713	0.1475	10.774	0.165	10.7667	0.1475	10.7773	0.0025
10.7683	0.15	10.7797	0.1525	10.782	0.165	10.7747	0.15	10.7853	0.0025
10.7767	0.15	10.7877	0.1475	10.7903	0.1625	10.7827	0.15	10.7937	0
10.7843	0.1475	10.7957	0.15	10.7983	0.1675	10.7907	0.1475	10.8013	0
10.7927	0.1475	10.8037	0.145	10.8063	0.16	10.7987	0.1475	10.8097	0
10.8007	0.15	10.8117	0.1475	10.8143	0.165	10.807	0.1475	10.8177	0.0025
10.8087	0.1475	10.82	0.1475	10.8223	0.165	10.815	0.15	10.8257	0
10.817	0.1475	10.8277	0.15	10.8307	0.165	10.823	0.1475	10.8337	0.0025
10.8247	0.1475	10.836	0.145	10.8383	0.165	10.831	0.1525	10.842	0.005
10.833	0.1475	10.844	0.15	10.8467	0.165	10.839	0.1475	10.85	0
10.8407	0.1475	10.852	0.1475	10.8547	0.1675	10.847	0.1525	10.858	0.0025
10.849	0.1475	10.8603	0.15	10.8627	0.165	10.8553	0.15	10.866	0
10.8573	0.1475	10.8683	0.145	10.871	0.165	10.8633	0.1475	10.874	0.0025
10.865	0.1475	10.8763	0.15	10.879	0.165	10.8713	0.1525	10.882	0.005
10.873	0.1575	10.8843	0.15	10.887	0.17	10.8793	0.1525	10.8903	0
10.8813	0.1475	10.8927	0.15	10.895	0.165	10.8873	0.1525	10.8983	0.0025
10.8893	0.145	10.9003	0.145	10.903	0.17	10.8957	0.1525	10.9063	0
10.8973	0.15	10.9083	0.1475	10.911	0.165	10.9033	0.1475	10.9143	0
10.9053	0.15	10.9163	0.1475	10.919	0.165	10.9113	0.155	10.9227	0
10.9137	0.1475	10.9243	0.1575	10.9273	0.1675	10.9193	0.1475	10.9307	0.0025
10.9213	0.1475	10.9327	0.15	10.9353	0.1675	10.9273	0.15	10.9387	0
10.9297	0.15	10.9407	0.1525	10.9433	0.165	10.9357	0.1525	10.9467	0.0025
10.9377	0.155	10.9487	0.1475	10.9513	0.1725	10.9433	0.1525	10.9547	0
10.9457	0.1475	10.9567	0.15	10.9597	0.165	10.9513	0.1525	10.9627	0.0025
10.9537	0.1475	10.965	0.145	10.9677	0.165	10.9597	0.15	10.971	0.0025
10.9617	0.15	10.9727	0.1525	10.9757	0.1675	10.9677	0.1475
10.9697	0.1475	10.9807	0.15	10.9837	0.165	10.9757	0.15
10.978	0.145	10.989	0.1525	10.9917	0.1625	10.9837	0.155
10.986	0.15	10.997	0.1475	10.9997	0.165	10.9917	0.145
10.994	0.1525	11.005	0.1525	11.0077	0.1675	11	0.1475
11.002	0.155	11.013	0.1475	11.016	0.175	11.0077	0.15
11.01	0.1475	11.0213	0.155	11.024	0.165	11.016	0.1525
11.018	0.1525	11.0293	0.15	11.032	0.175	11.024	0.1525
11.0263	0.1475	11.0373	0.15	11.04	0.17	11.032	0.15
11.0343	0.1525	11.0457	0.1475	11.048	0.17	11.04	0.155
11.0423	0.15	11.0533	0.1575	11.0563	0.1675	11.048	0.1475
11.0503	0.155	11.0613	0.145	11.0643	0.165	11.0563	0.1525
11.0583	0.15	11.0697	0.1525	11.0723	0.1725	11.0643	0.15
11.0663	0.1475	11.0777	0.1525	11.0803	0.17	11.0723	0.15
11.0747	0.1475	11.0857	0.1475	11.0883	0.1675	11.0807	0.1525
11.0823	0.155	11.094	0.1425	11.0967	0.1725	11.0887	0.155
11.0903	0.15	11.102	0.1525	11.1047	0.1675	11.0967	0.155
11.0987	0.1525	11.11	0.145	11.1127	0.175	11.1047	0.1575
11.1067	0.1475	11.118	0.1525	11.1207	0.1675	11.1127	0.1475
11.1147	0.155	11.126	0.1475	11.1287	0.1725	11.1207	0.155
11.1227	0.1475	11.134	0.1525	11.137	0.1675	11.1287	0.1525
11.131	0.155	11.142	0.1525	11.145	0.17	11.137	0.155
11.139	0.15	11.1503	0.155	11.153	0.175	11.145	0.1525
11.147	0.155	11.1583	0.15	11.161	0.175	11.153	0.155
11.155	0.15	11.1663	0.15	11.169	0.17	11.161	0.1575
11.1633	0.155	11.1747	0.1525	11.1773	0.17	11.169	0.1575
11.1713	0.1525	11.1823	0.155	11.1853	0.165	11.177	0.1525
11.179	0.1525	11.1907	0.1575	11.1933	0.17	11.1853	0.1575
11.1873	0.1575	11.1987	0.15	11.2013	0.1725	11.1933	0.1525
11.1953	0.155	11.2067	0.1525	11.2093	0.1725	11.2013	0.1575
11.2033	0.15	11.215	0.155	11.2173	0.165	11.2097	0.1575
11.2113	0.15	11.223	0.1475	11.2257	0.17	11.2177	0.1575
11.2193	0.15	11.231	0.1525	11.2337	0.17	11.2257	0.1525
11.2277	0.1575	11.239	0.1475	11.2417	0.17	11.2337	0.1525
11.2357	0.15	11.247	0.1575	11.2497	0.1675	11.2417	0.1575
11.2437	0.1525	11.255	0.1525	11.2577	0.17	11.2497	0.1575
11.2517	0.1525	11.263	0.1525	11.266	0.1725	11.2577	0.155
11.2597	0.1475	11.271	0.1575	11.274	0.175	11.266	0.1575
11.2677	0.1525	11.2793	0.1525	11.282	0.1675	11.274	0.1575
11.276	0.1525	11.2873	0.155	11.2903	0.1725	11.282	0.1575
11.284	0.15	11.2953	0.155	11.298	0.1725	11.29	0.1575
11.292	0.1525	11.3033	0.155	11.3063	0.17	11.298	0.1525
11.3	0.1525	11.3113	0.1575	11.3143	0.1675	11.306	0.16
11.308	0.1575	11.3197	0.15	11.3223	0.17	11.3137	0.1575
11.3163	0.1525	11.3277	0.155	11.3303	0.1725	11.322	0.1575
11.324	0.15	11.336	0.1525	11.3383	0.17	11.33	0.16
11.3323	0.1525	11.344	0.1575	11.3467	0.17	11.338	0.1525
11.3403	0.1575	11.352	0.1475	11.3547	0.175	11.346	0.16
11.3483	0.1575	11.36	0.1575	11.3627	0.1725	11.3543	0.1575
11.3567	0.1525	11.368	0.1525	11.3707	0.175	11.362	0.1575
11.3643	0.155	11.376	0.155	11.3787	0.1725	11.3703	0.1575
11.3723	0.155	11.3843	0.1525	11.387	0.1725	11.3783	0.1575
11.3807	0.1575	11.3923	0.1575	11.395	0.17	11.3863	0.1575
11.3887	0.1525	11.4003	0.1575	11.403	0.175	11.3947	0.155
11.3967	0.1525	11.4083	0.155	11.411	0.1725	11.4023	0.1525
11.405	0.1525	11.4167	0.1575	11.4193	0.17	11.4103	0.155
11.413	0.1525	11.4247	0.155	11.4273	0.175	11.4187	0.16
11.421	0.1575	11.4327	0.155	11.4353	0.175	11.4267	0.1575
11.429	0.1575	11.4407	0.165	11.4433	0.1675	11.4347	0.1575
11.4373	0.155	11.4487	0.1575	11.4513	0.17	11.4427	0.1575
11.445	0.1525	11.4567	0.155	11.4593	0.17	11.4507	0.1575
11.4533	0.1575	11.465	0.1525	11.4673	0.175	11.459	0.16
11.4613	0.1575	11.473	0.1575	11.4757	0.175	11.467	0.1575
11.4693	0.1575	11.481	0.1475	11.4837	0.175	11.4753	0.1575
11.4773	0.155	11.489	0.1575	11.4917	0.175	11.483	0.1575
11.4857	0.1575	11.497	0.155	11.4997	0.17	11.491	0.16
11.4933	0.1575	11.5053	0.155	11.5077	0.1675	11.4993	0.16
11.5017	0.1575	11.5133	0.1475	11.516	0.175	11.5073	0.155
11.5097	0.1575	11.5213	0.16	11.524	0.1725	11.5153	0.1575
11.5177	0.155	11.5293	0.155	11.532	0.1725	11.5233	0.1575
11.5257	0.1575	11.5377	0.1525	11.54	0.1725	11.5313	0.1575
11.5337	0.1575	11.5457	0.155	11.5483	0.175	11.5397	0.16
11.5417	0.16	11.5537	0.1525	11.5563	0.175	11.5477	0.1575
11.55	0.1575	11.5617	0.1575	11.5643	0.1725	11.5557	0.16
11.558	0.155	11.57	0.1525	11.5723	0.17	11.5637	0.1575
11.566	0.1575	11.5777	0.1575	11.5803	0.175	11.5717	0.1575
11.574	0.1575	11.586	0.155	11.5883	0.1725	11.58	0.1575
11.582	0.16	11.594	0.155	11.5967	0.1725	11.5877	0.1575
11.59	0.1575	11.602	0.1525	11.6047	0.1725	11.596	0.1575
11.598	0.155	11.61	0.15	11.6127	0.175	11.604	0.1575
11.6063	0.1575	11.618	0.16	11.6207	0.1725	11.612	0.1575
11.614	0.1575	11.6263	0.155	11.629	0.175	11.6203	0.16
11.6223	0.1575	11.6343	0.15	11.637	0.175	11.6283	0.165
11.6303	0.16	11.6423	0.15	11.645	0.175	11.6363	0.1575
11.6383	0.155	11.6507	0.155	11.653	0.175	11.6443	0.1575
11.6467	0.1575	11.6583	0.1575	11.6613	0.175	11.6523	0.1575
11.6543	0.1575	11.6667	0.1575	11.6693	0.175	11.6603	0.1575
11.6627	0.1575	11.6747	0.155	11.6773	0.175	11.6687	0.16
11.6707	0.16	11.6827	0.1575	11.6853	0.1725	11.6767	0.1625
11.6787	0.1575	11.6907	0.1525	11.6933	0.175	11.6847	0.16
11.6867	0.16	11.6987	0.155	11.7013	0.175	11.6927	0.16
11.6947	0.1575	11.707	0.1525	11.7097	0.175	11.7007	0.1575
11.703	0.1575	11.715	0.1575	11.7177	0.175	11.709	0.16
11.7107	0.1575	11.723	0.155	11.7257	0.1775	11.717	0.16
11.719	0.1575	11.731	0.1575	11.7337	0.175	11.725	0.1575
11.727	0.1575	11.739	0.155	11.742	0.18	11.733	0.16
11.735	0.1575	11.7473	0.1575	11.75	0.175	11.741	0.16
11.743	0.1575	11.7553	0.1525	11.758	0.175	11.7493	0.1625
11.751	0.1575	11.7633	0.1525	11.766	0.175	11.757	0.1625
11.7593	0.1575	11.7713	0.1575	11.774	0.175	11.7653	0.165
11.767	0.1575	11.7797	0.1575	11.782	0.175	11.7733	0.16
11.7753	0.1575	11.7877	0.1575	11.7903	0.1775	11.7813	0.1625
11.7833	0.1575	11.7957	0.1575	11.7983	0.175	11.7893	0.1575
11.7913	0.1575	11.8037	0.155	11.8063	0.175	11.7973	0.165
11.7993	0.1625	11.8117	0.1575	11.8147	0.1725	11.8053	0.1625
11.8073	0.1625	11.82	0.1575	11.8223	0.18	11.8137	0.165
11.8157	0.1575	11.8277	0.16	11.8307	0.17	11.8217	0.165
11.8233	0.16	11.836	0.1575	11.8383	0.175	11.8297	0.1625
11.8317	0.1575	11.844	0.16	11.8467	0.1775	11.8377	0.16
11.8397	0.16	11.852	0.1575	11.8547	0.175	11.8457	0.165
11.8477	0.16	11.8603	0.16	11.863	0.175	11.854	0.16
11.856	0.1625	11.868	0.1575	11.871	0.175	11.862	0.165
11.864	0.1575	11.8763	0.16	11.879	0.1725	11.87	0.1625
11.872	0.1575	11.8843	0.16	11.887	0.1775	11.878	0.1625
11.88	0.1575	11.8923	0.1575	11.895	0.1775	11.886	0.1575
11.888	0.1575	11.9003	0.155	11.9033	0.1775	11.894	0.165
11.896	0.16	11.9087	0.1575	11.9113	0.1775	11.902	0.165
11.904	0.16	11.9167	0.16	11.9193	0.175	11.9103	0.165
11.9123	0.1625	11.9247	0.1575	11.9273	0.1725	11.9183	0.1625
11.9203	0.16	11.9327	0.155	11.9357	0.175	11.9263	0.16
11.928	0.1625	11.9407	0.155	11.9433	0.175	11.9347	0.1625
11.9363	0.1575	11.949	0.16	11.9517	0.1775	11.9423	0.165
11.9447	0.1625	11.957	0.1575	11.9597	0.175	11.9507	0.1625
11.9523	0.16	11.965	0.1575	11.9677	0.175	11.9587	0.165
11.9607	0.1625	11.973	0.1575	11.976	0.1775	11.9667	0.16
11.9687	0.1575	11.981	0.1575	11.984	0.1775	11.9747	0.165
11.9767	0.1625	11.9893	0.16	11.992	0.175	11.9827	0.1625
11.985	0.165	11.9973	0.1575	12	0.175	11.991	0.1625
11.9927	0.16	12.0053	0.155	12.008	0.175	11.999	0.1575
12.001	0.1625	12.0133	0.1575	12.016	0.18	12.007	0.165
12.0087	0.1625	12.0213	0.16	12.024	0.175	12.0153	0.1625
12.017	0.1625	12.0297	0.155	12.0323	0.1775	12.0233	0.1675
12.025	0.1575	12.0377	0.16	12.0403	0.175	12.0313	0.1575
12.033	0.16	12.0457	0.16	12.0483	0.175	12.0393	0.165
12.041	0.16	12.0537	0.16	12.0563	0.175	12.0473	0.16
12.049	0.165	12.062	0.16	12.0647	0.175	12.0553	0.165
12.0573	0.165	12.07	0.1625	12.0727	0.175	12.0637	0.165
12.0653	0.165	12.078	0.1575	12.0807	0.1775	12.0713	0.165
12.0733	0.1625	12.086	0.16	12.0887	0.18	12.0797	0.1675
12.0813	0.1625	12.094	0.16	12.0967	0.18	12.0877	0.165
12.0893	0.1625	12.102	0.16	12.105	0.175	12.0957	0.16
12.0973	0.165	12.1103	0.16	12.113	0.18	12.104	0.165
12.1053	0.1625	12.1183	0.1625	12.121	0.1775	12.1117	0.165
12.1133	0.1625	12.1263	0.1575	12.129	0.175	12.12	0.165
12.1213	0.1625	12.1347	0.165	12.137	0.175	12.128	0.16
12.1297	0.165	12.1423	0.1575	12.1453	0.175	12.136	0.165
12.1377	0.1575	12.1507	0.16	12.1533	0.175	12.1443	0.165
12.1457	0.165	12.1587	0.1525	12.1613	0.175	12.152	0.165
12.1537	0.16	12.1667	0.1575	12.1693	0.1775	12.1603	0.165
12.1617	0.165	12.175	0.1575	12.1773	0.1775	12.1683	0.165
12.17	0.165	12.1827	0.1575	12.1857	0.1725	12.1763	0.165
12.1777	0.1675	12.191	0.1575	12.1937	0.1775	12.1843	0.165
12.186	0.1575	12.199	0.165	12.2017	0.1775	12.1927	0.16
12.194	0.16	12.207	0.16	12.2097	0.1775	12.2007	0.165
12.202	0.1625	12.215	0.1625	12.2177	0.18	12.2087	0.165
12.21	0.1625	12.223	0.16	12.2257	0.1825	12.2167	0.165
12.218	0.16	12.2313	0.165	12.234	0.175	12.2247	0.165
12.2263	0.165	12.2393	0.16	12.242	0.18	12.233	0.165
12.2343	0.1625	12.2473	0.1575	12.25	0.175	12.2407	0.1625
12.2423	0.165	12.2553	0.1575	12.258	0.18	12.249	0.165
12.2503	0.1625	12.2637	0.165	12.2663	0.175	12.2567	0.1575
12.2583	0.165	12.2713	0.1575	12.2743	0.1825	12.265	0.165
12.2663	0.1625	12.2797	0.16	12.2823	0.18	12.273	0.165
12.2747	0.1625	12.2877	0.1625	12.2903	0.18	12.281	0.165
12.2827	0.165	12.2957	0.16	12.2983	0.1775	12.289	0.165
12.2907	0.1625	12.3037	0.16	12.3067	0.1825	12.297	0.165
12.2987	0.165	12.3117	0.16	12.3147	0.18	12.3053	0.165
12.3067	0.165	12.32	0.16	12.3227	0.18	12.3133	0.17
12.315	0.16	12.328	0.1625	12.3307	0.175	12.3213	0.1625
12.3227	0.165	12.3363	0.16	12.3387	0.1825	12.3297	0.165
12.331	0.1625	12.344	0.165	12.347	0.18	12.3373	0.165
12.339	0.165	12.3523	0.16	12.355	0.1825	12.3457	0.17
12.347	0.16	12.3603	0.16	12.363	0.1775	12.3537	0.165
12.355	0.165	12.3683	0.1625	12.371	0.18	12.3617	0.1675
12.363	0.16	12.3763	0.165	12.379	0.1825	12.3697	0.165
12.3713	0.165	12.3843	0.1575	12.3873	0.1775	12.3777	0.165
12.3793	0.1625	12.3927	0.165	12.3953	0.1775	12.3857	0.1625
12.3873	0.165	12.4007	0.1625	12.4033	0.1775	12.394	0.165
12.3953	0.165	12.4087	0.1625	12.4113	0.1775	12.402	0.16
12.4033	0.165	12.4167	0.1575	12.4193	0.18	12.41	0.1675
12.4117	0.1625	12.425	0.1625	12.4273	0.175	12.418	0.165
12.4197	0.1625	12.433	0.16	12.4357	0.1825	12.426	0.165
12.4277	0.165	12.441	0.165	12.4437	0.1775	12.4343	0.165
12.4357	0.165	12.449	0.165	12.4517	0.18	12.4423	0.1675
12.444	0.165	12.457	0.165	12.4597	0.175	12.4503	0.17
12.4517	0.1675	12.4653	0.16	12.4677	0.18	12.4587	0.1625
12.4597	0.165	12.4733	0.1675	12.476	0.1775	12.4663	0.165
12.4677	0.1625	12.4813	0.16	12.484	0.1775	12.4747	0.1625
12.4757	0.1625	12.4893	0.165	12.492	0.1775	12.4827	0.165
12.484	0.1675	12.4973	0.16	12.5	0.18	12.4907	0.165
12.492	0.17	12.5057	0.165	12.508	0.1825	12.4987	0.165
12.5	0.165	12.5137	0.1625	12.5163	0.1775	12.5067	0.165
12.508	0.165	12.5217	0.165	12.5243	0.1775	12.515	0.16
12.5163	0.165	12.5297	0.1625	12.5323	0.18	12.523	0.165
12.5243	0.165	12.5377	0.1625	12.5403	0.1775	12.531	0.1625
12.5323	0.165	12.546	0.1575	12.5483	0.1775	12.539	0.1625
12.5403	0.16	12.5537	0.165	12.5563	0.175	12.547	0.165
12.5483	0.16	12.562	0.1625	12.5647	0.18	12.555	0.1625
12.5567	0.1625	12.57	0.1625	12.5727	0.1775	12.5633	0.1625
12.5643	0.165	12.5783	0.16	12.5807	0.18	12.5713	0.1625
12.5727	0.1675	12.5863	0.1675	12.5887	0.175	12.5793	0.165
12.5807	0.1675	12.5943	0.1625	12.5967	0.1825	12.5873	0.1625
12.5887	0.165	12.6023	0.165	12.605	0.1775	12.5953	0.1625
12.5967	0.165	12.6103	0.16	12.6127	0.175	12.6037	0.1575
12.6047	0.1625	12.6183	0.165	12.621	0.1775	12.6113	0.1575
12.6127	0.165	12.6267	0.16	12.629	0.1825	12.6197	0.165
12.621	0.1675	12.6347	0.165	12.637	0.1775	12.6277	0.1375
12.629	0.165	12.6427	0.165	12.6453	0.1775	12.6357	0
12.637	0.1675	12.6507	0.165	12.6533	0.175	12.6437	0
12.645	0.1725	12.6587	0.1675	12.6613	0.18	12.6517	0
12.653	0.165	12.667	0.1625	12.6693	0.18	12.66	-0.0025
12.661	0.165	12.675	0.1575	12.6773	0.18	12.6677	-0.005
12.6693	0.165	12.683	0.165	12.6857	0.175	12.676	0
12.677	0.165	12.691	0.165	12.6933	0.18	12.684	0
12.6853	0.1625	12.699	0.1675	12.7017	0.1825	12.692	-0.0025
12.6933	0.1625	12.7073	0.16	12.7097	0.18	12.7	-0.0025
12.7013	0.165	12.7153	0.165	12.7177	0.18	12.7083	0
12.7097	0.165	12.7233	0.1625	12.7257	0.1775	12.716	-0.0025
12.7177	0.1675	12.7313	0.165	12.734	0.175	12.7243	0
12.7257	0.1675	12.7393	0.165	12.742	0.18	12.7323	-0.0025
12.7337	0.165	12.7473	0.1625	12.75	0.1775	12.7403	0
12.7417	0.165	12.7557	0.165	12.758	0.18	12.7487	0
12.7497	0.1675	12.7637	0.1675	12.766	0.175	12.7567	0
12.758	0.1675	12.7717	0.1625	12.7743	0.18	12.765	0
12.766	0.165	12.7797	0.165	12.7823	0.1775	12.773	-0.0025
12.774	0.165	12.788	0.165	12.7903	0.1825	12.781	-0.005
12.782	0.1675	12.796	0.17	12.7983	0.18	12.789	0
12.79	0.1675	12.804	0.165	12.8067	0.1825	12.797	0
12.7983	0.1675	12.812	0.1675	12.8147	0.1775	12.8053	-0.005
12.8063	0.165	12.82	0.16	12.8227	0.185	12.8133	0
12.8143	0.1725	12.828	0.165	12.8307	0.18	12.8213	0
12.8223	0.17	12.8363	0.1575	12.8387	0.1825	12.8293	-0.0025
12.8303	0.17	12.8443	0.165	12.8467	0.18	12.8373	-0.005
12.8383	0.17	12.8523	0.1625	12.855	0.1825	12.8453	-0.005
12.8463	0.17	12.8603	0.165	12.863	0.18
12.8547	0.17	12.8683	0.16	12.871	0.18
12.8627	0.17	12.8767	0.1675	12.879	0.175
12.8707	0.165	12.8847	0.165	12.887	0.1825
12.8787	0.17	12.8927	0.165	12.8953	0.1825
12.8867	0.165	12.9007	0.1575	12.9033	0.18
12.895	0.17	12.9087	0.165	12.9113	0.1775
12.903	0.17	12.917	0.1625	12.9193	0.1825
12.911	0.175	12.925	0.165	12.9273	0.1775
12.919	0.17	12.933	0.1625	12.9357	0.18
12.927	0.165	12.941	0.165	12.9437	0.1775
12.935	0.1675	12.949	0.165	12.9517	0.18
12.9433	0.17	12.957	0.1675	12.9597	0.1775
12.9513	0.1725	12.9653	0.165	12.9677	0.1775
12.9593	0.1675	12.9733	0.165	12.9757	0.175
12.9673	0.17	12.9813	0.1675	12.984	0.1825
12.9753	0.1675	12.9893	0.1675	12.992	0.1775
12.9837	0.1725	12.9973	0.165	13	0.18
12.9913	0.17	13.0053	0.165	13.008	0.175
12.9997	0.17	13.0133	0.1675	13.0163	0.1825
13.0077	0.165	13.0213	0.17	13.0243	0.1825
13.0157	0.1675	13.0293	0.1675	13.0323	0.18
13.0237	0.1675	13.0373	0.165	13.0403	0.175
13.0317	0.1725	13.0457	0.165	13.0483	0.18
13.04	0.1725	13.0537	0.1675	13.0567	0.18
13.048	0.1725	13.0617	0.1625	13.0647	0.18
13.056	0.1675	13.0697	0.17	13.0727	0.175
13.064	0.1725	13.0777	0.165	13.0807	0.1825
13.072	0.1675	13.086	0.1675	13.0887	0.18
13.0803	0.1725	13.094	0.165	13.0967	0.1775
13.0883	0.17	13.102	0.1675	13.105	0.17
13.096	0.1725	13.11	0.165	13.1127	0.18
13.1043	0.1725	13.118	0.1725	13.121	0.1725
13.1123	0.1775	13.126	0.165	13.129	0.175
13.1203	0.17	13.1343	0.1675	13.137	0.175
13.1283	0.175	13.1423	0.1625	13.1453	0.175
13.1363	0.1725	13.1503	0.165	13.153	0.175
13.1443	0.17	13.1583	0.1625	13.1613	0.1725
13.1527	0.1675	13.1667	0.1675	13.1693	0.1375
13.1607	0.175	13.1747	0.165	13.1773	0.0075
13.1687	0.1725	13.1827	0.17	13.1857	0.005
13.1767	0.17	13.191	0.1625	13.1937	0
13.185	0.17	13.1987	0.1675	13.2017	0.0025
13.193	0.175	13.207	0.165	13.2097	0.0025
13.201	0.1675	13.215	0.1725	13.2177	0.005
13.209	0.175	13.223	0.165	13.2257	0.0025
13.217	0.1725	13.231	0.1675	13.2337	0.0025
13.225	0.175	13.239	0.1625	13.242	0.0025
13.233	0.1725	13.2473	0.165	13.25	0.0075
13.2413	0.175	13.2553	0.165	13.258	0.0025
13.2493	0.17	13.2633	0.1675	13.266	0
13.2573	0.1725	13.2713	0.1675	13.274	0.0075
13.2653	0.175	13.2797	0.165	13.282	0.0025
13.2733	0.175	13.2877	0.165	13.2903	0
13.2813	0.175	13.2957	0.165	13.298	0
13.2893	0.175	13.3037	0.16	13.3063	0.0025
13.2977	0.175	13.3117	0.1675
13.3057	0.175	13.32	0.165
13.3137	0.175	13.328	0.165
13.3217	0.1725	13.336	0.165
13.33	0.175	13.344	0.1675
13.338	0.175	13.352	0.165
13.3457	0.17	13.3603	0.1675
13.354	0.1725	13.368	0.16
13.362	0.175	13.3763	0.165
13.3703	0.175	13.3843	0.165
13.378	0.1725	13.3923	0.1625
13.3863	0.175	13.4003	0.16
13.3943	0.17	13.4087	0.165
13.4023	0.17	13.4167	0.1575
13.4103	0.175	13.4247	0.16
13.4183	0.17	13.4327	0.1525
13.4263	0.175	13.441	0.1525
13.4347	0.175	13.449	0.145
13.4427	0.17	13.4567	0.1475
13.4507	0.17	13.465	0.1325
13.4587	0.175	13.473	0.1375
13.4667	0.1725	13.481	0.055
13.4747	0.1725	13.489	0
13.483	0.17	13.497	0
13.491	0.175	13.5053	0.005
13.499	0.1725	13.5133	0
13.507	0.175	13.5213	-0.0025
13.5153	0.175	13.5293	0.0025
13.5233	0.1725	13.5373	0
13.531	0.175	13.5457	0
13.5393	0.175	13.5537	0
13.5473	0.175	13.5617	-0.0025
13.5553	0.175	13.5697	0
13.5633	0.1725	13.5777	0
13.5717	0.1725	13.586	0.0025
13.5797	0.175	13.594	0
13.5877	0.17	13.602	0
13.5957	0.175	13.61	0
13.6037	0.175
13.6117	0.1725
13.62	0.17
13.628	0.175
13.636	0.175
13.644	0.175
13.6523	0.175
13.6603	0.175
13.6683	0.1725
13.6763	0.175
13.6843	0.175
13.6923	0.17
13.7007	0.175
13.7087	0.1775
13.7163	0.175
13.7247	0.175
13.7327	0.17
13.741	0.1725
13.7487	0.1675
13.757	0.1725
13.765	0.1725
13.773	0.1725
13.781	0.17
13.789	0.1725
13.7973	0.1725
13.8053	0.1725
13.8133	0.1725
13.8213	0.175
13.8293	0.17
13.8373	0.175
13.8453	0.17
13.8537	0.175
13.8617	0.1725
13.8697	0.175
13.8777	0.175
13.8857	0.1775
13.8937	0.175
13.902	0.1775
13.91	0.1725
13.918	0.17
13.926	0.1725
13.934	0.175
13.9423	0.175
13.95	0.175
13.9583	0.175
13.9663	0.18
13.9743	0.175
13.9827	0.1775
13.9903	0.1775
13.9987	0.1775
14.0063	0.18
14.0147	0.175
14.0227	0.18
14.0307	0.18
14.039	0.175
14.047	0.175
14.055	0.18
14.063	0.175
14.071	0.1775
14.0793	0.18
14.087	0.175
14.0953	0.1775
14.1033	0.1775
14.1113	0.1825
14.1193	0.18
14.1273	0.18
14.1353	0.1775
14.1437	0.1825
14.1517	0.18
14.1597	0.1825
14.1677	0.18
14.1757	0.1825
14.1837	0.1825
14.192	0.1825
14.2	0.1775
14.208	0.1825
14.216	0.18
14.2243	0.1825
14.2323	0.18
14.2403	0.1825
14.2483	0.18
14.2563	0.18
14.2643	0.1825
14.2727	0.1775
14.2807	0.18
14.2883	0.1775
14.2967	0.1775
14.3047	0.18
14.3127	0.1875
14.3207	0.175
14.3287	0.1825
14.337	0.1775
14.3447	0.1825
14.353	0.1825
14.361	0.18
14.369	0.1825
14.377	0.1825
14.3847	0.18
14.393	0.175
14.401	0.1775
14.409	0.175
14.417	0.1825
14.425	0.18
14.433	0.1825
14.4413	0.18
14.4493	0.1825
14.4573	0.18
14.4653	0.1825
14.4733	0.1775
14.4817	0.1825
14.4897	0.1825
14.4977	0.1825
14.5057	0.1825
14.5137	0.18
14.522	0.1825
14.5297	0.18
14.538	0.18
14.546	0.1775
14.554	0.18
14.562	0.18
14.5703	0.1775
14.5783	0.18
14.5863	0.18
14.5943	0.18
14.6023	0.18
14.6107	0.18
14.6183	0.18
14.6267	0.18
14.6347	0.18
14.6427	0.175
14.651	0.1825
14.6587	0.18
14.667	0.1825
14.6747	0.1825
14.683	0.18
14.691	0.18
14.699	0.1825
14.707	0.1825
14.715	0.1825
14.7233	0.1825
14.7313	0.18
14.7393	0.1825
14.7473	0.1825
14.7557	0.18
14.7633	0.1825
14.7717	0.1825
14.7797	0.1825
14.7877	0.1825
14.7957	0.1825
14.8037	0.1775
14.812	0.1825
14.82	0.1825
14.828	0.18
14.836	0.1825
14.844	0.185
14.852	0.1875
14.8603	0.1825
14.8683	0.1825
14.8763	0.1825
14.8843	0.1825
14.8923	0.1825
14.9003	0.1825
14.9087	0.1825
14.9167	0.18
14.9247	0.1825
14.9327	0.1825
14.941	0.1825
14.9487	0.18
14.957	0.185
14.965	0.19
14.973	0.1825
14.9813	0.1825
14.989	0.185
14.9973	0.1825
15.0053	0.1825
15.0133	0.1825
15.0213	0.1825
15.0293	0.1875
15.0373	0.185
15.0453	0.1825
15.0533	0.1825
15.0617	0.1825
15.0697	0.1825
15.0777	0.1825
15.0857	0.1825
15.0937	0.1875
15.102	0.185
15.11	0.1825
15.118	0.185
15.126	0.1825
15.134	0.1825
15.142	0.1775
15.1503	0.185
15.1583	0.1875
15.1663	0.1925
15.1743	0.1825
15.1823	0.185
15.1903	0.1825
15.1983	0.185
15.2067	0.1825
15.2147	0.1825
15.2227	0.1825
15.2307	0.185
15.2387	0.1825
15.247	0.185
15.255	0.1825
15.263	0.1825
15.271	0.18
15.279	0.1825
15.287	0.1825
15.2953	0.185
15.3033	0.1825
15.3113	0.18
15.3193	0.18
15.3273	0.1775
15.3357	0.175
15.3437	0.175
15.3517	0.165
15.3597	0.035
15.3677	0.005
15.3757	0.0075
15.3837	0.0075
15.392	0.0075
15.4	0
15.408	0.005
15.416	0.0075
15.424	0.01
15.4323	0.0075
15.4403	0.0075
15.4483	0.0025
15.4563	0.0075
15.4643	0.0075
15.4723	0.005
15.4807	0
15.4883	0.005
15.4967	0
15.5047	0.0025
15.5127	0
15.521	0.005
15.5287	0
15.5367	0.0075
15.545	0.005
15.553	0.005
15.561	0.0075
15.5693	0.0075
15.577	0
15.5853	0.0025
15.5933	0
15.6013	0.0025
15.6093	0.0025
15.6173	0
15.6253	0.01
15.6337	0.0025
15.6417	0.005
15.6497	0.0075
15.6577	0.0025
15.6657	0.0075
15.6737	0.005
15.682	0.0075
15.69	0.005
15.698	0.01
15.706	0.0125
15.714	0.01
15.7223	0.01
15.7303	0.0075
15.7383	0.005
15.7463	0.005
15.7543	0.005
15.7623	0.015
15.7707	0.01
15.7787	0.01
15.7867	0.0075
15.7947	0.015
15.8027	0.005
15.811	0.0025
15.819	0.005
15.827	0.015
15.835	0.005
15.8427	0.0075
15.8513	0.005
15.859	0.01
