# Supplementary material for: The influence of thermal treatments on the secondary structure of silk fibroin scaffolds and their interaction with fibroblasts
Source: PeerJ journal article supplement (doi:10.7717/peerj-matsci.8), 2020-09-01
Supplement: raw_date_of_Figure_for_the_review_#2.xlsx [file raw_date_of_Figure_for_the_review_%232.xlsx]

## Sheet: Sheet1
Non		60		80		95		AC		DH
Time (sec)	CA (o)	Time (sec)	CA (o)	Time (sec)	CA (o)	Time (sec)	CA (o)	Time (sec)	CA (o)	Time (sec)	CA (o)
0	33.49	0	27.22	0	41.4	0	33.75	0	32.73	0	68.2
0.0313	5.2	0.0469	1.78	0.0313	7.03	0.0468	4.4	0.0312	14.5	0.0469	66.7
0.0782	5.23	0.0781	1.92	0.0782	7.05	0.0781	4.76	0.0625	14.68	0.0781	65.61
0.1094	5.72	0.1094	1.85	0.1094	7.15	0.1093	4.46	0.1094	14.2	0.1094	64.58
0.1563	6.28	0.1562	1.86	0.1563	7.01	0.1562	3.9	0.1406	13.72	0.1563	63.4
0.1875	5.15	0.1875	1.5	0.1875	7.12	0.1875	4.31	0.1719	4.59	0.1875	62.44
0.2188	5.65	0.2187	1.93	0.2188	7.16	0.2343	4.48	0.2187	13.17	0.2188	61.25
0.2657	5.28	0.2656	3.67	0.2656	7.14	0.2656	4.8	0.25	15.95	0.2656	59.79
0.2969	7.34	0.2968	1.87	0.2969	6.96	0.2968	4.74	0.2969	7.26	0.2969	58.49
0.3282	8.9	0.3437	1.92	0.344	7.16	0.3437	8.4	0.3281	17.28	0.3438	57.28
0.375	8.23	0.375	1.93	0.375	7.35	0.375	5.05	0.3594	16.38	0.375	56.13
0.4063	5.03	0.4062	1.35	0.4062	7.03	0.4062	6.1	0.4062	19.16	0.4063	53.92
0.4532	9.36	0.4531	2.04	0.4531	6.94	0.4531	5.23	0.4375	13.475	0.4532	53.03
0.4844	5.75	0.4843	1.87	0.4844	7.12	0.4843	6.02	0.4844	7.79	0.4844	51.69
0.5157	5.82	0.5312	1.67	0.5313	7.15	0.5312	4.68	0.5156	11.43	0.5313	50.49
0.5626	8.33	0.5625	2.39	0.5625	7.03	0.5625	6.06	0.5469	13.55	0.5625	48.21
0.5938	9.97	0.5937	1.85	0.5937	7.01	0.5937	9.83	0.5938	14.13	0.5938	46.7
0.6407	7.52	0.6406	1.93	0.6407	7.67	0.6406	4.58	0.625	10.09	0.6407	43.67
0.6719	9.32	0.6718	1.96	0.6719	7.12	0.6718	4.93	0.6562	8.38	0.6719	41.15
0.7032	8.88	0.7031	3.73	0.7031	7.02	0.7187	3.73	0.7031	14.67	0.7187	40.86
0.7501	8.48	0.75	1.99	0.75	7.12	0.7499	4.54	0.7344	13.98	0.75	39.5
0.7813	5.66	0.7812	1.89	0.7813	7.18	0.7812	4.4	0.7812	15.53	0.7813	38.91
0.8127	5.39	0.8281	1.37	0.8281	7.15	0.8281	5.18	0.8125	13.74	0.8281	35.96
0.8594	8.58	0.8594	1.98	0.8594	7.07	0.8593	4.35	0.8437	14.9	0.8594	34.56
0.8907	5.87	0.8906	1.36	0.8906	7.23	0.8906	4.75	0.8906	14.4	0.8906	32.41
0.9375	5.44	0.9375	2.3	0.9375	7.05	0.9375	4.21	0.9219	15.37	0.9375	28.94
0.9688	5.53	0.9687	1.93	0.9688	7.06	0.9687	7.75	0.9687	13.21	0.9687	27.02
