# Supplementary material for: The influence of thermal treatments on the secondary structure of silk fibroin scaffolds and their interaction with fibroblasts
Source: PeerJ journal article supplement (doi:10.7717/peerj-matsci.8), 2020-09-01
Supplement: raw_date_of_Figure_for_the_review_#3.xlsx [file raw_date_of_Figure_for_the_review_%233.xlsx]

## Sheet: Sheet1
raw data	NON	37 oC	50 oC	60 oC	80 oC	95 oC	AC	DH		ppm	NON	ppm	37 oC	ppm	50 oC	ppm	60 oC	ppm	80 oC	ppm	95 oC	ppm	AC	ppm	DH
	0.0402576	0.0450886	0.0466989	0.0338164	0.0305958	0.0483092	0.0434783	0.0354267		231.516	0.0602576	231.516	0.215089	231.516	0.366699	231.669	0.503816	231.516	0.650596	231.516	0.818309	231.516	0.963478	231.516	1.10543
	0.0434783	0.0434783	0.0402576	0.0338164	0.037037	0.0531401	0.0434783	0.0354267		230.741	0.0634783	230.741	0.213478	230.741	0.360258	230.894	0.503816	230.741	0.657037	230.741	0.82314	230.741	0.963478	230.741	1.10543
	0.037037	0.0338164	0.0338164	0.0354267	0.0273752	0.0434783	0.041868	0.0305958		229.965	0.057037	229.965	0.203816	229.965	0.353816	230.118	0.505427	229.965	0.647375	229.965	0.813478	229.965	0.961868	229.965	1.1006
	0.0434783	0.0402576	0.0483092	0.0354267	0.037037	0.0386473	0.0483092	0.0354267		229.19	0.0634783	229.19	0.210258	229.19	0.368309	229.343	0.505427	229.19	0.657037	229.19	0.808647	229.19	0.968309	229.19	1.10543
	0.0386473	0.041868	0.0402576	0.0322061	0.0450886	0.0273752	0.037037	0.0322061		228.414	0.0586473	228.414	0.211868	228.414	0.360258	228.567	0.502206	228.414	0.665089	228.414	0.797375	228.414	0.957037	228.414	1.10221
	0.0338164	0.0450886	0.0450886	0.0402576	0.0434783	0.0322061	0.0338164	0.0338164		227.639	0.0538164	227.639	0.215089	227.639	0.365089	227.792	0.510258	227.639	0.663478	227.639	0.802206	227.639	0.953816	227.639	1.10382
	0.0402576	0.0402576	0.0354267	0.037037	0.0305958	0.0450886	0.0354267	0.037037		226.863	0.0602576	226.863	0.210258	226.863	0.355427	227.016	0.507037	226.863	0.650596	226.863	0.815089	226.863	0.955427	226.863	1.10704
	0.0338164	0.0434783	0.0322061	0.0322061	0.0386473	0.037037	0.0338164	0.037037		226.088	0.0538164	226.088	0.213478	226.088	0.352206	226.241	0.502206	226.088	0.658647	226.088	0.807037	226.088	0.953816	226.088	1.10704
	0.037037	0.037037	0.0289855	0.037037	0.0338164	0.041868	0.037037	0.0402576		225.312	0.057037	225.312	0.207037	225.312	0.348986	225.465	0.507037	225.312	0.653816	225.312	0.811868	225.312	0.957037	225.312	1.11026
	0.0338164	0.0338164	0.0354267	0.0322061	0.037037	0.0322061	0.0434783	0.0354267		224.537	0.0538164	224.537	0.203816	224.537	0.355427	224.69	0.502206	224.537	0.657037	224.537	0.802206	224.537	0.963478	224.537	1.10543
	0.0289855	0.041868	0.0322061	0.0354267	0.037037	0.0450886	0.0386473	0.0386473		223.761	0.0489855	223.761	0.211868	223.761	0.352206	223.914	0.505427	223.761	0.657037	223.761	0.815089	223.761	0.958647	223.761	1.10865
	0.0402576	0.037037	0.0225443	0.0338164	0.0289855	0.0338164	0.0402576	0.0322061		222.986	0.0602576	222.986	0.207037	222.986	0.342544	223.139	0.503816	222.986	0.648986	222.986	0.803816	222.986	0.960258	222.986	1.10221
	0.041868	0.037037	0.037037	0.0305958	0.0322061	0.0434783	0.0273752	0.0338164		222.21	0.061868	222.21	0.207037	222.21	0.357037	222.363	0.500596	222.21	0.652206	222.21	0.813478	222.21	0.947375	222.21	1.10382
	0.0305958	0.0354267	0.0354267	0.0338164	0.0450886	0.0434783	0.0386473	0.0402576		221.435	0.0505958	221.435	0.205427	221.435	0.355427	221.588	0.503816	221.435	0.665089	221.435	0.813478	221.435	0.958647	221.435	1.11026
	0.0354267	0.0354267	0.0450886	0.0322061	0.0289855	0.0466989	0.0338164	0.0386473		220.659	0.0554267	220.659	0.205427	220.659	0.365089	220.812	0.502206	220.659	0.648986	220.659	0.816699	220.659	0.953816	220.659	1.10865
	0.0305958	0.0273752	0.0450886	0.0273752	0.0193237	0.041868	0.041868	0.0322061		219.884	0.0505958	219.884	0.197375	219.884	0.365089	220.037	0.497375	219.884	0.639324	219.884	0.811868	219.884	0.961868	219.884	1.10221
	0.0257649	0.0322061	0.0225443	0.0386473	0.0322061	0.037037	0.0322061	0.0338164		219.108	0.0457649	219.108	0.202206	219.108	0.342544	219.261	0.508647	219.108	0.652206	219.108	0.807037	219.108	0.952206	219.108	1.10382
	0.0386473	0.0386473	0.0338164	0.037037	0.037037	0.0434783	0.0289855	0.0305958		218.333	0.0586473	218.333	0.208647	218.333	0.353816	218.486	0.507037	218.333	0.657037	218.333	0.813478	218.333	0.948986	218.333	1.1006
	0.0273752	0.0338164	0.0386473	0.0289855	0.0273752	0.0354267	0.0305958	0.0289855		217.557	0.0473752	217.557	0.203816	217.557	0.358647	217.711	0.498986	217.557	0.647375	217.557	0.805427	217.557	0.950596	217.557	1.09899
	0.0257649	0.0289855	0.0466989	0.0322061	0.0322061	0.0483092	0.0322061	0.0322061		216.782	0.0457649	216.782	0.198986	216.782	0.366699	216.935	0.502206	216.782	0.652206	216.782	0.818309	216.782	0.952206	216.782	1.10221
	0.0354267	0.041868	0.041868	0.0241546	0.0322061	0.037037	0.0386473	0.0338164		216.006	0.0554267	216.006	0.211868	216.006	0.361868	216.16	0.494155	216.006	0.652206	216.006	0.807037	216.006	0.958647	216.006	1.10382
	0.0257649	0.0338164	0.037037	0.0289855	0.0354267	0.037037	0.0338164	0.0225443		215.231	0.0457649	215.231	0.203816	215.231	0.357037	215.384	0.498986	215.231	0.655427	215.231	0.807037	215.231	0.953816	215.231	1.09254
	0.0193237	0.0434783	0.0305958	0.0322061	0.0322061	0.0354267	0.0322061	0.0338164		214.455	0.0393237	214.455	0.213478	214.455	0.350596	214.609	0.502206	214.455	0.652206	214.455	0.805427	214.455	0.952206	214.455	1.10382
	0.0322061	0.0354267	0.037037	0.0338164	0.0338164	0.0386473	0.037037	0.0322061		213.68	0.0522061	213.68	0.205427	213.68	0.357037	213.833	0.503816	213.68	0.653816	213.68	0.808647	213.68	0.957037	213.68	1.10221
	0.0225443	0.0305958	0.0450886	0.0273752	0.0386473	0.0402576	0.0322061	0.0273752		212.904	0.0425443	212.904	0.200596	212.904	0.365089	213.058	0.497375	212.904	0.658647	212.904	0.810258	212.904	0.952206	212.904	1.09738
	0.0257649	0.0305958	0.0354267	0.0386473	0.0257649	0.0466989	0.0322061	0.0322061		212.129	0.0457649	212.129	0.200596	212.129	0.355427	212.282	0.508647	212.129	0.645765	212.129	0.816699	212.129	0.952206	212.129	1.10221
	0.0322061	0.0338164	0.037037	0.0305958	0.0338164	0.0563607	0.037037	0.0305958		211.353	0.0522061	211.353	0.203816	211.353	0.357037	211.507	0.500596	211.353	0.653816	211.353	0.826361	211.353	0.957037	211.353	1.1006
	0.0322061	0.0338164	0.0402576	0.0257649	0.037037	0.0466989	0.0434783	0.0289855		210.578	0.0522061	210.578	0.203816	210.578	0.360258	210.731	0.495765	210.578	0.657037	210.578	0.816699	210.578	0.963478	210.578	1.09899
	0.0241546	0.0305958	0.0386473	0.0354267	0.0305958	0.0305958	0.0305958	0.0322061		209.802	0.0441546	209.802	0.200596	209.802	0.358647	209.956	0.505427	209.802	0.650596	209.802	0.800596	209.802	0.950596	209.802	1.10221
	0.0386473	0.0322061	0.0354267	0.0354267	0.0434783	0.0289855	0.0322061	0.0241546		209.027	0.0586473	209.027	0.202206	209.027	0.355427	209.18	0.505427	209.027	0.663478	209.027	0.798986	209.027	0.952206	209.027	1.09415
	0.0354267	0.0386473	0.0305958	0.0305958	0.0225443	0.0354267	0.0338164	0.0289855		208.251	0.0554267	208.251	0.208647	208.251	0.350596	208.405	0.500596	208.251	0.642544	208.251	0.805427	208.251	0.953816	208.251	1.09899
	0.0322061	0.0338164	0.0305958	0.0305958	0.0386473	0.0289855	0.0305958	0.0289855		207.476	0.0522061	207.476	0.203816	207.476	0.350596	207.629	0.500596	207.476	0.658647	207.476	0.798986	207.476	0.950596	207.476	1.09899
	0.0225443	0.0354267	0.0466989	0.0273752	0.00966184	0.0434783	0.0273752	0.0289855		206.7	0.0425443	206.7	0.205427	206.7	0.366699	206.854	0.497375	206.7	0.629662	206.7	0.813478	206.7	0.947375	206.7	1.09899
	0.0241546	0.0273752	0.0193237	0.0257649	0.0338164	0.0257649	0.0322061	0.020934		205.925	0.0441546	205.925	0.197375	205.925	0.339324	206.078	0.495765	205.925	0.653816	205.925	0.795765	205.925	0.952206	205.925	1.09093
	0.0193237	0.0338164	0.0354267	0.0305958	0.0273752	0.0273752	0.0305958	0.0257649		205.149	0.0393237	205.149	0.203816	205.149	0.355427	205.303	0.500596	205.149	0.647375	205.149	0.797375	205.149	0.950596	205.149	1.09576
	0.020934	0.0225443	0.0289855	0.0322061	0.0305958	0.041868	0.0338164	0.0241546		204.374	0.040934	204.374	0.192544	204.374	0.348986	204.527	0.502206	204.374	0.650596	204.374	0.811868	204.374	0.953816	204.374	1.09415
	0.0225443	0.0305958	0.0402576	0.0225443	0.0241546	0.0386473	0.037037	0.0354267		203.598	0.0425443	203.598	0.200596	203.598	0.360258	203.752	0.492544	203.598	0.644155	203.598	0.808647	203.598	0.957037	203.598	1.10543
	0.0177134	0.0273752	0.0177134	0.0273752	0.0273752	0.0322061	0.0338164	0.0225443		202.823	0.0377134	202.823	0.197375	202.823	0.337713	202.976	0.497375	202.823	0.647375	202.823	0.802206	202.823	0.953816	202.823	1.09254
	0.0338164	0.0241546	0.037037	0.0322061	0.0177134	0.0595813	0.0354267	0.0289855		202.047	0.0538164	202.047	0.194155	202.047	0.357037	202.201	0.502206	202.047	0.637713	202.047	0.829581	202.047	0.955427	202.047	1.09899
	0.0322061	0.0273752	0.0225443	0.0257649	0.0289855	0.0402576	0.020934	0.020934		201.272	0.0522061	201.272	0.197375	201.272	0.342544	201.425	0.495765	201.272	0.648986	201.272	0.810258	201.272	0.940934	201.272	1.09093
	0.0193237	0.0241546	0.037037	0.0273752	0.0273752	0.0402576	0.0338164	0.0193237		200.496	0.0393237	200.496	0.194155	200.496	0.357037	200.65	0.497375	200.496	0.647375	200.496	0.810258	200.496	0.953816	200.496	1.08932
	0.0257649	0.0322061	0.0338164	0.0322061	0.0289855	0.0402576	0.0289855	0.0225443		199.721	0.0457649	199.721	0.202206	199.721	0.353816	199.874	0.502206	199.721	0.648986	199.721	0.810258	199.721	0.948986	199.721	1.09254
	0.0225443	0.0273752	0.0289855	0.0241546	0.0257649	0.0354267	0.0273752	0.0305958		198.945	0.0425443	198.945	0.197375	198.945	0.348986	199.099	0.494155	198.945	0.645765	198.945	0.805427	198.945	0.947375	198.945	1.1006
	0.0289855	0.0289855	0.0354267	0.0289855	0.0338164	0.037037	0.0273752	0.0225443		198.17	0.0489855	198.17	0.198986	198.17	0.355427	198.323	0.498986	198.17	0.653816	198.17	0.807037	198.17	0.947375	198.17	1.09254
	0.0225443	0.0273752	0.0402576	0.0305958	0.0289855	0.0144928	0.0338164	0.0193237		197.394	0.0425443	197.394	0.197375	197.394	0.360258	197.548	0.500596	197.394	0.648986	197.394	0.784493	197.394	0.953816	197.394	1.08932
	0.0257649	0.0289855	0.0289855	0.0273752	0.0161031	0.0354267	0.0289855	0.0241546		196.619	0.0457649	196.619	0.198986	196.619	0.348986	196.772	0.497375	196.619	0.636103	196.619	0.805427	196.619	0.948986	196.619	1.09415
	0.020934	0.020934	0.0305958	0.0322061	0.0257649	0.0305958	0.0289855	0.0225443		195.843	0.040934	195.843	0.190934	195.843	0.350596	195.997	0.502206	195.843	0.645765	195.843	0.800596	195.843	0.948986	195.843	1.09254
	0.0241546	0.0273752	0.0177134	0.0322061	0.0322061	0.041868	0.0305958	0.0177134		195.068	0.0441546	195.068	0.197375	195.068	0.337713	195.221	0.502206	195.068	0.652206	195.068	0.811868	195.068	0.950596	195.068	1.08771
	0.020934	0.0257649	0.0402576	0.0257649	0.020934	0.0354267	0.0193237	0.0289855		194.292	0.040934	194.292	0.195765	194.292	0.360258	194.446	0.495765	194.292	0.640934	194.292	0.805427	194.292	0.939324	194.292	1.09899
	0.0273752	0.020934	0.037037	0.0305958	0.0257649	0.020934	0.0273752	0.020934		193.517	0.0473752	193.517	0.190934	193.517	0.357037	193.67	0.500596	193.517	0.645765	193.517	0.790934	193.517	0.947375	193.517	1.09093
	0.0289855	0.0177134	0.0289855	0.0322061	0.0177134	0.0354267	0.0322061	0.0225443		192.741	0.0489855	192.741	0.187713	192.741	0.348986	192.895	0.502206	192.741	0.637713	192.741	0.805427	192.741	0.952206	192.741	1.09254
	0.0225443	0.0289855	0.0289855	0.0322061	0.0241546	0.020934	0.0338164	0.0193237		191.966	0.0425443	191.966	0.198986	191.966	0.348986	192.119	0.502206	191.966	0.644155	191.966	0.790934	191.966	0.953816	191.966	1.08932
	0.0225443	0.0289855	0.0193237	0.0257649	0.0128824	0.0386473	0.0305958	0.0193237		191.19	0.0425443	191.19	0.198986	191.19	0.339324	191.344	0.495765	191.19	0.632882	191.19	0.808647	191.19	0.950596	191.19	1.08932
	0.0257649	0.0322061	0.0338164	0.0289855	0.0177134	0.0338164	0.0257649	0.0161031		190.415	0.0457649	190.415	0.202206	190.415	0.353816	190.568	0.498986	190.415	0.637713	190.415	0.803816	190.415	0.945765	190.415	1.0861
	0.0193237	0.0273752	0.0305958	0.0257649	0.0289855	0.0338164	0.0322061	0.0193237		189.639	0.0393237	189.639	0.197375	189.639	0.350596	189.793	0.495765	189.639	0.648986	189.639	0.803816	189.639	0.952206	189.639	1.08932
	0.020934	0.0241546	0.0289855	0.0338164	0.0177134	0.0305958	0.0273752	0.0241546		188.864	0.040934	188.864	0.194155	188.864	0.348986	189.017	0.503816	188.864	0.637713	188.864	0.800596	188.864	0.947375	188.864	1.09415
	0.0273752	0.0322061	0.037037	0.0273752	0.0128824	0.0305958	0.0305958	0.0193237		188.088	0.0473752	188.088	0.202206	188.088	0.357037	188.242	0.497375	188.088	0.632882	188.088	0.800596	188.088	0.950596	188.088	1.08932
	0.0193237	0.0273752	0.0241546	0.0338164	0.0257649	0.0241546	0.0322061	0.0257649		187.313	0.0393237	187.313	0.197375	187.313	0.344155	187.466	0.503816	187.313	0.645765	187.313	0.794155	187.313	0.952206	187.313	1.09576
	0.0257649	0.0257649	0.0338164	0.0289855	0.0193237	0.0225443	0.0289855	0.0241546		186.537	0.0457649	186.537	0.195765	186.537	0.353816	186.691	0.498986	186.537	0.639324	186.537	0.792544	186.537	0.948986	186.537	1.09415
	0.0273752	0.0193237	0.0305958	0.0241546	0.0161031	0.037037	0.0305958	0.0257649		185.762	0.0473752	185.762	0.189324	185.762	0.350596	185.915	0.494155	185.762	0.636103	185.762	0.807037	185.762	0.950596	185.762	1.09576
	0.0241546	0.0225443	0.0289855	0.0289855	0.0225443	0.037037	0.0289855	0.020934		184.986	0.0441546	184.986	0.192544	184.986	0.348986	185.14	0.498986	184.986	0.642544	184.986	0.807037	184.986	0.948986	184.986	1.09093
	0.0354267	0.0289855	0.0354267	0.0386473	0.0225443	0.0273752	0.0322061	0.0225443		184.211	0.0554267	184.211	0.198986	184.211	0.355427	184.364	0.508647	184.211	0.642544	184.211	0.797375	184.211	0.952206	184.211	1.09254
	0.0338164	0.0289855	0.0257649	0.041868	0.0161031	0.0434783	0.0354267	0.0338164		183.435	0.0538164	183.435	0.198986	183.435	0.345765	183.589	0.511868	183.435	0.636103	183.435	0.813478	183.435	0.955427	183.435	1.10382
	0.0354267	0.0289855	0.041868	0.0483092	0.0193237	0.037037	0.0289855	0.0322061		182.66	0.0554267	182.66	0.198986	182.66	0.361868	182.813	0.518309	182.66	0.639324	182.66	0.807037	182.66	0.948986	182.66	1.10221
	0.0322061	0.0338164	0.0499195	0.0499195	0.0289855	0.037037	0.041868	0.0322061		181.884	0.0522061	181.884	0.203816	181.884	0.369919	182.038	0.519919	181.884	0.648986	181.884	0.807037	181.884	0.961868	181.884	1.10221
	0.0531401	0.037037	0.0483092	0.0450886	0.0305958	0.0402576	0.0402576	0.0434783		181.109	0.0731401	181.109	0.207037	181.109	0.368309	181.262	0.515089	181.109	0.650596	181.109	0.810258	181.109	0.960258	181.109	1.11348
	0.0644122	0.0515298	0.0611916	0.0595813	0.0338164	0.0499195	0.0386473	0.041868		180.333	0.0844122	180.333	0.22153	180.333	0.381192	180.487	0.529581	180.333	0.653816	180.333	0.819919	180.333	0.958647	180.333	1.11187
	0.0724638	0.0692432	0.0724638	0.0756844	0.0499195	0.0611916	0.0611916	0.0676329		179.558	0.0924638	179.558	0.239243	179.558	0.392464	179.711	0.545684	179.558	0.669919	179.558	0.831192	179.558	0.981192	179.558	1.13763
	0.123994	0.111111	0.114332	0.117552	0.0772947	0.0917874	0.0805153	0.10306		178.782	0.143994	178.782	0.281111	178.782	0.434332	178.936	0.587552	178.782	0.697295	178.782	0.861787	178.782	1.00052	178.782	1.17306
	0.215781	0.196457	0.201288	0.193237	0.148148	0.123994	0.122383	0.172303		178.007	0.235781	178.007	0.366457	178.007	0.521288	178.16	0.663237	178.007	0.768148	178.007	0.893994	178.007	1.04238	178.007	1.2423
	0.297907	0.288245	0.299517	0.275362	0.219002	0.194847	0.183575	0.275362		177.231	0.317907	177.231	0.458245	177.231	0.619517	177.385	0.745362	177.231	0.839002	177.231	0.964847	177.231	1.10357	177.231	1.34536
	0.365539	0.346216	0.349436	0.344605	0.285024	0.280193	0.267311	0.333333		176.456	0.385539	176.456	0.516216	176.456	0.669436	176.609	0.814605	176.456	0.905024	176.456	1.05019	176.456	1.18731	176.456	1.40333
	0.466989	0.446055	0.449275	0.439614	0.383253	0.36715	0.36876	0.431562		175.68	0.486989	175.68	0.616055	175.68	0.769275	175.834	0.909614	175.68	1.00325	175.68	1.13715	175.68	1.28876	175.68	1.50156
	0.607085	0.566828	0.5781	0.574879	0.516908	0.502415	0.500805	0.566828		174.905	0.627085	174.905	0.736828	174.905	0.8981	175.058	1.04488	174.905	1.13691	174.905	1.27242	174.905	1.42081	174.905	1.63683
	0.769726	0.745572	0.758454	0.755233	0.706924	0.677939	0.669887	0.748792		174.129	0.789726	174.129	0.915572	174.129	1.07845	174.283	1.22523	174.129	1.32692	174.129	1.44794	174.129	1.58989	174.129	1.81879
	0.940419	0.925926	0.961353	0.94686	0.916264	0.927536	0.919485	0.914654		173.354	0.960419	173.354	1.09593	173.354	1.28135	173.507	1.41686	173.354	1.53626	173.354	1.69754	173.354	1.83948	173.354	1.98465
	1	1	1	1	1	1	0.990338	1		172.578	1.02	172.578	1.17	172.578	1.32	172.732	1.47	172.578	1.62	172.578	1.77	172.578	1.91034	172.578	2.07
	0.977456	0.983897	0.991948	0.967794	0.967794	0.917874	0.914654	0.983897		171.803	0.997456	171.803	1.1539	171.803	1.31195	171.956	1.43779	171.803	1.58779	171.803	1.68787	171.803	1.83465	171.803	2.0539
	0.987118	0.995169	0.99839	0.979066	0.983897	0.935588	0.924316	1		171.027	1.00712	171.027	1.16517	171.027	1.31839	171.181	1.44907	171.027	1.6039	171.027	1.70559	171.027	1.84432	171.027	2.07
	0.919485	0.951691	0.972625	0.959742	0.991948	0.974235	1	0.967794		170.252	0.939485	170.252	1.12169	170.252	1.29262	170.405	1.42974	170.252	1.61195	170.252	1.74424	170.252	1.92	170.252	2.03779
	0.771337	0.800322	0.816425	0.800322	0.879227	0.890499	0.890499	0.818035		169.476	0.791337	169.476	0.970322	169.476	1.13643	169.63	1.27032	169.476	1.49923	169.476	1.6605	169.476	1.8105	169.476	1.88804
	0.534622	0.557166	0.558776	0.558776	0.636071	0.637681	0.647343	0.592593		168.701	0.554622	168.701	0.727166	168.701	0.878776	168.854	1.02878	168.701	1.25607	168.701	1.40768	168.701	1.56734	168.701	1.66259
	0.312399	0.326892	0.326892	0.31562	0.383253	0.359098	0.386473	0.360709		167.925	0.332399	167.925	0.496892	167.925	0.646892	168.079	0.78562	167.925	1.00325	167.925	1.1291	167.925	1.30647	167.925	1.43071
	0.169082	0.165862	0.165862	0.152979	0.215781	0.186795	0.193237	0.193237		167.15	0.189082	167.15	0.335862	167.15	0.485862	167.303	0.622979	167.15	0.835781	167.15	0.956795	167.15	1.11324	167.15	1.26324
	0.0933977	0.099839	0.0917874	0.0756844	0.125604	0.10789	0.111111	0.114332		166.374	0.113398	166.374	0.269839	166.374	0.411787	166.528	0.545684	166.374	0.745604	166.374	0.87789	166.374	1.03111	166.374	1.18433
	0.0644122	0.0660225	0.0644122	0.0483092	0.0805153	0.0628019	0.0708535	0.0676329		165.599	0.0844122	165.599	0.236023	165.599	0.384412	165.752	0.518309	165.599	0.700515	165.599	0.832802	165.599	0.990853	165.599	1.13763
	0.0386473	0.0515298	0.041868	0.0257649	0.0708535	0.0466989	0.0499195	0.0611916		164.823	0.0586473	164.823	0.22153	164.823	0.361868	164.977	0.495765	164.823	0.690853	164.823	0.816699	164.823	0.969919	164.823	1.13119
	0.0483092	0.0466989	0.0354267	0.0305958	0.0595813	0.0563607	0.0466989	0.0466989		164.048	0.0683092	164.048	0.216699	164.048	0.355427	164.201	0.500596	164.048	0.679581	164.048	0.826361	164.048	0.966699	164.048	1.1167
	0.0386473	0.0354267	0.0322061	0.0289855	0.0466989	0.0402576	0.037037	0.0354267		163.272	0.0586473	163.272	0.205427	163.272	0.352206	163.426	0.498986	163.272	0.666699	163.272	0.810258	163.272	0.957037	163.272	1.10543
	0.0322061	0.0386473	0.0225443	0.0338164	0.0241546	0.041868	0.0322061	0.0354267		162.497	0.0522061	162.497	0.208647	162.497	0.342544	162.65	0.503816	162.497	0.644155	162.497	0.811868	162.497	0.952206	162.497	1.10543
	0.0289855	0.0305958	0.0386473	0.0241546	0.0338164	0.0531401	0.0338164	0.0402576		161.721	0.0489855	161.721	0.200596	161.721	0.358647	161.875	0.494155	161.721	0.653816	161.721	0.82314	161.721	0.953816	161.721	1.11026
	0.0289855	0.0402576	0.0354267	0.0289855	0.0402576	0.0499195	0.0241546	0.0305958		160.946	0.0489855	160.946	0.210258	160.946	0.355427	161.099	0.498986	160.946	0.660258	160.946	0.819919	160.946	0.944155	160.946	1.1006
	0.0305958	0.0273752	0.0338164	0.0305958	0.0402576	0.0305958	0.0434783	0.0305958		160.17	0.0505958	160.17	0.197375	160.17	0.353816	160.324	0.500596	160.17	0.660258	160.17	0.800596	160.17	0.963478	160.17	1.1006
	0.0289855	0.0338164	0.0338164	0.0257649	0.0402576	0.0515298	0.0402576	0.0354267		159.395	0.0489855	159.395	0.203816	159.395	0.353816	159.549	0.495765	159.395	0.660258	159.395	0.82153	159.395	0.960258	159.395	1.10543
	0.0499195	0.0483092	0.0531401	0.041868	0.0450886	0.0515298	0.0531401	0.0466989		158.619	0.0699195	158.619	0.218309	158.619	0.37314	158.773	0.511868	158.619	0.665089	158.619	0.82153	158.619	0.97314	158.619	1.1167
	0.0724638	0.0708535	0.0805153	0.0756844	0.078905	0.0756844	0.0805153	0.078905		157.844	0.0924638	157.844	0.240853	157.844	0.400515	157.998	0.545684	157.844	0.698905	157.844	0.845684	157.844	1.00052	157.844	1.1489
	0.111111	0.112721	0.119163	0.111111	0.117552	0.117552	0.115942	0.117552		157.068	0.131111	157.068	0.282721	157.068	0.439163	157.222	0.581111	157.068	0.737552	157.068	0.887552	157.068	1.03594	157.068	1.18755
	0.138486	0.141707	0.144928	0.140097	0.144928	0.151369	0.144928	0.138486		156.293	0.158486	156.293	0.311707	156.293	0.464928	156.447	0.610097	156.293	0.764928	156.293	0.921369	156.293	1.06493	156.293	1.20849
	0.114332	0.128824	0.112721	0.119163	0.132045	0.125604	0.127214	0.120773		155.517	0.134332	155.517	0.298824	155.517	0.432721	155.671	0.589163	155.517	0.752045	155.517	0.895604	155.517	1.04721	155.517	1.19077
	0.0950081	0.0917874	0.0805153	0.0772947	0.0966184	0.0901771	0.078905	0.0933977		154.742	0.115008	154.742	0.261787	154.742	0.400515	154.896	0.547295	154.742	0.716618	154.742	0.860177	154.742	0.998905	154.742	1.1634
	0.0547504	0.0611916	0.0515298	0.0483092	0.0595813	0.0563607	0.0595813	0.057971		153.966	0.0747504	153.966	0.231192	153.966	0.37153	154.12	0.518309	153.966	0.679581	153.966	0.826361	153.966	0.979581	153.966	1.12797
	0.0305958	0.0386473	0.0434783	0.0305958	0.0483092	0.037037	0.0466989	0.0402576		153.191	0.0505958	153.191	0.208647	153.191	0.363478	153.345	0.500596	153.191	0.668309	153.191	0.807037	153.191	0.966699	153.191	1.11026
	0.0273752	0.037037	0.0354267	0.0177134	0.0434783	0.0338164	0.0434783	0.0322061		152.415	0.0473752	152.415	0.207037	152.415	0.355427	152.569	0.487713	152.415	0.663478	152.415	0.803816	152.415	0.963478	152.415	1.10221
	0.0338164	0.0354267	0.0289855	0.0257649	0.0322061	0.037037	0.0289855	0.0354267		151.64	0.0538164	151.64	0.205427	151.64	0.348986	151.794	0.495765	151.64	0.652206	151.64	0.807037	151.64	0.948986	151.64	1.10543
	0.0161031	0.0289855	0.0225443	0.020934	0.0338164	0.0466989	0.0289855	0.0354267		150.864	0.0361031	150.864	0.198986	150.864	0.342544	151.018	0.490934	150.864	0.653816	150.864	0.816699	150.864	0.948986	150.864	1.10543
	0.0225443	0.0338164	0.0241546	0.0193237	0.037037	0.0466989	0.0289855	0.020934		150.089	0.0425443	150.089	0.203816	150.089	0.344155	150.243	0.489324	150.089	0.657037	150.089	0.816699	150.089	0.948986	150.089	1.09093
	0.0257649	0.020934	0.0241546	0.0273752	0.0338164	0.0450886	0.0257649	0.0257649		149.313	0.0457649	149.313	0.190934	149.313	0.344155	149.467	0.497375	149.313	0.653816	149.313	0.815089	149.313	0.945765	149.313	1.09576
	0.0177134	0.0305958	0.00966184	0.0241546	0.0338164	0.0466989	0.0273752	0.0257649		148.538	0.0377134	148.538	0.200596	148.538	0.329662	148.692	0.494155	148.538	0.653816	148.538	0.816699	148.538	0.947375	148.538	1.09576
	0.0225443	0.0305958	0.0322061	0.020934	0.0257649	0.0289855	0.0322061	0.0241546		147.762	0.0425443	147.762	0.200596	147.762	0.352206	147.916	0.490934	147.762	0.645765	147.762	0.798986	147.762	0.952206	147.762	1.09415
	0.0161031	0.0257649	0.0305958	0.0241546	0.0338164	0.0354267	0.0305958	0.0273752		146.987	0.0361031	146.987	0.195765	146.987	0.350596	147.141	0.494155	146.987	0.653816	146.987	0.805427	146.987	0.950596	146.987	1.09738
	0.0112721	0.0305958	0.020934	0.00966184	0.0354267	0.0289855	0.0305958	0.0241546		146.211	0.0312721	146.211	0.200596	146.211	0.340934	146.365	0.479662	146.211	0.655427	146.211	0.798986	146.211	0.950596	146.211	1.09415
	0.0241546	0.0257649	0.0338164	0.020934	0.0257649	0.037037	0.0289855	0.0273752		145.436	0.0441546	145.436	0.195765	145.436	0.353816	145.59	0.490934	145.436	0.645765	145.436	0.807037	145.436	0.948986	145.436	1.09738
	0.0338164	0.0241546	0.0257649	0.0193237	0.0305958	0.037037	0.0273752	0.0241546		144.66	0.0538164	144.66	0.194155	144.66	0.345765	144.814	0.489324	144.66	0.650596	144.66	0.807037	144.66	0.947375	144.66	1.09415
	0.020934	0.0289855	0.0273752	0.0241546	0.0402576	0.0241546	0.0322061	0.0257649		143.885	0.040934	143.885	0.198986	143.885	0.347375	144.039	0.494155	143.885	0.660258	143.885	0.794155	143.885	0.952206	143.885	1.09576
	0.0177134	0.0305958	0.0273752	0.0289855	0.0305958	0.0402576	0.0402576	0.0225443		143.109	0.0377134	143.109	0.200596	143.109	0.347375	143.263	0.498986	143.109	0.650596	143.109	0.810258	143.109	0.960258	143.109	1.09254
	0.0177134	0.0322061	0.0225443	0.0193237	0.0225443	0.0273752	0.0289855	0.0305958		142.334	0.0377134	142.334	0.202206	142.334	0.342544	142.488	0.489324	142.334	0.642544	142.334	0.797375	142.334	0.948986	142.334	1.1006
	0.0241546	0.0322061	0.0322061	0.0257649	0.0177134	0.0225443	0.0354267	0.0273752		141.558	0.0441546	141.558	0.202206	141.558	0.352206	141.712	0.495765	141.558	0.637713	141.558	0.792544	141.558	0.955427	141.558	1.09738
	0.0257649	0.0322061	0.0338164	0.0338164	0.0434783	0.0483092	0.0322061	0.020934		140.783	0.0457649	140.783	0.202206	140.783	0.353816	140.937	0.503816	140.783	0.663478	140.783	0.818309	140.783	0.952206	140.783	1.09093
	0.0305958	0.037037	0.0257649	0.0273752	0.0289855	0.037037	0.037037	0.0354267		140.007	0.0505958	140.007	0.207037	140.007	0.345765	140.161	0.497375	140.007	0.648986	140.007	0.807037	140.007	0.957037	140.007	1.10543
	0.0273752	0.0354267	0.0273752	0.0338164	0.0354267	0.0515298	0.041868	0.0305958		139.232	0.0473752	139.232	0.205427	139.232	0.347375	139.386	0.503816	139.232	0.655427	139.232	0.82153	139.232	0.961868	139.232	1.1006
	0.0305958	0.0402576	0.0402576	0.0434783	0.0354267	0.057971	0.0466989	0.037037		138.456	0.0505958	138.456	0.210258	138.456	0.360258	138.61	0.513478	138.456	0.655427	138.456	0.827971	138.456	0.966699	138.456	1.10704
	0.041868	0.0434783	0.0499195	0.0386473	0.0547504	0.0483092	0.041868	0.0402576		137.681	0.061868	137.681	0.213478	137.681	0.369919	137.835	0.508647	137.681	0.67475	137.681	0.818309	137.681	0.961868	137.681	1.11026
	0.0483092	0.0466989	0.0515298	0.0515298	0.0450886	0.0547504	0.0563607	0.0450886		136.905	0.0683092	136.905	0.216699	136.905	0.37153	137.059	0.52153	136.905	0.665089	136.905	0.82475	136.905	0.976361	136.905	1.11509
	0.0483092	0.0515298	0.0499195	0.0515298	0.041868	0.0595813	0.0547504	0.0531401		136.13	0.0683092	136.13	0.22153	136.13	0.369919	136.284	0.52153	136.13	0.661868	136.13	0.829581	136.13	0.97475	136.13	1.12314
	0.0483092	0.0515298	0.0563607	0.0434783	0.0499195	0.0563607	0.0628019	0.0483092		135.354	0.0683092	135.354	0.22153	135.354	0.376361	135.508	0.513478	135.354	0.669919	135.354	0.826361	135.354	0.982802	135.354	1.11831
	0.057971	0.0644122	0.0547504	0.0644122	0.0515298	0.0563607	0.0611916	0.0611916		134.579	0.077971	134.579	0.234412	134.579	0.37475	134.733	0.534412	134.579	0.67153	134.579	0.826361	134.579	0.981192	134.579	1.13119
	0.0821256	0.0821256	0.0756844	0.0805153	0.0805153	0.0885668	0.0869565	0.0821256		133.803	0.102126	133.803	0.252126	133.803	0.395684	133.957	0.550515	133.803	0.700515	133.803	0.858567	133.803	1.00696	133.803	1.15213
	0.0982287	0.117552	0.10789	0.10789	0.099839	0.115942	0.115942	0.114332		133.028	0.118229	133.028	0.287552	133.028	0.42789	133.182	0.57789	133.028	0.719839	133.028	0.885942	133.028	1.03594	133.028	1.18433
	0.138486	0.1562	0.143317	0.146538	0.135266	0.149758	0.1562	0.15781		132.252	0.158486	132.252	0.3262	132.252	0.463317	132.406	0.616538	132.252	0.755266	132.252	0.919758	132.252	1.0762	132.252	1.22781
	0.177134	0.196457	0.180354	0.185185	0.178744	0.21256	0.190016	0.199678		131.477	0.197134	131.477	0.366457	131.477	0.500354	131.631	0.655185	131.477	0.798744	131.477	0.98256	131.477	1.11002	131.477	1.26968
	0.188406	0.222222	0.219002	0.202899	0.201288	0.21095	0.217391	0.215781		130.701	0.208406	130.701	0.392222	130.701	0.539002	130.855	0.672899	130.701	0.821288	130.701	0.98095	130.701	1.13739	130.701	1.28578
	0.199678	0.207729	0.207729	0.202899	0.206119	0.207729	0.21256	0.217391		129.926	0.219678	129.926	0.377729	129.926	0.527729	130.08	0.672899	129.926	0.826119	129.926	0.977729	129.926	1.13256	129.926	1.28739
	0.194847	0.206119	0.206119	0.191626	0.193237	0.198068	0.190016	0.206119		129.15	0.214847	129.15	0.376119	129.15	0.526119	129.304	0.661626	129.15	0.813237	129.15	0.968068	129.15	1.11002	129.15	1.27612
	0.177134	0.190016	0.180354	0.181965	0.180354	0.194847	0.188406	0.183575		128.375	0.197134	128.375	0.360016	128.375	0.500354	128.529	0.651965	128.375	0.800354	128.375	0.964847	128.375	1.10841	128.375	1.25357
	0.15942	0.164251	0.177134	0.149758	0.173913	0.170692	0.15942	0.167472		127.599	0.17942	127.599	0.334251	127.599	0.497134	127.753	0.619758	127.599	0.793913	127.599	0.940692	127.599	1.07942	127.599	1.23747
	0.133655	0.133655	0.133655	0.119163	0.120773	0.141707	0.123994	0.130435		126.824	0.153655	126.824	0.303655	126.824	0.453655	126.978	0.589163	126.824	0.740773	126.824	0.911707	126.824	1.04399	126.824	1.20043
	0.0885668	0.0982287	0.0901771	0.0853462	0.0901771	0.0869565	0.0950081	0.099839		126.048	0.108567	126.048	0.268229	126.048	0.410177	126.202	0.555346	126.048	0.710177	126.048	0.856957	126.048	1.01501	126.048	1.16984
	0.0547504	0.057971	0.0660225	0.0563607	0.0724638	0.0756844	0.0660225	0.0660225		125.273	0.0747504	125.273	0.227971	125.273	0.386023	125.427	0.526361	125.273	0.692464	125.273	0.845684	125.273	0.986023	125.273	1.13602
	0.0466989	0.0547504	0.0515298	0.0354267	0.0547504	0.0466989	0.0563607	0.0466989		124.497	0.0666989	124.497	0.22475	124.497	0.37153	124.651	0.505427	124.497	0.67475	124.497	0.816699	124.497	0.976361	124.497	1.1167
	0.0402576	0.0386473	0.0322061	0.0289855	0.0354267	0.0466989	0.0386473	0.037037		123.722	0.0602576	123.722	0.208647	123.722	0.352206	123.876	0.498986	123.722	0.655427	123.722	0.816699	123.722	0.958647	123.722	1.10704
	0.0322061	0.0386473	0.0354267	0.0322061	0.0305958	0.0483092	0.0483092	0.0402576		122.946	0.0522061	122.946	0.208647	122.946	0.355427	123.1	0.502206	122.946	0.650596	122.946	0.818309	122.946	0.968309	122.946	1.11026
	0.0305958	0.037037	0.0402576	0.0354267	0.0289855	0.0563607	0.0434783	0.0434783		122.171	0.0505958	122.171	0.207037	122.171	0.360258	122.325	0.505427	122.171	0.648986	122.171	0.826361	122.171	0.963478	122.171	1.11348
	0.0338164	0.0386473	0.0354267	0.0402576	0.0450886	0.0515298	0.0547504	0.0450886		121.395	0.0538164	121.395	0.208647	121.395	0.355427	121.549	0.510258	121.395	0.665089	121.395	0.82153	121.395	0.97475	121.395	1.11509
	0.0402576	0.0483092	0.0499195	0.0450886	0.0531401	0.0515298	0.0499195	0.0466989		120.62	0.0602576	120.62	0.218309	120.62	0.369919	120.774	0.515089	120.62	0.67314	120.62	0.82153	120.62	0.969919	120.62	1.1167
	0.0515298	0.0483092	0.0531401	0.0434783	0.0402576	0.0676329	0.0628019	0.0499195		119.844	0.0715298	119.844	0.218309	119.844	0.37314	119.998	0.513478	119.844	0.660258	119.844	0.837633	119.844	0.982802	119.844	1.11992
	0.0740741	0.0724638	0.0692432	0.057971	0.0644122	0.0756844	0.0692432	0.0724638		119.069	0.0940741	119.069	0.242464	119.069	0.389243	119.223	0.527971	119.069	0.684412	119.069	0.845684	119.069	0.989243	119.069	1.14246
	0.0853462	0.0901771	0.0869565	0.0885668	0.0837359	0.0901771	0.0966184	0.0982287		118.293	0.105346	118.293	0.260177	118.293	0.406957	118.447	0.558567	118.293	0.703736	118.293	0.860177	118.293	1.01662	118.293	1.16823
	0.10306	0.122383	0.111111	0.111111	0.10789	0.114332	0.114332	0.127214		117.518	0.12306	117.518	0.292383	117.518	0.431111	117.672	0.581111	117.518	0.72789	117.518	0.884332	117.518	1.03433	117.518	1.19721
	0.140097	0.1562	0.148148	0.149758	0.140097	0.15781	0.149758	0.148148		116.742	0.160097	116.742	0.3262	116.742	0.468148	116.896	0.619758	116.742	0.760097	116.742	0.92781	116.742	1.06976	116.742	1.21815
	0.162641	0.186795	0.15942	0.162641	0.15942	0.190016	0.169082	0.170692		115.967	0.182641	115.967	0.356795	115.967	0.47942	116.121	0.632641	115.967	0.77942	115.967	0.960016	115.967	1.08908	115.967	1.24069
	0.140097	0.170692	0.152979	0.144928	0.146538	0.170692	0.164251	0.1562		115.191	0.160097	115.191	0.340692	115.191	0.472979	115.345	0.614928	115.191	0.766538	115.191	0.940692	115.191	1.08425	115.191	1.2262
	0.099839	0.119163	0.10306	0.10628	0.109501	0.114332	0.120773	0.119163		114.416	0.119839	114.416	0.289163	114.416	0.42306	114.57	0.57628	114.416	0.729501	114.416	0.884332	114.416	1.04077	114.416	1.18916
	0.0676329	0.0805153	0.0644122	0.0644122	0.0724638	0.078905	0.0724638	0.0772947		113.64	0.0876329	113.64	0.250515	113.64	0.384412	113.794	0.534412	113.64	0.692464	113.64	0.848905	113.64	0.992464	113.64	1.14729
	0.037037	0.0531401	0.0563607	0.037037	0.0531401	0.0483092	0.0515298	0.0483092		112.865	0.057037	112.865	0.22314	112.865	0.376361	113.019	0.507037	112.865	0.67314	112.865	0.818309	112.865	0.97153	112.865	1.11831
	0.0305958	0.0450886	0.0386473	0.0322061	0.0434783	0.0515298	0.0386473	0.0386473		112.089	0.0505958	112.089	0.215089	112.089	0.358647	112.243	0.502206	112.089	0.663478	112.089	0.82153	112.089	0.958647	112.089	1.10865
	0.0257649	0.0289855	0.037037	0.0241546	0.0354267	0.0434783	0.0322061	0.0386473		111.314	0.0457649	111.314	0.198986	111.314	0.357037	111.468	0.494155	111.314	0.655427	111.314	0.813478	111.314	0.952206	111.314	1.10865
	0.0225443	0.0289855	0.0338164	0.0177134	0.0305958	0.0402576	0.0338164	0.0289855		110.538	0.0425443	110.538	0.198986	110.538	0.353816	110.692	0.487713	110.538	0.650596	110.538	0.810258	110.538	0.953816	110.538	1.09899
	0.0305958	0.0177134	0.0225443	0.0193237	0.0289855	0.0289855	0.0273752	0.0193237		109.763	0.0505958	109.763	0.187713	109.763	0.342544	109.917	0.489324	109.763	0.648986	109.763	0.798986	109.763	0.947375	109.763	1.08932
	0.0177134	0.0241546	0.0177134	0.0161031	0.00966184	0.0241546	0.0193237	0.0273752		108.987	0.0377134	108.987	0.194155	108.987	0.337713	109.141	0.486103	108.987	0.629662	108.987	0.794155	108.987	0.939324	108.987	1.09738
	0.0193237	0.0161031	0.0128824	0.0112721	0.0161031	0.0193237	0.020934	0.0193237		108.212	0.0393237	108.212	0.186103	108.212	0.332882	108.366	0.481272	108.212	0.636103	108.212	0.789324	108.212	0.940934	108.212	1.08932
	0.00966184	0.0193237	0.00805153	0.0161031	0.020934	0.0241546	0.0225443	0.0128824		107.436	0.0296618	107.436	0.189324	107.436	0.328052	107.59	0.486103	107.436	0.640934	107.436	0.794155	107.436	0.942544	107.436	1.08288
	0.0161031	0.0177134	0.0241546	0.00966184	0.0112721	0.020934	0.0241546	0.0177134		106.661	0.0361031	106.661	0.187713	106.661	0.344155	106.815	0.479662	106.661	0.631272	106.661	0.790934	106.661	0.944155	106.661	1.08771
	0.0128824	0.0177134	0.0128824	0.0128824	0.0289855	0.0144928	0.0257649	0.00966184		105.885	0.0328824	105.885	0.187713	105.885	0.332882	106.039	0.482882	105.885	0.648986	105.885	0.784493	105.885	0.945765	105.885	1.07966
	0.0144928	0.0161031	0.0112721	0.0112721	0.0112721	0.0354267	0.0144928	0.0193237		105.11	0.0344928	105.11	0.186103	105.11	0.331272	105.264	0.481272	105.11	0.631272	105.11	0.805427	105.11	0.934493	105.11	1.08932
	0.0128824	0.0161031	0.0177134	0.00966184	0.0161031	0.0289855	0.00805153	0.0112721		104.334	0.0328824	104.334	0.186103	104.334	0.337713	104.488	0.479662	104.334	0.636103	104.334	0.798986	104.334	0.928052	104.334	1.08127
	0.020934	0.0144928	0.0128824	0.0144928	0.0177134	0.0241546	0.020934	0.0112721		103.559	0.040934	103.559	0.184493	103.559	0.332882	103.713	0.484493	103.559	0.637713	103.559	0.794155	103.559	0.940934	103.559	1.08127
	0.0193237	0.0144928	0.00966184	0.00805153	0.0128824	0.0241546	0.0257649	0.0177134		102.783	0.0393237	102.783	0.184493	102.783	0.329662	102.937	0.478052	102.783	0.632882	102.783	0.794155	102.783	0.945765	102.783	1.08771
	0.00644122	0.0144928	0.0112721	0.0144928	0.0193237	0.0161031	0.00966184	0.0128824		102.008	0.0264412	102.008	0.184493	102.008	0.331272	102.162	0.484493	102.008	0.639324	102.008	0.786103	102.008	0.929662	102.008	1.08288
	0.0144928	0.0161031	0.00805153	0.00805153	0.0128824	0.0241546	0.0161031	0.0161031		101.232	0.0344928	101.232	0.186103	101.232	0.328052	101.387	0.478052	101.232	0.632882	101.232	0.794155	101.232	0.936103	101.232	1.0861
	0.00644122	0.0112721	0.0161031	0.00644122	0.020934	0.0273752	0.0161031	0.0161031		100.457	0.0264412	100.457	0.181272	100.457	0.336103	100.611	0.476441	100.457	0.640934	100.457	0.797375	100.457	0.936103	100.457	1.0861
	0.00805153	0.0128824	0.0144928	0.00966184	0.0177134	0.0257649	0.0193237	0.00644122		99.6812	0.0280515	99.6812	0.182882	99.6812	0.334493	99.8355	0.479662	99.6812	0.637713	99.6812	0.795765	99.6812	0.939324	99.6812	1.07644
	0.00644122	0.0112721	0.0241546	0.00805153	0.0112721	0.0241546	0.020934	0.0144928		98.9057	0.0264412	98.9057	0.181272	98.9057	0.344155	99.06	0.478052	98.9057	0.631272	98.9057	0.794155	98.9057	0.940934	98.9057	1.08449
	0.00805153	0.00966184	0.0225443	0.0144928	0.0144928	0.0161031	0.0177134	0.0128824		98.1301	0.0280515	98.1301	0.179662	98.1301	0.342544	98.2845	0.484493	98.1301	0.634493	98.1301	0.786103	98.1301	0.937713	98.1301	1.08288
	0.0112721	0.0144928	0.0193237	0.00644122	0.0144928	0.0128824	0.0161031	0.0144928		97.3546	0.0312721	97.3546	0.184493	97.3546	0.339324	97.509	0.476441	97.3546	0.634493	97.3546	0.782882	97.3546	0.936103	97.3546	1.08449
	0.00966184	0.0128824	0.00966184	0.00805153	0.0144928	0.020934	0.0177134	0.00483092		96.5791	0.0296618	96.5791	0.182882	96.5791	0.329662	96.7335	0.478052	96.5791	0.634493	96.5791	0.790934	96.5791	0.937713	96.5791	1.07483
	0.0112721	0.0144928	0.0112721	0.00483092	0.0305958	0.0128824	0.0225443	0.00966184		95.8036	0.0312721	95.8036	0.184493	95.8036	0.331272	95.9581	0.474831	95.8036	0.650596	95.8036	0.782882	95.8036	0.942544	95.8036	1.07966
	0.0128824	0.0128824	0.00644122	0.0144928	0.00805153	0.0177134	0.0144928	0.00644122		95.0281	0.0328824	95.0281	0.182882	95.0281	0.326441	95.1826	0.484493	95.0281	0.628052	95.0281	0.787713	95.0281	0.934493	95.0281	1.07644
	0.0144928	0.00966184	0	0	0.0112721	0.0161031	0.0177134	0.0112721		94.2526	0.0344928	94.2526	0.179662	94.2526	0.32	94.4071	0.47	94.2526	0.631272	94.2526	0.786103	94.2526	0.937713	94.2526	1.08127
	0.00805153	0.0112721	0.00644122	0.0128824	0.00966184	0.020934	0.0144928	0.00805153		93.4771	0.0280515	93.4771	0.181272	93.4771	0.326441	93.6316	0.482882	93.4771	0.629662	93.4771	0.790934	93.4771	0.934493	93.4771	1.07805
	0.00483092	0.00644122	0.0161031	0.00966184	0.020934	0.0177134	0.0144928	0.00805153		92.7016	0.0248309	92.7016	0.176441	92.7016	0.336103	92.8561	0.479662	92.7016	0.640934	92.7016	0.787713	92.7016	0.934493	92.7016	1.07805
	0.00644122	0.0112721	0.0128824	0.00644122	0.0177134	0.0338164	0.0112721	0.00966184		91.9261	0.0264412	91.9261	0.181272	91.9261	0.332882	92.0806	0.476441	91.9261	0.637713	91.9261	0.803816	91.9261	0.931272	91.9261	1.07966
	0.00966184	0.0161031	0.0128824	0	0.00322061	0.00805153	0.0193237	0.0161031		91.1506	0.0296618	91.1506	0.186103	91.1506	0.332882	91.3051	0.47	91.1506	0.623221	91.1506	0.778052	91.1506	0.939324	91.1506	1.0861
	0.00966184	0.0144928	0.0112721	0.0128824	0.00644122	0.0273752	0.0144928	0.00966184		90.3751	0.0296618	90.3751	0.184493	90.3751	0.331272	90.5296	0.482882	90.3751	0.626441	90.3751	0.797375	90.3751	0.934493	90.3751	1.07966
	0.00483092	0.0112721	0.00966184	0.0144928	0.00966184	0.00644122	0.020934	0.00644122		89.5996	0.0248309	89.5996	0.181272	89.5996	0.329662	89.7541	0.484493	89.5996	0.629662	89.5996	0.776441	89.5996	0.940934	89.5996	1.07644
	0.00805153	0.00966184	0.0193237	0.0112721	0.020934	0.0128824	0.0257649	0.0144928		88.8241	0.0280515	88.8241	0.179662	88.8241	0.339324	88.9786	0.481272	88.8241	0.640934	88.8241	0.782882	88.8241	0.945765	88.8241	1.08449
	0.00805153	0.00805153	0.0144928	0.00322061	0	0.020934	0.0144928	0.00966184		88.0486	0.0280515	88.0486	0.178052	88.0486	0.334493	88.2031	0.473221	88.0486	0.62	88.0486	0.790934	88.0486	0.934493	88.0486	1.07966
	0.0161031	0.00644122	0.0128824	0.00644122	0.0128824	0.0273752	0.0161031	0.00966184		87.2731	0.0361031	87.2731	0.176441	87.2731	0.332882	87.4276	0.476441	87.2731	0.632882	87.2731	0.797375	87.2731	0.936103	87.2731	1.07966
	0.0112721	0.0177134	0.0112721	0.00805153	0.00161031	0.020934	0.0161031	0.0144928		86.4976	0.0312721	86.4976	0.187713	86.4976	0.331272	86.6521	0.478052	86.4976	0.62161	86.4976	0.790934	86.4976	0.936103	86.4976	1.08449
	0.00322061	0.00966184	0.0112721	0.00483092	0.0144928	0.0161031	0.0144928	0.00966184		85.7221	0.0232206	85.7221	0.179662	85.7221	0.331272	85.8766	0.474831	85.7221	0.634493	85.7221	0.786103	85.7221	0.934493	85.7221	1.07966
	0.0112721	0.00322061	0.0128824	0.00805153	0.00805153	0.0161031	0.0161031	0.00805153		84.9466	0.0312721	84.9466	0.173221	84.9466	0.332882	85.1011	0.478052	84.9466	0.628052	84.9466	0.786103	84.9466	0.936103	84.9466	1.07805
	0.00322061	0.00161031	0.0161031	0.0112721	0.00161031	0.0193237	0.0193237	0.00966184		84.1711	0.0232206	84.1711	0.17161	84.1711	0.336103	84.3257	0.481272	84.1711	0.62161	84.1711	0.789324	84.1711	0.939324	84.1711	1.07966
	0.00644122	0.0112721	0.0177134	0.00966184	0.00161031	0.0128824	0.020934	0.00483092		83.3956	0.0264412	83.3956	0.181272	83.3956	0.337713	83.5502	0.479662	83.3956	0.62161	83.3956	0.782882	83.3956	0.940934	83.3956	1.07483
	0.00966184	0	0.0112721	0.00483092	0.00644122	0.020934	0.0112721	0.00805153		82.6201	0.0296618	82.6201	0.17	82.6201	0.331272	82.7747	0.474831	82.6201	0.626441	82.6201	0.790934	82.6201	0.931272	82.6201	1.07805
	0.0112721	0.00322061	0.0128824	0.00644122	0.00644122	0.0161031	0.0128824	0.00322061		81.8446	0.0312721	81.8446	0.173221	81.8446	0.332882	81.9992	0.476441	81.8446	0.626441	81.8446	0.786103	81.8446	0.932882	81.8446	1.07322
	0.00483092	0.00805153	0.0257649	0.0128824	0	0.0273752	0.0128824	0.0128824		81.0691	0.0248309	81.0691	0.178052	81.0691	0.345765	81.2237	0.482882	81.0691	0.62	81.0691	0.797375	81.0691	0.932882	81.0691	1.08288
	0.0177134	0.00966184	0.0144928	0.0144928	0.00805153	0.0144928	0.0128824	0.0128824		80.2936	0.0377134	80.2936	0.179662	80.2936	0.334493	80.4482	0.484493	80.2936	0.628052	80.2936	0.784493	80.2936	0.932882	80.2936	1.08288
	0.00805153	0.0112721	0.0112721	0.00805153	0.0112721	0	0.0225443	0.00966184		79.5181	0.0280515	79.5181	0.181272	79.5181	0.331272	79.6727	0.478052	79.5181	0.631272	79.5181	0.77	79.5181	0.942544	79.5181	1.07966
	0.0144928	0.00322061	0.0161031	0.00644122	0.00805153	0.0177134	0.0144928	0.00322061		78.7426	0.0344928	78.7426	0.173221	78.7426	0.336103	78.8972	0.476441	78.7426	0.628052	78.7426	0.787713	78.7426	0.934493	78.7426	1.07322
	0.0112721	0.00322061	0.00483092	0.00805153	0.0128824	0.020934	0.0128824	0		77.9671	0.0312721	77.9671	0.173221	77.9671	0.324831	78.1217	0.478052	77.9671	0.632882	77.9671	0.790934	77.9671	0.932882	77.9671	1.07
	0.00805153	0.0144928	0.00161031	0	0.00644122	0.0112721	0.0177134	0.0144928		77.1916	0.0280515	77.1916	0.184493	77.1916	0.32161	77.3462	0.47	77.1916	0.626441	77.1916	0.781272	77.1916	0.937713	77.1916	1.08449
	0.00805153	0.0144928	0.0273752	0.0193237	0.00805153	0.0128824	0.0225443	0.00805153		76.4161	0.0280515	76.4161	0.184493	76.4161	0.347375	76.5707	0.489324	76.4161	0.628052	76.4161	0.782882	76.4161	0.942544	76.4161	1.07805
	0.0128824	0.0177134	0.00805153	0.0144928	0.00483092	0.0257649	0.0144928	0.0128824		75.6406	0.0328824	75.6406	0.187713	75.6406	0.328052	75.7952	0.484493	75.6406	0.624831	75.6406	0.795765	75.6406	0.934493	75.6406	1.08288
	0.0225443	0.0128824	0.0193237	0.020934	0.0128824	0.0144928	0.0177134	0.0144928		74.8651	0.0425443	74.8651	0.182882	74.8651	0.339324	75.0197	0.490934	74.8651	0.632882	74.8651	0.784493	74.8651	0.937713	74.8651	1.08449
	0.00966184	0.00966184	0.0161031	0.0144928	0.00805153	0	0.0161031	0.0144928		74.0896	0.0296618	74.0896	0.179662	74.0896	0.336103	74.2442	0.484493	74.0896	0.628052	74.0896	0.77	74.0896	0.936103	74.0896	1.08449
	0.0161031	0.0112721	0.0241546	0.0177134	0.00644122	0.0305958	0.0193237	0.00966184		73.3141	0.0361031	73.3141	0.181272	73.3141	0.344155	73.4687	0.487713	73.3141	0.626441	73.3141	0.800596	73.3141	0.939324	73.3141	1.07966
	0.0257649	0.0177134	0.0225443	0.0241546	0.0193237	0.0273752	0.0241546	0.0144928		72.5386	0.0457649	72.5386	0.187713	72.5386	0.342544	72.6933	0.494155	72.5386	0.639324	72.5386	0.797375	72.5386	0.944155	72.5386	1.08449
	0.020934	0.0193237	0.0273752	0.0193237	0.0112721	0.0177134	0.0273752	0.0193237		71.7631	0.040934	71.7631	0.189324	71.7631	0.347375	71.9178	0.489324	71.7631	0.631272	71.7631	0.787713	71.7631	0.947375	71.7631	1.08932
	0.020934	0.0144928	0.0225443	0.0225443	0.0112721	0.0257649	0.020934	0.020934		70.9876	0.040934	70.9876	0.184493	70.9876	0.342544	71.1423	0.492544	70.9876	0.631272	70.9876	0.795765	70.9876	0.940934	70.9876	1.09093
	0.0257649	0.0193237	0.0305958	0.0354267	0.0128824	0.0322061	0.0305958	0.0289855		70.2121	0.0457649	70.2121	0.189324	70.2121	0.350596	70.3668	0.505427	70.2121	0.632882	70.2121	0.802206	70.2121	0.950596	70.2121	1.09899
	0.0354267	0.0289855	0.0450886	0.0338164	0.0273752	0.0322061	0.0466989	0.037037		69.4366	0.0554267	69.4366	0.198986	69.4366	0.365089	69.5913	0.503816	69.4366	0.647375	69.4366	0.802206	69.4366	0.966699	69.4366	1.10704
	0.0483092	0.0450886	0.0450886	0.0499195	0.0466989	0.0563607	0.0563607	0.0434783		68.6611	0.0683092	68.6611	0.215089	68.6611	0.365089	68.8158	0.519919	68.6611	0.666699	68.6611	0.826361	68.6611	0.976361	68.6611	1.11348
	0.0611916	0.0628019	0.0628019	0.0676329	0.0499195	0.0628019	0.0692432	0.0644122		67.8856	0.0811916	67.8856	0.232802	67.8856	0.382802	68.0403	0.537633	67.8856	0.669919	67.8856	0.832802	67.8856	0.989243	67.8856	1.13441
	0.0740741	0.0821256	0.078905	0.0772947	0.0676329	0.0837359	0.0966184	0.0837359		67.1101	0.0940741	67.1101	0.252126	67.1101	0.398905	67.2648	0.547295	67.1101	0.687633	67.1101	0.853736	67.1101	1.01662	67.1101	1.15374
	0.10306	0.0982287	0.109501	0.115942	0.0966184	0.10628	0.125604	0.10789		66.3346	0.12306	66.3346	0.268229	66.3346	0.429501	66.4893	0.585942	66.3346	0.716618	66.3346	0.87628	66.3346	1.0456	66.3346	1.17789
	0.130435	0.148148	0.149758	0.143317	0.130435	0.154589	0.169082	0.141707		65.5591	0.150435	65.5591	0.318148	65.5591	0.469758	65.7138	0.613317	65.5591	0.750435	65.5591	0.924589	65.5591	1.08908	65.5591	1.21171
	0.165862	0.172303	0.185185	0.173913	0.152979	0.193237	0.196457	0.173913		64.7836	0.185862	64.7836	0.342303	64.7836	0.505185	64.9383	0.643913	64.7836	0.772979	64.7836	0.963237	64.7836	1.11646	64.7836	1.24391
	0.180354	0.201288	0.191626	0.194847	0.177134	0.204509	0.199678	0.198068		64.0081	0.200354	64.0081	0.371288	64.0081	0.511626	64.1628	0.664847	64.0081	0.797134	64.0081	0.974509	64.0081	1.11968	64.0081	1.26807
	0.196457	0.21095	0.227053	0.207729	0.172303	0.196457	0.199678	0.206119		63.2326	0.216457	63.2326	0.38095	63.2326	0.547053	63.3873	0.677729	63.2326	0.792303	63.2326	0.966457	63.2326	1.11968	63.2326	1.27612
	0.215781	0.220612	0.214171	0.202899	0.186795	0.20934	0.194847	0.222222		62.4571	0.235781	62.4571	0.390612	62.4571	0.534171	62.6118	0.672899	62.4571	0.806795	62.4571	0.97934	62.4571	1.11485	62.4571	1.29222
	0.228663	0.235105	0.238325	0.227053	0.188406	0.204509	0.198068	0.235105		61.6816	0.248663	61.6816	0.405105	61.6816	0.558325	61.8363	0.697053	61.6816	0.808406	61.6816	0.974509	61.6816	1.11807	61.6816	1.3051
	0.252818	0.259259	0.270531	0.235105	0.201288	0.196457	0.186795	0.26409		60.9061	0.272818	60.9061	0.429259	60.9061	0.590531	61.0609	0.705105	60.9061	0.821288	60.9061	0.966457	60.9061	1.1068	60.9061	1.33409
	0.231884	0.228663	0.247987	0.21095	0.178744	0.196457	0.186795	0.235105		60.1306	0.251884	60.1306	0.398663	60.1306	0.567987	60.2854	0.68095	60.1306	0.798744	60.1306	0.966457	60.1306	1.1068	60.1306	1.3051
	0.235105	0.233494	0.267311	0.217391	0.194847	0.202899	0.206119	0.239936		59.3551	0.255105	59.3551	0.403494	59.3551	0.587311	59.5099	0.687391	59.3551	0.814847	59.3551	0.972899	59.3551	1.12612	59.3551	1.30994
	0.26087	0.26409	0.365539	0.249597	0.217391	0.21256	0.225443	0.272142		58.5796	0.28087	58.5796	0.43409	58.5796	0.685539	58.7344	0.719597	58.5796	0.837391	58.5796	0.98256	58.5796	1.14544	58.5796	1.34214
	0.281804	0.301127	0.400966	0.276973	0.243156	0.267311	0.26248	0.296296		57.8041	0.301804	57.8041	0.471127	57.8041	0.720966	57.9589	0.746973	57.8041	0.863156	57.8041	1.03731	57.8041	1.18248	57.8041	1.3663
	0.323671	0.341385	0.384863	0.326892	0.294686	0.31562	0.31723	0.336554		57.0286	0.343671	57.0286	0.511385	57.0286	0.704863	57.1834	0.796892	57.0286	0.914686	57.0286	1.08562	57.0286	1.23723	57.0286	1.40655
	0.347826	0.389694	0.396135	0.375201	0.342995	0.371981	0.37037	0.376812		56.2531	0.367826	56.2531	0.559694	56.2531	0.716135	56.4079	0.845201	56.2531	0.962995	56.2531	1.14198	56.2531	1.29037	56.2531	1.44681
	0.384863	0.412238	0.417069	0.392915	0.359098	0.405797	0.404187	0.407407		55.4776	0.404863	55.4776	0.582238	55.4776	0.737069	55.6324	0.862915	55.4776	0.979098	55.4776	1.1758	55.4776	1.32419	55.4776	1.47741
	0.373591	0.407407	0.400966	0.396135	0.375201	0.400966	0.399356	0.400966		54.702	0.393591	54.702	0.577407	54.702	0.720966	54.8569	0.866135	54.702	0.995201	54.702	1.17097	54.702	1.31936	54.702	1.47097
	0.363929	0.392915	0.386473	0.373591	0.347826	0.359098	0.371981	0.389694		53.9265	0.383929	53.9265	0.562915	53.9265	0.706473	54.0814	0.843591	53.9265	0.967826	53.9265	1.1291	53.9265	1.29198	53.9265	1.45969
	0.383253	0.388084	0.380032	0.371981	0.328502	0.352657	0.349436	0.399356		53.151	0.403253	53.151	0.558084	53.151	0.700032	53.3059	0.841981	53.151	0.948502	53.151	1.12266	53.151	1.26944	53.151	1.46936
	0.438003	0.452496	0.429952	0.42351	0.371981	0.36876	0.36715	0.449275		52.3755	0.458003	52.3755	0.622496	52.3755	0.749952	52.5304	0.89351	52.3755	0.991981	52.3755	1.13876	52.3755	1.28715	52.3755	1.51928
	0.504026	0.547504	0.518519	0.497585	0.442834	0.433172	0.434783	0.541063		51.6	0.524026	51.6	0.717504	51.6	0.838519	51.7549	0.967585	51.6	1.06283	51.6	1.20317	51.6	1.35478	51.6	1.61106
	0.563607	0.623188	0.592593	0.57971	0.534622	0.566828	0.561997	0.621578		50.8245	0.583607	50.8245	0.793188	50.8245	0.912593	50.9794	1.04971	50.8245	1.15462	50.8245	1.33683	50.8245	1.482	50.8245	1.69158
	0.634461	0.723027	0.711755	0.697262	0.68277	0.764895	0.747182	0.710145		50.049	0.654461	50.049	0.893027	50.049	1.03176	50.2039	1.16726	50.049	1.30277	50.049	1.5349	50.049	1.66718	50.049	1.78014
	0.605475	0.713366	0.681159	0.674718	0.681159	0.768116	0.745572	0.705314		49.2735	0.625475	49.2735	0.883366	49.2735	1.00116	49.4285	1.14472	49.2735	1.30116	49.2735	1.53812	49.2735	1.66557	49.2735	1.77531
	0.486312	0.552335	0.515298	0.510467	0.521739	0.558776	0.549114	0.555556		48.498	0.506312	48.498	0.722335	48.498	0.835298	48.653	0.980467	48.498	1.14174	48.498	1.32878	48.498	1.46911	48.498	1.62556
	0.373591	0.413849	0.386473	0.381643	0.380032	0.392915	0.394525	0.439614		47.7225	0.393591	47.7225	0.583849	47.7225	0.706473	47.8775	0.851643	47.7225	1.00003	47.7225	1.16291	47.7225	1.31452	47.7225	1.50961
	0.359098	0.371981	0.334944	0.346216	0.336554	0.339775	0.354267	0.410628		46.947	0.379098	46.947	0.541981	46.947	0.654944	47.102	0.816216	46.947	0.956554	46.947	1.10977	46.947	1.27427	46.947	1.48063
	0.413849	0.439614	0.417069	0.417069	0.388084	0.404187	0.410628	0.468599		46.1715	0.433849	46.1715	0.609614	46.1715	0.737069	46.3265	0.887069	46.1715	1.00808	46.1715	1.17419	46.1715	1.33063	46.1715	1.5386
	0.552335	0.589372	0.586151	0.571659	0.515298	0.539452	0.555556	0.619968		45.396	0.572335	45.396	0.759372	45.396	0.906151	45.551	1.04166	45.396	1.1353	45.396	1.30945	45.396	1.47556	45.396	1.68997
	0.726248	0.811594	0.78744	0.779388	0.703704	0.743961	0.740741	0.819646		44.6205	0.746248	44.6205	0.981594	44.6205	1.10744	44.7755	1.24939	44.6205	1.3237	44.6205	1.51396	44.6205	1.66074	44.6205	1.88965
	0.847021	0.991948	0.969404	0.940419	0.89372	0.950081	0.933977	0.969404		43.845	0.867021	43.845	1.16195	43.845	1.2894	44	1.41042	43.845	1.51372	43.845	1.72008	43.845	1.85398	43.845	2.0394
	0.813205	0.972625	0.938808	0.89694	0.898551	0.993559	0.94847	0.932367		43.0695	0.833205	43.0695	1.14262	43.0695	1.25881	43.2245	1.36694	43.0695	1.51855	43.0695	1.76356	43.0695	1.86847	43.0695	2.00237
	0.665056	0.803543	0.756844	0.714976	0.742351	0.819646	0.753623	0.745572		42.294	0.685056	42.294	0.973543	42.294	1.07684	42.449	1.18498	42.294	1.36235	42.294	1.58965	42.294	1.67362	42.294	1.81557
	0.500805	0.600644	0.549114	0.518519	0.558776	0.594203	0.536232	0.552335		41.5185	0.520805	41.5185	0.770644	41.5185	0.869114	41.6735	0.988519	41.5185	1.17878	41.5185	1.3642	41.5185	1.45623	41.5185	1.62233
	0.362319	0.433172	0.405797	0.37037	0.412238	0.425121	0.384863	0.404187		40.743	0.382319	40.743	0.603172	40.743	0.725797	40.898	0.84037	40.743	1.03224	40.743	1.19512	40.743	1.30486	40.743	1.47419
	0.283414	0.330113	0.305958	0.275362	0.312399	0.320451	0.285024	0.307568		39.9675	0.303414	39.9675	0.500113	39.9675	0.625958	40.1225	0.745362	39.9675	0.932399	39.9675	1.09045	39.9675	1.20502	39.9675	1.37757
	0.233494	0.268921	0.244767	0.227053	0.256039	0.254428	0.228663	0.256039		39.192	0.253494	39.192	0.438921	39.192	0.564767	39.347	0.697053	39.192	0.876039	39.192	1.02443	39.192	1.14866	39.192	1.32604
	0.206119	0.249597	0.214171	0.199678	0.227053	0.228663	0.206119	0.230274		38.4165	0.226119	38.4165	0.419597	38.4165	0.534171	38.5715	0.669678	38.4165	0.847053	38.4165	0.998663	38.4165	1.12612	38.4165	1.30027
	0.188406	0.217391	0.190016	0.178744	0.201288	0.204509	0.177134	0.202899		37.641	0.208406	37.641	0.387391	37.641	0.510016	37.7961	0.648744	37.641	0.821288	37.641	0.974509	37.641	1.09713	37.641	1.2729
	0.169082	0.198068	0.175523	0.165862	0.188406	0.193237	0.15781	0.188406		36.8655	0.189082	36.8655	0.368068	36.8655	0.495523	37.0206	0.635862	36.8655	0.808406	36.8655	0.963237	36.8655	1.07781	36.8655	1.25841
	0.151369	0.173913	0.1562	0.143317	0.164251	0.161031	0.140097	0.164251		36.09	0.171369	36.09	0.343913	36.09	0.4762	36.2451	0.613317	36.09	0.784251	36.09	0.931031	36.09	1.0601	36.09	1.23425
	0.119163	0.151369	0.136876	0.125604	0.136876	0.136876	0.128824	0.140097		35.3145	0.139163	35.3145	0.321369	35.3145	0.456876	35.4696	0.595604	35.3145	0.756876	35.3145	0.906876	35.3145	1.04882	35.3145	1.2101
	0.111111	0.140097	0.125604	0.114332	0.130435	0.133655	0.114332	0.135266		34.539	0.131111	34.539	0.310097	34.539	0.445604	34.6941	0.584332	34.539	0.750435	34.539	0.903655	34.539	1.03433	34.539	1.20527
	0.119163	0.122383	0.122383	0.10467	0.119163	0.122383	0.114332	0.122383		33.7635	0.139163	33.7635	0.292383	33.7635	0.442383	33.9186	0.57467	33.7635	0.739163	33.7635	0.892383	33.7635	1.03433	33.7635	1.19238
	0.10467	0.123994	0.10628	0.0966184	0.112721	0.099839	0.10628	0.112721		32.988	0.12467	32.988	0.293994	32.988	0.42628	33.1431	0.566618	32.988	0.732721	32.988	0.869839	32.988	1.02628	32.988	1.18272
	0.0950081	0.111111	0.0950081	0.0901771	0.099839	0.10467	0.0885668	0.101449		32.2125	0.115008	32.2125	0.281111	32.2125	0.415008	32.3676	0.560177	32.2125	0.719839	32.2125	0.87467	32.2125	1.00857	32.2125	1.17145
	0.099839	0.114332	0.10467	0.078905	0.112721	0.10628	0.0901771	0.10306		31.437	0.119839	31.437	0.284332	31.437	0.42467	31.5921	0.548905	31.437	0.732721	31.437	0.87628	31.437	1.01018	31.437	1.17306
	0.0869565	0.109501	0.0853462	0.0885668	0.10306	0.109501	0.0837359	0.101449		30.6615	0.106957	30.6615	0.279501	30.6615	0.405346	30.8166	0.558567	30.6615	0.72306	30.6615	0.879501	30.6615	1.00374	30.6615	1.17145
	0.078905	0.10789	0.099839	0.0853462	0.0966184	0.0966184	0.0821256	0.0950081		29.886	0.098905	29.886	0.27789	29.886	0.419839	30.0411	0.555346	29.886	0.716618	29.886	0.866618	29.886	1.00213	29.886	1.16501
	0.0772947	0.101449	0.0869565	0.0772947	0.0966184	0.0982287	0.078905	0.0901771		29.1105	0.0972947	29.1105	0.271449	29.1105	0.406957	29.2656	0.547295	29.1105	0.716618	29.1105	0.868229	29.1105	0.998905	29.1105	1.16018
	0.0772947	0.0933977	0.0724638	0.078905	0.0901771	0.0821256	0.0772947	0.0853462		28.335	0.0972947	28.335	0.263398	28.335	0.392464	28.4901	0.548905	28.335	0.710177	28.335	0.852126	28.335	0.997295	28.335	1.15535
	0.0724638	0.0885668	0.078905	0.0724638	0.0821256	0.0885668	0.0724638	0.0821256		27.5595	0.0924638	27.5595	0.258567	27.5595	0.398905	27.7146	0.542464	27.5595	0.702126	27.5595	0.858567	27.5595	0.992464	27.5595	1.15213
	0.0853462	0.0885668	0.0821256	0.0756844	0.0821256	0.0805153	0.0724638	0.0805153		26.784	0.105346	26.784	0.258567	26.784	0.402126	26.9391	0.545684	26.784	0.702126	26.784	0.850515	26.784	0.992464	26.784	1.15052
	0.0885668	0.0966184	0.0805153	0.0901771	0.0901771	0.0853462	0.0933977	0.0966184		26.0085	0.108567	26.0085	0.266618	26.0085	0.400515	26.1637	0.560177	26.0085	0.710177	26.0085	0.855346	26.0085	1.0134	26.0085	1.16662
	0.10467	0.115942	0.112721	0.109501	0.117552	0.117552	0.120773	0.112721		25.233	0.12467	25.233	0.285942	25.233	0.432721	25.3882	0.579501	25.233	0.737552	25.233	0.887552	25.233	1.04077	25.233	1.18272
	0.141707	0.144928	0.141707	0.148148	0.146538	0.161031	0.161031	0.143317		24.4575	0.161707	24.4575	0.314928	24.4575	0.461707	24.6127	0.618148	24.4575	0.766538	24.4575	0.931031	24.4575	1.08103	24.4575	1.21332
	0.181965	0.196457	0.21256	0.21095	0.21095	0.231884	0.238325	0.204509		23.682	0.201965	23.682	0.366457	23.682	0.53256	23.8372	0.68095	23.682	0.83095	23.682	1.00188	23.682	1.15833	23.682	1.27451
	0.244767	0.26087	0.276973	0.285024	0.280193	0.322061	0.31562	0.270531		22.9065	0.264767	22.9065	0.43087	22.9065	0.596973	23.0617	0.755024	22.9065	0.900193	22.9065	1.09206	22.9065	1.23562	22.9065	1.34053
	0.318841	0.339775	0.37037	0.359098	0.362319	0.402576	0.400966	0.346216		22.131	0.338841	22.131	0.509775	22.131	0.69037	22.2862	0.829098	22.131	0.982319	22.131	1.17258	22.131	1.32097	22.131	1.41622
	0.409018	0.439614	0.470209	0.449275	0.460548	0.502415	0.497585	0.447665		21.3555	0.429018	21.3555	0.609614	21.3555	0.790209	21.5107	0.919275	21.3555	1.08055	21.3555	1.27242	21.3555	1.41758	21.3555	1.51767
	0.483092	0.52496	0.547504	0.536232	0.555556	0.600644	0.589372	0.521739		20.58	0.503092	20.58	0.69496	20.58	0.867504	20.7352	1.00623	20.58	1.17556	20.58	1.37064	20.58	1.50937	20.58	1.59174
	0.466989	0.510467	0.536232	0.499195	0.537842	0.557166	0.52657	0.508857		19.8045	0.486989	19.8045	0.680467	19.8045	0.856232	19.9597	0.969195	19.8045	1.15784	19.8045	1.32717	19.8045	1.44657	19.8045	1.57886
	0.441224	0.47182	0.505636	0.442834	0.452496	0.449275	0.426731	0.47182		19.029	0.461224	19.029	0.64182	19.029	0.825636	19.1842	0.912834	19.029	1.0725	19.029	1.21928	19.029	1.34673	19.029	1.54182
	0.450886	0.47343	0.610306	0.449275	0.431562	0.402576	0.384863	0.47343		18.2535	0.470886	18.2535	0.64343	18.2535	0.930306	18.4087	0.919275	18.2535	1.05156	18.2535	1.17258	18.2535	1.30486	18.2535	1.54343
	0.537842	0.570048	0.587762	0.516908	0.470209	0.4219	0.363929	0.558776		17.478	0.557842	17.478	0.740048	17.478	0.907762	17.6332	0.986908	17.478	1.09021	17.478	1.1919	17.478	1.28393	17.478	1.62878
	0.465378	0.508857	0.491143	0.436393	0.426731	0.383253	0.339775	0.47343		16.7025	0.485378	16.7025	0.678857	16.7025	0.811143	16.8577	0.906393	16.7025	1.04673	16.7025	1.15325	16.7025	1.25977	16.7025	1.54343
	0.349436	0.381643	0.352657	0.334944	0.334944	0.31562	0.283414	0.362319		15.927	0.369436	15.927	0.551643	15.927	0.672657	16.0822	0.804944	15.927	0.954944	15.927	1.08562	15.927	1.20341	15.927	1.43232
	0.223833	0.254428	0.235105	0.220612	0.236715	0.214171	0.201288	0.247987		15.1515	0.243833	15.1515	0.424428	15.1515	0.555105	15.3067	0.690612	15.1515	0.856715	15.1515	0.984171	15.1515	1.12129	15.1515	1.31799
	0.128824	0.161031	0.127214	0.128824	0.152979	0.143317	0.127214	0.148148		14.376	0.148824	14.376	0.331031	14.376	0.447214	14.5313	0.598824	14.376	0.772979	14.376	0.913317	14.376	1.04721	14.376	1.21815
	0.0724638	0.0933977	0.0756844	0.0692432	0.10628	0.0917874	0.078905	0.0837359		13.6005	0.0924638	13.6005	0.263398	13.6005	0.395684	13.7558	0.539243	13.6005	0.72628	13.6005	0.861787	13.6005	0.998905	13.6005	1.15374
	0.0483092	0.0772947	0.0450886	0.0402576	0.0869565	0.0692432	0.041868	0.0628019		12.825	0.0683092	12.825	0.247295	12.825	0.365089	12.9803	0.510258	12.825	0.706957	12.825	0.839243	12.825	0.961868	12.825	1.1328
	0.0450886	0.0692432	0.0338164	0.0466989	0.0595813	0.057971	0.0386473	0.0434783		12.0495	0.0650886	12.0495	0.239243	12.0495	0.353816	12.2048	0.516699	12.0495	0.679581	12.0495	0.827971	12.0495	0.958647	12.0495	1.11348
	0.0273752	0.0434783	0.0434783	0.0322061	0.0595813	0.0499195	0.0289855	0.0354267		11.274	0.0473752	11.274	0.213478	11.274	0.363478	11.4293	0.502206	11.274	0.679581	11.274	0.819919	11.274	0.948986	11.274	1.10543
	0.0225443	0.0338164	0.0305958	0.0225443	0.0386473	0.0354267	0.020934	0.0289855		10.4984	0.0425443	10.4984	0.203816	10.4984	0.350596	10.6538	0.492544	10.4984	0.658647	10.4984	0.805427	10.4984	0.940934	10.4984	1.09899
	0.0241546	0.0322061	0.0225443	0.00483092	0.0402576	0.0338164	0.0144928	0.0193237		9.72295	0.0441546	9.72295	0.202206	9.72295	0.342544	9.87829	0.474831	9.72295	0.660258	9.72295	0.803816	9.72295	0.934493	9.72295	1.08932
	0.0128824	0.0289855	0.00966184	0.00644122	0.0289855	0.0322061	0.0144928	0.0161031		8.94745	0.0328824	8.94745	0.198986	8.94745	0.329662	9.1028	0.476441	8.94745	0.648986	8.94745	0.802206	8.94745	0.934493	8.94745	1.0861
	0.00483092	0.0257649	0.0193237	0.0112721	0.0305958	0.0241546	0.0128824	0.0112721		8.17194	0.0248309	8.17194	0.195765	8.17194	0.339324	8.32731	0.481272	8.17194	0.650596	8.17194	0.794155	8.17194	0.932882	8.17194	1.08127
	0.0161031	0.0241546	0.00483092	0.0144928	0.0241546	0.0305958	0.0128824	0.00966184		7.39644	0.0361031	7.39644	0.194155	7.39644	0.324831	7.55181	0.484493	7.39644	0.644155	7.39644	0.800596	7.39644	0.932882	7.39644	1.07966
	0.00161031	0.0177134	0.0128824	0.00161031	0.0338164	0.0386473	0.0128824	0.0112721		6.62094	0.0216103	6.62094	0.187713	6.62094	0.332882	6.77632	0.47161	6.62094	0.653816	6.62094	0.808647	6.62094	0.932882	6.62094	1.08127
	0.00966184	0.0193237	0.0144928	0.00966184	0.0338164	0.0128824	0.0144928	0.00805153		5.84544	0.0296618	5.84544	0.189324	5.84544	0.334493	6.00083	0.479662	5.84544	0.653816	5.84544	0.782882	5.84544	0.934493	5.84544	1.07805
	0.0161031	0.0273752	0.00644122	0.00805153	0.0257649	0.0144928	0.0112721	0.00966184		5.06994	0.0361031	5.06994	0.197375	5.06994	0.326441	5.22533	0.478052	5.06994	0.645765	5.06994	0.784493	5.06994	0.931272	5.06994	1.07966
	0.00483092	0.0161031	0.0112721	0.00483092	0.0273752	0.0161031	0.0112721	0.00483092		4.29443	0.0248309	4.29443	0.186103	4.29443	0.331272	4.44984	0.474831	4.29443	0.647375	4.29443	0.786103	4.29443	0.931272	4.29443	1.07483
	0.00966184	0.0225443	0.0112721	0.0112721	0.0225443	0.0241546	0.00161031	0.00644122		3.51893	0.0296618	3.51893	0.192544	3.51893	0.331272	3.67435	0.481272	3.51893	0.642544	3.51893	0.794155	3.51893	0.92161	3.51893	1.07644
	0	0.0177134	0.0128824	0.00644122	0.0338164	0.020934	0.0193237	0.00644122		2.74343	0.02	2.74343	0.187713	2.74343	0.332882	2.89885	0.476441	2.74343	0.653816	2.74343	0.790934	2.74343	0.939324	2.74343	1.07644
	0.00966184	0.0161031	0.0128824	0.00161031	0.0193237	0.0289855	0.0144928	0.00644122		1.96793	0.0296618	1.96793	0.186103	1.96793	0.332882	2.12336	0.47161	1.96793	0.639324	1.96793	0.798986	1.96793	0.934493	1.96793	1.07644
	0.00322061	0.0144928	0.00966184	0.0128824	0.0257649	0.0322061	0.00161031	0.00966184		1.19243	0.0232206	1.19243	0.184493	1.19243	0.329662	1.34787	0.482882	1.19243	0.645765	1.19243	0.802206	1.19243	0.92161	1.19243	1.07966
	0.00644122	0.0225443	0.0112721	0.00805153	0.0338164	0.0241546	0.00805153	0.00805153		0.416926	0.0264412	0.416926	0.192544	0.416926	0.331272	0.572373	0.478052	0.416926	0.653816	0.416926	0.794155	0.416926	0.928052	0.416926	1.07805
											+0.02		+0.17		+0.32		+0.47		+0.62		+0.77		+0.92		+1.07
