# Supplementary material for: The influence of thermal treatments on the secondary structure of silk fibroin scaffolds and their interaction with fibroblasts
Source: PeerJ journal article supplement (doi:10.7717/peerj-matsci.8), 2020-09-01
Supplement: raw_date_of_Figure_for_the_review_#4.xlsx [file raw_date_of_Figure_for_the_review_%234.xlsx]

## Sheet: Sheet1
Wavelength (cm-1)	DH	AC
1299.79	0.0604138	0.0558758
1300.75	0.0603355	0.0558478
1301.72	0.0602748	0.0558091
1302.68	0.0602402	0.0557758
1303.64	0.0602325	0.0557648
1304.61	0.0602487	0.0557869
1305.57	0.0602843	0.05584
1306.54	0.0603326	0.0559054
1307.5	0.0603823	0.0559535
1308.46	0.0604185	0.0559559
1309.43	0.0604296	0.0558997
1310.39	0.0604139	0.0557931
1311.36	0.0603827	0.0556623
1312.32	0.0603553	0.0555397
1313.29	0.0603488	0.0554518
1314.25	0.0603702	0.0554123
1315.21	0.060417	0.0554252
1316.18	0.0604852	0.0554916
1317.14	0.0605775	0.055613
1318.11	0.0607052	0.0557889
1319.07	0.0608824	0.0560127
1320.04	0.0611187	0.0562721
1321	0.0614166	0.0565565
1321.96	0.0617776	0.0568639
1322.93	0.0622097	0.0572012
1323.89	0.0627302	0.0575769
1324.86	0.0633607	0.0579943
1325.82	0.0641167	0.0584485
1326.79	0.0649984	0.0589305
1327.75	0.0659861	0.059432
1328.71	0.0670423	0.059946
1329.68	0.0681154	0.0604612
1330.64	0.0691446	0.0609551
1331.61	0.0700659	0.061395
1332.57	0.070822	0.0617465
1333.53	0.071369	0.0619849
1334.5	0.0716769	0.0621004
1335.46	0.0717206	0.062094
1336.43	0.0714727	0.0619727
1337.39	0.0709139	0.061752
1338.36	0.0700679	0.0614638
1339.32	0.0690325	0.0611574
1340.28	0.0679579	0.0608793
1341.25	0.066969	0.0606461
1342.21	0.0661125	0.060442
1343.18	0.0653707	0.0602391
1344.14	0.0647038	0.0600175
1345.11	0.0640777	0.0597735
1346.07	0.0634735	0.0595195
1347.03	0.0628881	0.0592774
1348	0.0623339	0.0590717
1348.96	0.0618369	0.0589216
1349.93	0.0614291	0.0588375
1350.89	0.0611354	0.0588208
1351.86	0.060962	0.0588678
1352.82	0.0608934	0.0589746
1353.78	0.0608995	0.0591407
1354.75	0.0609484	0.0593673
1355.71	0.061019	0.0596517
1356.68	0.0611083	0.0599859
1357.64	0.0612315	0.0603672
1358.61	0.0614212	0.0608165
1359.57	0.0617248	0.0613918
1360.53	0.0621922	0.0621787
1361.5	0.0628423	0.0632359
1362.46	0.0636266	0.0645166
1363.43	0.064445	0.0658564
1364.39	0.0652226	0.0670771
1365.35	0.0659592	0.0680879
1366.32	0.0667044	0.0688873
1367.28	0.0675003	0.069509
1368.25	0.0683431	0.0699839
1369.21	0.0691824	0.070332
1370.18	0.0699591	0.0705713
1371.14	0.0706503	0.070726
1372.1	0.0712855	0.070827
1373.07	0.0719209	0.0709065
1374.03	0.0725883	0.0709903
1375	0.0732597	0.0710898
1375.96	0.0738694	0.0712025
1376.93	0.0743726	0.0713213
1377.89	0.0747747	0.0714464
1378.85	0.0751128	0.0715861
1379.82	0.0754239	0.0717506
1380.78	0.0757255	0.071941
1381.75	0.0760164	0.0721456
1382.71	0.0762897	0.0723442
1383.67	0.0765422	0.0725199
1384.64	0.0767703	0.0726664
1385.6	0.0769547	0.0727903
1386.57	0.0770512	0.0729052
1387.53	0.0770094	0.0730201
1388.5	0.0768118	0.0731297
1389.46	0.0764819	0.0732192
1390.42	0.0760539	0.0732761
1391.39	0.0755476	0.073297
1392.35	0.0749723	0.073289
1393.32	0.0743499	0.073272
1394.28	0.0737381	0.0732819
1395.25	0.0732299	0.0733674
1396.21	0.0729122	0.0735753
1397.17	0.0728103	0.0739271
1398.14	0.0728761	0.0744071
1399.1	0.0730265	0.0749695
1400.07	0.0731949	0.0755611
1401.03	0.0733598	0.0761449
1402	0.0735468	0.0767088
1402.96	0.0738086	0.0772566
1403.92	0.0741923	0.0777874
1404.89	0.0746992	0.0782783
1405.85	0.075266	0.0786869
1406.82	0.0757967	0.0789747
1407.78	0.0762177	0.0791249
1408.75	0.0764958	0.0791334
1409.71	0.0766164	0.0789948
1410.67	0.0765626	0.0787046
1411.64	0.0763235	0.0782796
1412.6	0.0759166	0.0777671
1413.57	0.0753822	0.0772239
1414.53	0.0747471	0.0766827
1415.49	0.073986	0.0761399
1416.46	0.0730169	0.075568
1417.42	0.0717592	0.0749484
1418.39	0.0702602	0.0743061
1419.35	0.0687442	0.073704
1420.32	0.0674321	0.0731869
1421.28	0.0663625	0.0727596
1422.24	0.0654463	0.0724234
1423.21	0.0646002	0.0722022
1424.17	0.0638051	0.0721299
1425.14	0.0630919	0.0722262
1426.1	0.062497	0.072499
1427.07	0.0620332	0.0729761
1428.03	0.0616909	0.073728
1428.99	0.0614547	0.0748319
1429.96	0.0613121	0.0762837
1430.92	0.0612502	0.0779547
1431.89	0.0612563	0.0796824
1432.85	0.0613303	0.0814168
1433.82	0.0615005	0.0832805
1434.78	0.0618254	0.0854992
1435.74	0.0623584	0.0881967
1436.71	0.063074	0.0911338
1437.67	0.06385	0.0937729
1438.64	0.0645761	0.0957587
1439.6	0.0652393	0.0971412
1440.56	0.0658838	0.098142
1441.53	0.0665444	0.0989218
1442.49	0.0672176	0.0995263
1443.46	0.0678709	0.0999252
1444.42	0.0684721	0.10007
1445.39	0.0690158	0.0999269
1446.35	0.0695233	0.0994814
1447.31	0.0700091	0.0987205
1448.28	0.0704413	0.0976413
1449.24	0.0707455	0.0962793
1450.21	0.0708558	0.0947159
1451.17	0.0707579	0.0930456
1452.14	0.0704815	0.09133
1453.1	0.0700628	0.0895614
1454.06	0.0694979	0.0876199
1455.03	0.0686884	0.0852265
1455.99	0.0674227	0.0820509
1456.96	0.0656095	0.0783143
1457.92	0.0636595	0.0751476
1458.89	0.0620842	0.0732664
1459.85	0.0609226	0.0723067
1460.81	0.0599676	0.0717007
1461.78	0.0590336	0.071108
1462.74	0.0580012	0.0703638
1463.71	0.0568335	0.0694305
1464.67	0.0556191	0.0684207
1465.63	0.0545414	0.0675514
1466.6	0.0537221	0.0669619
1467.56	0.0531296	0.0666153
1468.53	0.0526503	0.0663869
1469.49	0.0521723	0.0661679
1470.46	0.0516091	0.0659067
1471.42	0.0509108	0.0656339
1472.38	0.0501102	0.0654833
1473.35	0.0493607	0.0656171
1474.31	0.0488266	0.0660509
1475.28	0.0485372	0.0666567
1476.24	0.0484273	0.0673346
1477.21	0.0484336	0.0680729
1478.17	0.0485184	0.0689066
1479.13	0.0486617	0.0698819
1480.1	0.0488596	0.0710417
1481.06	0.0491266	0.072414
1482.03	0.0494846	0.0739918
1482.99	0.0499379	0.0757223
1483.96	0.0504613	0.0775296
1484.92	0.0510196	0.0793728
1485.88	0.0516163	0.0813215
1486.85	0.0523519	0.0836256
1487.81	0.0534421	0.0866852
1488.78	0.0550726	0.0907157
1489.74	0.0571068	0.0952653
1490.7	0.0591313	0.0994975
1491.67	0.0608929	0.10304
1492.63	0.0624435	0.106099
1493.6	0.0639812	0.109077
1494.56	0.0657439	0.112367
1495.53	0.0679916	0.116306
1496.49	0.0709464	0.121092
1497.45	0.074584	0.126551
1498.42	0.0784858	0.132106
1499.38	0.0821286	0.137228
1500.35	0.0852678	0.141788
1501.31	0.0879299	0.145913
1502.28	0.0902541	0.149765
1503.24	0.0924613	0.1535
1504.2	0.0949849	0.157337
1505.17	0.098753	0.161656
1506.13	0.105225	0.166901
1507.1	0.11459	0.17277
1508.06	0.123662	0.17786
1509.03	0.13	0.181616
1509.99	0.134408	0.184669
1510.95	0.138186	0.187528
1511.92	0.141959	0.190291
1512.88	0.145889	0.192802
1513.85	0.14991	0.194773
1514.81	0.153812	0.195921
1515.78	0.1573	0.196148
1516.74	0.160106	0.195649
1517.7	0.162127	0.194754
1518.67	0.163465	0.193646
1519.63	0.164366	0.192265
1520.6	0.165114	0.190534
1521.56	0.165915	0.188648
1522.52	0.166811	0.186991
1523.49	0.167743	0.185716
1524.45	0.168664	0.184594
1525.42	0.169563	0.18329
1526.38	0.170422	0.18171
1527.35	0.17118	0.180064
1528.31	0.171775	0.178613
1529.27	0.172189	0.177379
1530.24	0.172467	0.176053
1531.2	0.172694	0.174118
1532.17	0.172939	0.171179
1533.13	0.173178	0.16746
1534.1	0.173276	0.163856
1535.06	0.173097	0.16117
1536.02	0.172598	0.159478
1536.99	0.17181	0.158269
1537.95	0.170778	0.156748
1538.92	0.169545	0.153915
1539.88	0.168181	0.148935
1540.85	0.166795	0.142632
1541.81	0.165405	0.137562
1542.77	0.163911	0.134605
1543.74	0.162253	0.132739
1544.7	0.160442	0.131125
1545.67	0.158512	0.129499
1546.63	0.156493	0.127838
1547.59	0.154398	0.126125
1548.56	0.152216	0.124294
1549.52	0.149904	0.122263
1550.49	0.147417	0.120022
1551.45	0.144762	0.117685
1552.42	0.142047	0.115457
1553.38	0.139449	0.113516
1554.34	0.137101	0.111906
1555.31	0.134963	0.110486
1556.27	0.13262	0.108856
1557.24	0.129068	0.106283
1558.2	0.123342	0.102279
1559.17	0.116743	0.0980484
1560.13	0.111745	0.0952415
1561.09	0.108494	0.0936756
1562.06	0.105965	0.0925014
1563.02	0.103494	0.0912292
1563.99	0.100865	0.0897036
1564.95	0.098102	0.0879348
1565.92	0.0952862	0.0859797
1566.88	0.0924232	0.0838589
1567.84	0.0894069	0.0815465
1568.81	0.086182	0.079083
1569.77	0.0829663	0.0766941
1570.74	0.0801454	0.0746688
1571.7	0.0779174	0.0731138
1572.66	0.0761606	0.0719039
1573.63	0.0745405	0.0707841
1574.59	0.072657	0.0694865
1575.56	0.0702805	0.0679009
1576.52	0.0676729	0.066269
1577.49	0.0654483	0.0650206
1578.45	0.0638902	0.0642946
1579.41	0.0627924	0.063901
1580.38	0.0618487	0.0636247
1581.34	0.0608958	0.0633807
1582.31	0.0599305	0.0632043
1583.27	0.0590398	0.0631869
1584.24	0.0583054	0.0634003
1585.2	0.0577415	0.0638609
1586.16	0.0573117	0.0645541
1587.13	0.0569882	0.0654776
1588.09	0.0567809	0.0666464
1589.06	0.056718	0.0680642
1590.02	0.0568127	0.0697073
1590.99	0.0570566	0.0715484
1591.95	0.0574387	0.0735931
1592.91	0.0579555	0.0758823
1593.88	0.0585973	0.0784489
1594.84	0.0593289	0.0812715
1595.81	0.0600997	0.0842812
1596.77	0.0608806	0.0874257
1597.73	0.0616899	0.0907314
1598.7	0.0625827	0.0943114
1599.66	0.0636223	0.0983261
1600.63	0.0648621	0.102924
1601.59	0.0663438	0.108182
1602.56	0.0680976	0.11406
1603.52	0.0701349	0.120404
1604.48	0.0724505	0.127023
1605.45	0.075063	0.133795
1606.41	0.0780747	0.140737
1607.38	0.0816807	0.147952
1608.34	0.0860419	0.155474
1609.31	0.0910614	0.163094
1610.27	0.0963164	0.170393
1611.23	0.101317	0.177011
1612.2	0.105871	0.182857
1613.16	0.110275	0.188101
1614.13	0.115344	0.193029
1615.09	0.122167	0.197839
1616.06	0.131185	0.202392
1617.02	0.141099	0.206196
1617.98	0.149756	0.208888
1618.95	0.156327	0.210505
1619.91	0.161539	0.211165
1620.88	0.166554	0.210762
1621.84	0.172161	0.209026
1622.8	0.178359	0.205851
1623.77	0.184306	0.201637
1624.73	0.189002	0.197105
1625.7	0.192173	0.192688
1626.66	0.194295	0.188303
1627.63	0.195953	0.183756
1628.59	0.19739	0.17918
1629.55	0.198534	0.175022
1630.52	0.199277	0.171647
1631.48	0.19967	0.169036
1632.45	0.199959	0.166757
1633.41	0.200549	0.164045
1634.38	0.201956	0.160018
1635.34	0.204458	0.154463
1636.3	0.207492	0.148752
1637.27	0.210031	0.144614
1638.23	0.211729	0.142193
1639.2	0.212864	0.140665
1640.16	0.21373	0.139411
1641.13	0.214461	0.138223
1642.09	0.215112	0.13709
1643.05	0.215744	0.135973
1644.02	0.216465	0.134657
1644.98	0.217379	0.132755
1645.95	0.218417	0.130066
1646.91	0.219221	0.127147
1647.88	0.21945	0.124984
1648.84	0.21912	0.123916
1649.8	0.218413	0.123528
1650.77	0.217382	0.123119
1651.73	0.215821	0.121809
1652.7	0.213309	0.118838
1653.66	0.20981	0.114876
1654.62	0.206077	0.111834
1655.59	0.20261	0.11021
1656.55	0.199308	0.109294
1657.52	0.195959	0.108492
1658.48	0.192402	0.107513
1659.45	0.188449	0.106183
1660.41	0.183863	0.104365
1661.37	0.178529	0.102033
1662.34	0.172778	0.0994451
1663.3	0.167341	0.0970613
1664.27	0.162754	0.0951813
1665.23	0.158982	0.0937564
1666.2	0.155573	0.0925078
1667.16	0.15192	0.0910795
1668.12	0.147505	0.0891718
1669.09	0.142293	0.0867629
1670.05	0.13698	0.0842611
1671.02	0.132414	0.0821757
1671.98	0.128743	0.0806068
1672.95	0.125471	0.079258
1673.91	0.122039	0.0777784
1674.87	0.118221	0.0760126
1675.84	0.114232	0.0740849
1676.8	0.110502	0.0722739
1677.77	0.107301	0.0707649
1678.73	0.104597	0.0695453
1679.69	0.102184	0.0684767
1680.66	0.0997872	0.0673686
1681.62	0.0970563	0.065988
1682.59	0.0936302	0.0641129
1683.55	0.0895415	0.0618047
1684.52	0.0855787	0.0596256
1685.48	0.0824836	0.0580877
1686.44	0.0801442	0.0571414
1687.41	0.0780748	0.0564978
1688.37	0.0759645	0.0559633
1689.34	0.0737668	0.055477
1690.3	0.0715929	0.0550509
1691.27	0.0695612	0.0547138
1692.23	0.0676881	0.0544831
1693.19	0.0658692	0.0543659
1694.16	0.0639487	0.0543772
1695.12	0.0618323	0.0545394
1696.09	0.059571	0.0548163
1697.05	0.0573056	0.0549719
1698.02	0.0550602	0.0545085
1698.98	0.0526609	0.0529523
1699.94	0.0499952	0.0503229
1700.91	0.0472199	0.0471289
1701.87	0.0445657	0.043855
1702.84	0.0420731	0.0406258
1703.8	0.0395859	0.0372961
1704.76	0.036932	0.0337337
1705.73	0.0341285	0.030065
1706.69	0.0314367	0.0266913
1707.66	0.0291679	0.0240029
1708.62	0.0274302	0.0220799
1709.59	0.0261005	0.0207055
1710.55	0.0249822	0.0195924
1711.51	0.0239442	0.0185525
1712.48	0.022953	0.0175313
1713.44	0.0220275	0.0165553
1714.41	0.0211616	0.0156552
1715.37	0.0202764	0.0148191
1716.34	0.0192858	0.0140268
1717.3	0.0182736	0.0133388
1718.26	0.0174629	0.0128526
1719.23	0.0169349	0.012558
1720.19	0.016587	0.0123542
1721.16	0.016286	0.012148
1722.12	0.0159503	0.0118964
1723.09	0.0155576	0.0116035
1724.05	0.0151246	0.0113002
1725.01	0.0146804	0.0110155
1725.98	0.0142446	0.0107558
1726.94	0.0138239	0.0105084
1727.91	0.0134232	0.0102599
1728.87	0.0130513	0.0100076
1729.83	0.0127121	0.00975335
1730.8	0.0123918	0.00949057
1731.76	0.0120577	0.00920238
1732.73	0.011689	0.0088877
1733.69	0.0113247	0.00859429
1734.66	0.0110423	0.00838704
1735.62	0.010869	0.00827307
1736.58	0.0107659	0.00820433
1737.55	0.0106826	0.00813033
1738.51	0.0105896	0.00802507
1739.48	0.0104822	0.00789032
1740.44	0.0103711	0.00774992
1741.41	0.0102676	0.00763329
1742.37	0.0101704	0.00755401
1743.33	0.010067	0.00750264
1744.3	0.00994555	0.00745828
1745.26	0.00980139	0.00740155
1746.23	0.00963764	0.0073196
1747.19	0.00946437	0.00720816
1748.16	0.00930101	0.00707751
1749.12	0.00917563	0.00695705
1750.08	0.00910906	0.00688083
1751.05	0.00909454	0.00685742
1752.01	0.00910219	0.00686376
1752.98	0.00910162	0.00686907
1753.94	0.00907433	0.00685429
1754.9	0.00901385	0.00681541
1755.87	0.00892358	0.00675929
1756.83	0.00881471	0.00669741
1757.8	0.00870163	0.00663895
1758.76	0.00859571	0.00658722
1759.73	0.00850208	0.00654243
1760.69	0.0084218	0.00650711
1761.65	0.00835539	0.00648653
1762.62	0.00830311	0.00648172
1763.58	0.00826209	0.00648295
1764.55	0.00822515	0.00647221
1765.51	0.00818292	0.00643176
1766.48	0.00812732	0.00635111
1767.44	0.00805483	0.00623034
1768.4	0.00796936	0.00608099
1769.37	0.00788423	0.00592537
1770.33	0.00782083	0.00579424
1771.3	0.00779881	0.00572014
1772.26	0.00781806	0.00572152
1773.23	0.0078516	0.00578706
1774.19	0.00786586	0.00588306
1775.15	0.00784361	0.00597715
1776.12	0.00778573	0.00605006
1777.08	0.00770318	0.00609291
1778.05	0.00761196	0.00610292
1779.01	0.00752977	0.00608291
1779.97	0.0074699	0.00604179
1780.94	0.00743432	0.00599223
1781.9	0.00741392	0.00594539
1782.87	0.00739755	0.00590813
1783.83	0.00738021	0.0058843
1784.8	0.00736236	0.00587612
1785.76	0.00734305	0.00588238
1786.72	0.0073153	0.00589574
1787.69	0.00726832	0.00590263
1788.65	0.00719388	0.00588568
1789.62	0.0070932	0.00582805
1790.58	0.00698282	0.00572273
1791.55	0.00689309	0.00558793
1792.51	0.00684845	0.00546993
1793.47	0.00684287	0.00540994
1794.44	0.00684807	0.00540864
1795.4	0.00684304	0.00543538
1796.37	0.00682552	0.00545612
1797.33	0.00680521	0.00544738
1798.3	0.00679366	0.00540035
1799.26	0.0067954	0.00532405
1800.22	0.00680249	0.0052439
