# Supplementary material for: The influence of thermal treatments on the secondary structure of silk fibroin scaffolds and their interaction with fibroblasts
Source: PeerJ journal article supplement (doi:10.7717/peerj-matsci.8), 2020-09-01
Supplement: revised_Table_2_raw_date.xlsx [file revised_Table_2_raw_date.xlsx]

## Sheet: Sheet1
n=6
Mimicking surface		b-sheet	Random Coil	a-helix	Turn
DH	1-1-	34.2481	25.4665	17.8924	22.393	100		Mimicking surface	Contents (%)
	1-2-	32.7414	25.8602	18.9789	22.4195	100			b-sheet	random coil	a-helix	turn
	1-3-	32.0356	27.5862	18.7987	21.5795	100		DH	29.6045	26.3407	19.3893	24.6655
	2-1-	27.3412	25.7266	20.3445	26.5877	100		AC	51.2596	17.0404	16.2653	15.4347
	2-2-	25.8861	26.638	20.0859	27.3899	100
	2-3-	25.3747	26.7666	20.2355	27.6231	100
AVERAGE		29.6045	26.3407	19.3893	24.6655	100
AC	1-1-	53.8553	15.4211	15.777	14.9466	100
	1-2-	53.1067	16.4127	15.1231	15.3576	100
	1-3-	50.0569	17.4061	17.2924	15.2446	100
	2-1-	51.6564	17.1779	16.6871	14.4785	100
	2-2-	48.2143	18.192	17.4107	16.183	100
	2-3-	46.9852	18.9989	17.4061	16.6098	100
	3-1-	51.9298	17.5439	15.3216	15.2047	100
	3-2-	53.3735	16.0241	15.5422	15.0602	100
	3-3-	52.1583	16.1871	15.8273	15.8273	100
AVERAGE		51.2596	17.0404	16.2653	15.4347
