# Supplementary figures and images for: The influence of thermal treatments on the secondary structure of silk fibroin scaffolds and their interaction with fibroblasts
Source: PeerJ journal article supplement (doi:10.7717/peerj-matsci.8), 2020-09-01

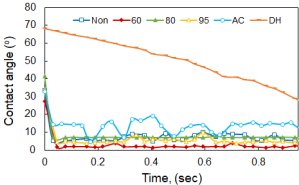

Supplement: Figure_for_the_review_#2.pdf [file Figure_for_the_review_%232.pdf]

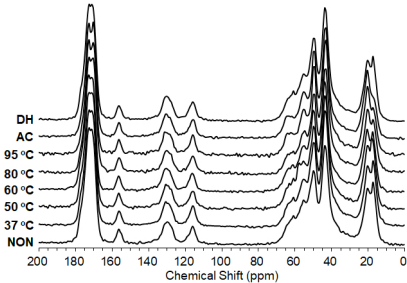

Supplement: Figure_for_the_review_#3(a).pdf [file Figure_for_the_review_%233%28a%29.pdf]

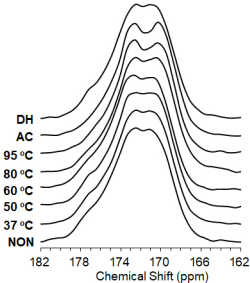

Supplement: Figure_for_the_review_#3(b).pdf [file Figure_for_the_review_%233%28b%29.pdf]

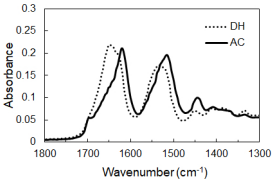

Supplement: Figure_for_the_review_#4.pdf [file Figure_for_the_review_%234.pdf]

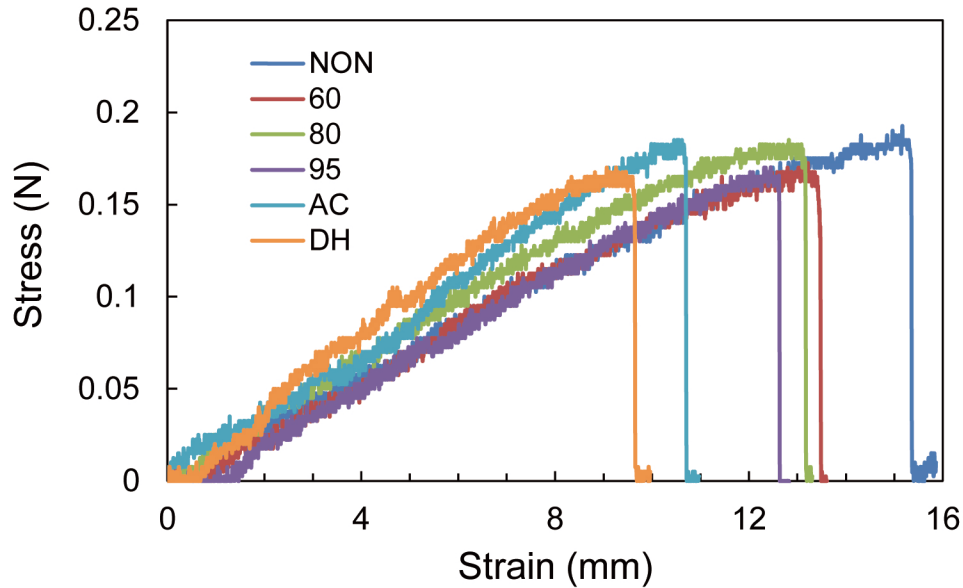

Supplement: revised_Figure_for_the_review_#1.pdf [file revised_Figure_for_the_review_%231.pdf]
